# Supplementary material for: Exchange, promiscuity, and orthogonality in de novo designed coiled-coil peptide assemblies
Source: Royal Society of Chemistry journal article supplement (doi:10.1039/d4sc06329e), 2024-12-09
Supplement: d4sc06329e1.pdf [file d4sc06329e1.pdf]

**Supporting Information for: Exchange, promiscuity, and orthogonality in *de novo* designed coiled-coil peptide assemblies**

Kathleen W. Kurgan,<sup>1,†</sup> Freddie J. O. Martin,<sup>1,†</sup> William M. Dawson,<sup>1</sup> Tom Brunnock,<sup>1</sup> Andrew J. Orr-Ewing,<sup>1</sup> and Derek N. Woolfson<sup>1,2,3,4\*</sup>

<sup>1</sup>School of Chemistry, University of Bristol, Cantock's Close, Bristol BS8 1TS, UK

<sup>2</sup>School of Biochemistry, University of Bristol, Medical Sciences Building, University Walk, Bristol BS8 1TD, UK

<sup>3</sup>Bristol BioDesign Institute, School of Chemistry, University of Bristol, Cantock's Close, Bristol BS8 1TS, UK

<sup>4</sup>Max Planck-Bristol Centre for Minimal Biology, University of Bristol, Cantock's Close, Bristol BS8 1TS, UK

<sup>†</sup>Contributed equally to this work.

\*To whom correspondence should be addressed: [D.N.Woolfson@bristol.ac.uk](mailto:D.N.Woolfson@bristol.ac.uk)

|                                                          |                |
|----------------------------------------------------------|----------------|
| <b>Methods</b> .....                                     | <b>S2-S6</b>   |
| <b>General</b> .....                                     | <b>S2</b>      |
| <b>Peptide Synthesis and Purification</b> .....          | <b>S2-S3</b>   |
| <b>Biophysical Characterization</b> .....                | <b>S3-S4</b>   |
| <b>Fluorescence Measurements</b> .....                   | <b>S4-S6</b>   |
| <b>X-Ray Structure Determination</b> .....               | <b>S6</b>      |
| <b>CC-Di Kinetics Data</b> .....                         | <b>S7-S22</b>  |
| <b>CC Basis Set Data</b> .....                           | <b>S23-S35</b> |
| <b>Sequences</b> .....                                   | <b>S23</b>     |
| <b>MALDI and AHPLC</b> .....                             | <b>S23-S27</b> |
| <b>CD Characterization</b> .....                         | <b>S27-S29</b> |
| <b>Fluorescence Measurements</b> .....                   | <b>S30-S35</b> |
| <b>CC-Tri and CCTet* Fluorescence Measurements</b> ..... | <b>S36</b>     |
| <b>Orthogonal CC Set Data</b> .....                      | <b>S36-S49</b> |
| <b>Sequences</b> .....                                   | <b>S36</b>     |
| <b>MALDI and AHPLC</b> .....                             | <b>S36-S38</b> |
| <b>CD Characterization</b> .....                         | <b>S38-S39</b> |
| <b>X-Ray Structures</b> .....                            | <b>S40-S41</b> |
| <b>Analytical Ultracentrifugation Data</b> .....         | <b>S42</b>     |
| <b>Fluorescence Measurements</b> .....                   | <b>S43-S49</b> |
| <b>References</b> .....                                  | <b>S50-S51</b> |

## Methods

### General

All solvents, chemicals, and reagents were purchased from commercial sources and used without further purification. Fluorenylmethoxycarbonyl(Fmoc)- $\alpha$ -L-amino acids, Rink amide MBHA resin for solid-phase peptide synthesis (SPPS) and N,N-dimethylformamide (DMF) were purchased from Sigma-Aldrich and Cambridge Reagents. Coupling reagents Oxyma Pure and diisopropylcarbodiimide (DIC) were purchased from Fluorochem. Morpholine, and trifluoroacetic acid (TFA) were purchased from Sigma-Aldrich; pyridine was from Thermo Fisher; triisopropylsilane (TIPS) was from Acros Organics. All other chemicals were reagent grade and purchased from Sigma-Aldrich. Peptide biophysical characterization data were recorded in phosphate buffered saline (PBS; 8.2 mM sodium phosphate dibasic, 1.8 mM potassium phosphate monobasic, 137 mM NaCl, 2.4 mM KCl), pH 7.4. Peptide characterisation data for CC-Di, CC-Tri, CC-Tet, CC-Tet\*, CC-Pent2, CC-Hex2, and CC-Hept have been published previously.<sup>1-3</sup>

### Peptide Synthesis

Peptides were prepared by standard Fmoc microwave-assisted solid-phase peptide synthesis using a Liberty Blue™ automatic synthesizer (CEM) with inline UV monitoring. Pre-swelled Rink amide MBHA resin (100  $\mu$ mol) was added to the sample loader. Fmoc-protected amino acids were coupled to the resin via addition of 2.5 mL of 0.2 M Fmoc-amino acid (5 equiv.) in DMF, 1.0 mL of 1 M *N,N*-diisopropylcarbodiimide in DMF (10 equiv.) and 1.0 mL of 0.5 M ethyl cyano(hydroxyamino)acetate (5 equiv.) in DMF, as recommended by CEM, to the reaction vessel. Deprotection of the Fmoc group was performed by addition of 20% (v/v) morpholine in DMF into the reaction vessel and heating the reaction vessel to 90 °C for 1 min (125 W 30 s, 32 W 60 s).

Following the deprotection of the N-terminal Gly residue, the resin was transferred to a fritted syringe. Unlabelled peptides were acetyl capped by addition of 0.5 mL acetic anhydride and 0.25 mL of pyridine in excess DMF. The resulting mixture was rocked at RT for 20 min. Carboxy-fluorescein (5 equiv.) was coupled onto the N-terminus to generate labelled peptides using the coupling conditions described above and rocked at RT for 2 hrs. Acetyl and FAM-capped peptides were washed 4X with DMF and 4X with DCM prior to cleavage. Peptides were then cleaved from the resin by addition of 8 mL of a cleavage cocktail consisting of 2.5 % H<sub>2</sub>O, 2.5% triisopropylsilane and 95% trifluoroacetic acid (TFA). The solution was rocked for 2 hours and subsequently filtered through the fritted syringe. The resin was washed two more times with TFA, and the filtered TFA solutions were combined. The TFA in the combined solution was evaporated under a stream of nitrogen. To the resulting brown oil was added chilled diethyl ether, which caused precipitation. Crude peptide was isolated using centrifugation, re-dissolved in 1:1 MeCN:H<sub>2</sub>O and lyophilized to yield a white powder.

## Peptide Purification

Crude products of peptide syntheses were purified via RP-HPLC using a Jasco system consisting of a UV-4075 UV/Vis detector, PU-4180 HPLC Pump, LC-Net II/ADC computer-instrument interface, and co-2060 Plus HPLC column thermostat. The purification was conducted with Luna® C18 (Phenomenex) column (150 mm x 10 mm, 5  $\mu$ m particle size, 100 Å pore size) using a gradient elution of 20-80%, 30-90%, or 40-100% B solvent over 30 minutes. Solvent A is 0.1% TFA in MilliQ H<sub>2</sub>O, and solvent B is 0.1% TFA in HPLC-grade acetonitrile. When required, the column was heated to 50 °C to assist peptide elution. Chromatograms were monitored at 220 and 280 nm wavelengths. The presence of the desired peptide was established via matrix-assisted laser desorption ionization-time of flight (MALDI-TOF) mass spectroscopy attained via use of a Bruker ULTRAFLEX™ instrument in positive-ion reflector mode. Peptides were spotted on a ground steel target plate using  $\alpha$ -cyano-4-hydroxycinnamic acid dissolved in 1:1 MeCN/H<sub>2</sub>O as the matrix. Expected monoisotopic masses of the singly protonated species of each peptide are listed in Tables S2 and S5. Purity was quantified utilizing a Jasco 2000 HPLC and a Phenomenex Kinetex C18 (100 x 4.6 mm, 5  $\mu$ m particle size, 100 Å pore size) column. Chromatograms were monitored at 220 and 280 nm wavelengths. The linear gradient was 20 – 100% MeCN in water (each containing 0.1% TFA) over 25 min at a flow rate of 1 mL/min.

## Determining Concentration of FAM-labelled Peptides

The concentration of purified lyophilized peptide dissolved in MilliQ water was determined by measuring the absorbance of the sample at 280 nm using a ThermoScientific 2000 UV-Vis spectrometer. For all non-labelled peptides, the  $\epsilon_{280\text{nm}} = 5500 \text{ cm}^{-1}\text{M}^{-1}$  as each contains a single tryptophan. The protocol for determining the concentration of the FAM-labelled peptides follows the one described in “Exploring the Dynamic and Conformational Landscape of  $\alpha$ -Helical Peptide Assemblies.”<sup>4</sup> Peptide samples were diluted in 25 mM Tris pH 8, 1% SDS buffer and their absorbance measured at 495 nm. The extension coefficient used for FAM-labelled peptides in 25 mM Tris pH 8, 100 mM NaCl, 1% SDS buffer was previously measured as  $\epsilon_{495\text{nm}} = 89000 \text{ cm}^{-1}\text{M}^{-1}$ .

## Circular Dichroism

Circular dichroism (CD) data were collected on a JASCO J-810 spectropolarimeter fitted with a Peltier temperature controller. Peptide samples were made up as 50 or 25  $\mu$ M peptide solutions in phosphate buffered saline (PBS; 8.2 mM sodium phosphate dibasic, 1.8 mM potassium phosphate monobasic, 137 mM NaCl, 2.4 mM KCl), pH 7.4. Data were collected in a 1 mm quartz cuvette between 190 and 600 nm with the instrument set as follows: band width 1 nm, data pitch 1 nm, scanning speed 100 nm/min, 1 s response time at 5 °C. Each CD spectrum was obtained by averaging 8 scans and subtracting the background signal

of buffer and cuvette. For thermal response experiments, the CD signal at 222 nm wavelength was monitored over the temperature range 5 – 95 °C at a ramp rate of 60 °C per hour, with the same settings and peptide concentrations given above. The spectra were converted from ellipticities (mdeg) to mean residue ellipticities (MRE, (deg×cm<sup>2</sup>×dmol<sup>-1</sup>×res<sup>-1</sup>)) by normalising for the concentration of peptide bonds and the cell path length using equation 1:

$$MRE = \frac{\theta \times 10^6}{c \times l \times n}$$

**Equation 1:** where the variable  $\theta$  is the measured difference in absorbed circularly polarized light in millidegrees,  $c$  is the  $\mu$ M concentration of the compound,  $l$  is the path length of the cuvette in mm, and  $n$  is the number of amide bonds in the polypeptide.

### Analytical Ultracentrifugation

Analytical ultracentrifugation (AUC) was performed on a Beckman Optima X-LA or X-LI analytical ultracentrifuge with an An-50-Ti or An-60-Ti rotor (Beckman-Coulter). Buffer densities, viscosities and peptide and protein partial specific volumes ( $\bar{v}$ ) were calculated using SEDNTERP (<http://rasmb.org/sednterp/>). For sedimentation velocity (SV) experiments, peptide samples were prepared in PBS at 75  $\mu$ M peptide concentration and placed in a sedimentation velocity cell with 2-channel centrepiece and quartz windows. The samples were centrifuged at 50 krpm at 20 °C, with absorbance scans taken over a radial range of 5.8 – 7.3 cm at 5 min intervals to a total of 120 scans. Data from a single run were fitted to a continuous  $c(s)$  distribution model using SEDFIT<sup>5</sup> at a 95% confidence level. Residuals for sedimentation velocity experiments are shown as a bitmap in which the grayscale shade indicates the difference between the fit and raw data (residuals < -0.05 black, > 0.05 white). Good fits are uniformly grey without major dark or light streaks. Sedimentation equilibrium (SE) experiments were performed at 50  $\mu$ M peptide concentration in 110  $\mu$ L at 20 °C. The experiment was run in triplicate in a six-channel centrepiece. The samples were centrifuged at speeds in the range of 20 – 45 krpm and scans at each recorded speed were duplicated after equilibration for 8 hours. Data were fitted using SEDPHAT<sup>6</sup> to a single species model. Monte Carlo analysis was performed to give 95% confidence limits.

### Fluorescence Measurements – CC-Di Kinetics

Kinetic traces of CC-Di exchange were measured using a Jasco FP-6500 spectrofluorometer with a Julabo F12 temperature controller set at the desired temperature. Fluorescence was measured at an excitation wavelength of 495 nm ( $\pm$  2 nm) and an emission wavelength of 550 nm ( $\pm$  2 nm). Time-course measurements were carried out for up to 10,000 seconds or until an end to the rise in fluorescence had been reached where possible. Stocks of labelled and unlabelled peptides were maintained at the experiment temperature in a Grant-bio thermo-shaker. 100  $\mu$ L of the stock of labelled peptide was added to a quartz cuvette and allowed to equilibrate; at this point, the fluorescence measurement was started. Once the

fluorescence of the labelled stock had equilibrated, an equal volume of the unlabelled peptide stock was added to the solution and mixed thoroughly in the cuvette; after this, the lid was closed, and the fluorescence time course measurement resumed. The curves were fit to either a single exponent (equation 1).

$$f(t)=A(1-\exp(k_{obs}\cdot t))$$

**Equation 1:** where  $t$  is time,  $A$  is the pre-exponential factor and  $k_{obs}$  is the observed rate.

Our preferred method to interpret the data used single-exponential fitting. We recognise that this is a choice of kinetic model that may not account for the full complexity of the exchange pathways. And, we propose a mechanism for exchange that is consistent with this model. To test the validity of our single-exponential fits, we plotted the residual errors of the fitted data. These do reveal some small deviations from the fitted functions (see examples below for some of the most significant deviations). However, because the deviations of the residuals from the mean are small overall, the amplitude of an additional exponential term in bi-exponential fits would only be a few percent of the main exponential decay term; including an extra fit function would not change the extracted kinetics much. Therefore, we chose to use the minimum number of exponential fit functions that give a good account of the experimental data.

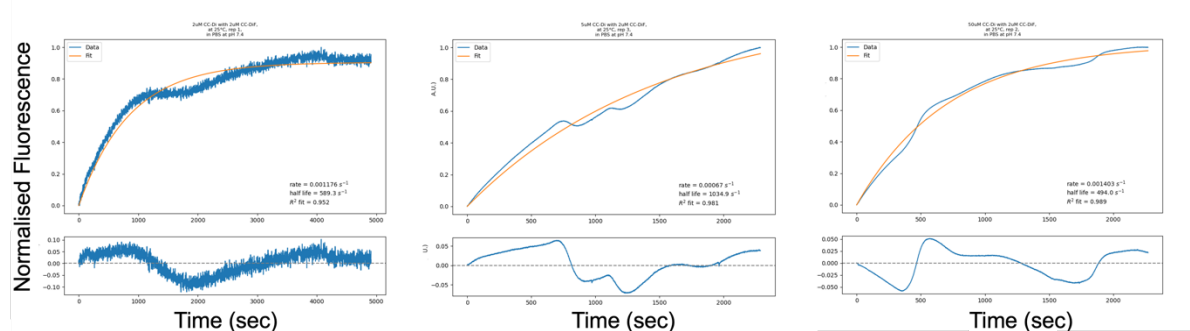

Activation energy of CC-Di was calculated using Equation 2.

$$k=A\cdot\exp(-E_A/RT)$$

**Equation 2:** The Arrhenius equation, where  $k$  is the rate constant,  $A$  is the pre-exponential factor,  $E_A(\text{J mol}^{-1})$  is the activation energy,  $R$  is the molar gas constant ( $\text{J mol}^{-1}\text{K}^{-1}$ ), and  $T$  is the temperature (K).

All measurements were replicated 3 times.

Data were processed and fit to equation 2 using the code in a Jupyter notebook. This code is available on the Woolfson lab github ([http://github.com/woolfson-group/CC\\_exchange](http://github.com/woolfson-group/CC_exchange))

### Fluorescence Measurements – Screen of Hendecad-Incorporated Peptides

Samples of 1:10 FAM-labelled peptide assembly:unlabelled peptide assembly were prepared in PBS buffer. The mixtures were kept in the dark and incubated at 25 °C. At 1hr, 24hr, and post-annealing time points, 200  $\mu\text{L}$  of sample was transferred to 1 cm quartz

cuvettes and fluorescence measurements were conducted using a Jasco FP-6500 spectrofluorometer with a Julabo F12 temperature controller set to 25 °C. Samples were excited at 495 nm (bandwidth = 1 nm) and emission was measured from 510-700 nm (bandwidth = 3 nm) with a data pitch of 1 nm. Response time was set to 1 sec, PMT Voltage was set to 500 V, and scanning speed was set to 200 nm/min. Three 510-700 nm scans were acquired for each sample and averaged. Each measurement was performed three times.

### Fluorescence Measurements – Plate Reader

Samples of 1:10 FAM-labelled peptide assembly:unlabelled peptide assembly were prepared in PBS buffer. The mixtures were kept in the dark and incubated at 25 °C. At 1hr, 24hr, and post-annealing time points, 100 µL of sample was transferred to black 96-well plates suitable for fluorescence measurements. Fluorescence was measured using a BMG Labtech (Aylesbury, UK) Clariostar plate reader set to 25 °C. Samples were excited at 483 (+/- 14 nm) and emission measured at 530 (+/- 30 nm) with dichroic filter 502.5. For all measurements the gain was set to 500 and the focal height to 5.7 mm. All experiments were performed 3 times.

All data were normalised to the values corresponding to the FAM-labelled peptide where the annealed FAM-labelled peptide in buffer is set to zero and the annealed homotypic exchange of the FAM-labelled peptide set to one. For example, all data acquired of samples prepared with FAM-CC-Di and unlabelled peptide were normalised against the averaged fluorescence values of annealed FAM-CC-Di in buffer, set to zero, and the averaged fluorescence values of annealed FAM-CC-Di+CC-Di, set to one.

### Peptide Crystallization

Diffraction-quality peptide crystals were grown using a sitting- drop vapor-diffusion method. Commercially available sparse matrix screens were used (Morpheus®, JCSG-plus™, Structure Screen 1 and 2, Pact Premier™, ProPlex™; Molecular Dimensions), and the drops were dispensed using a robot (Oryx8; Douglas Instruments). For each well of an MRC 2 drop plate, 0.3 µL of peptide (8 mg/mL) and 0.3 µL of reservoir solution in parallel with 0.4 µL of the peptide and 0.2 µL of reservoir solution were mixed and the plate was incubated at 20 °C. Crystals of CC-Hex2-hen2, Ala at *h*, grown in 0.3 M magnesium formate dihydrate and 0.1 M BIS\_TRIS pH 5.5, CC-Hept-hen2, Ala at *h*, grown in 1 M sodium citrate, pH 5.5 and 20 % w/v PEG 3000, and CC-Hept-IV-hen2 grown in 1.5 M ammonium sulphate and 0.1 M sodium acetate, pH 5.0 were looped and soaked in a reservoir containing 25% (v/v) glycerol as a cryoprotectant.

### X-Ray Data Collection and Structure determination.

Diffraction data for the crystals were obtained at the Diamond Light Source (Didcot, UK) on beamlines I04 and I24. Data were processed using the automated pipelines: Xia2 pipelines<sup>7</sup>, which ports data through DIALS<sup>8</sup> or MOSFLM<sup>9</sup> to POINTLESS and AIMLESS<sup>10</sup> as implemented in the CCP4 suite<sup>11</sup>, or XDS to XSCALE<sup>12</sup>; or the AUTOPROC pipelines, which

use the same integrating and data reduction software in addition to STARANISO.<sup>13</sup> The data acquired for the CC-Hex2-hen2, Ala at **h**, were phased using either *ab initio* phasing using ARCIMBOLDO\_LITE<sup>14,15</sup> to generate a model for molecular replacement using PHASER.<sup>16</sup> A phenylalanine version of the AlphaFold2<sup>17</sup> model of CC-Hept-IV-hen2 was used as the search model to phase the CC-Hept-IV-hen2 data using molecular replacement using PHASER.<sup>16</sup> Initial models were built from the initial solution using BUCCANEER.<sup>18</sup> Final structures were obtained after iterative rounds of model building with COOT<sup>19</sup> and refinement with REFMAC5.<sup>20</sup>

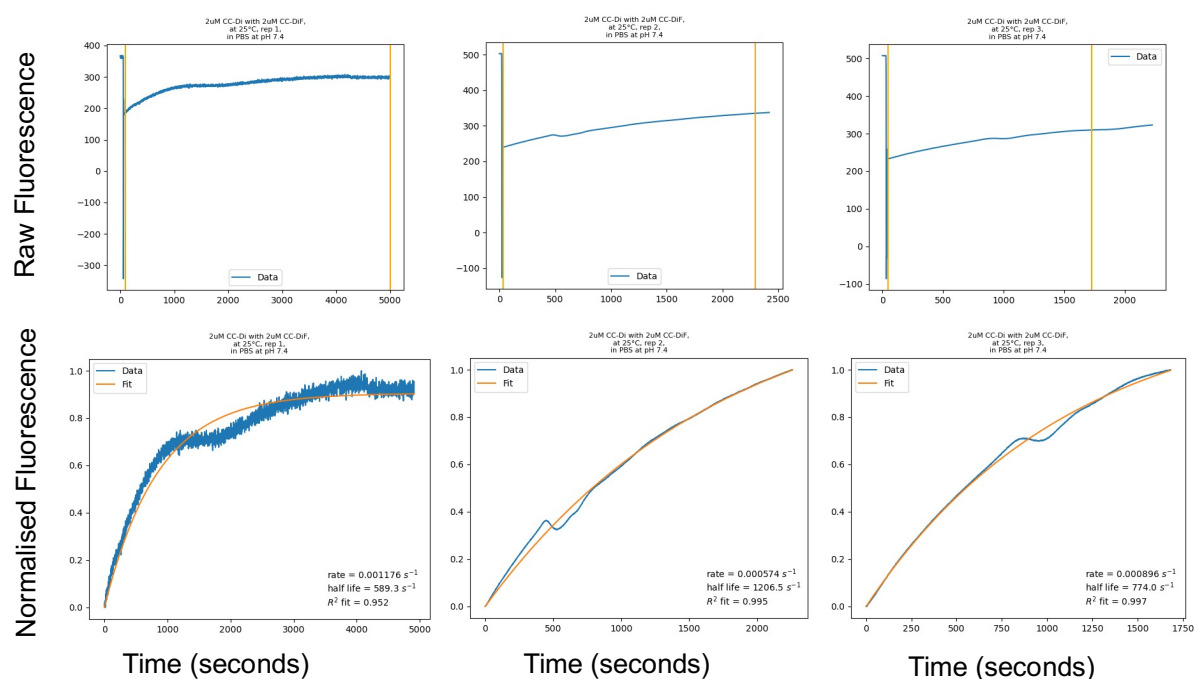

**Figure S1. Time course data and fits for the exchange of CC-Di (2  $\mu\text{M}$ ) and labelled CC-Di (2  $\mu\text{M}$ ), replicates 1-3.** (Top) Raw fluorescence (A.U.) time course data for the exchange with orange lines showing where the raw time course was trimmed for the fit to the single exponent. (Bottom) Normalised fluorescence data (A.U.) (blue) and single-exponential fits (orange).

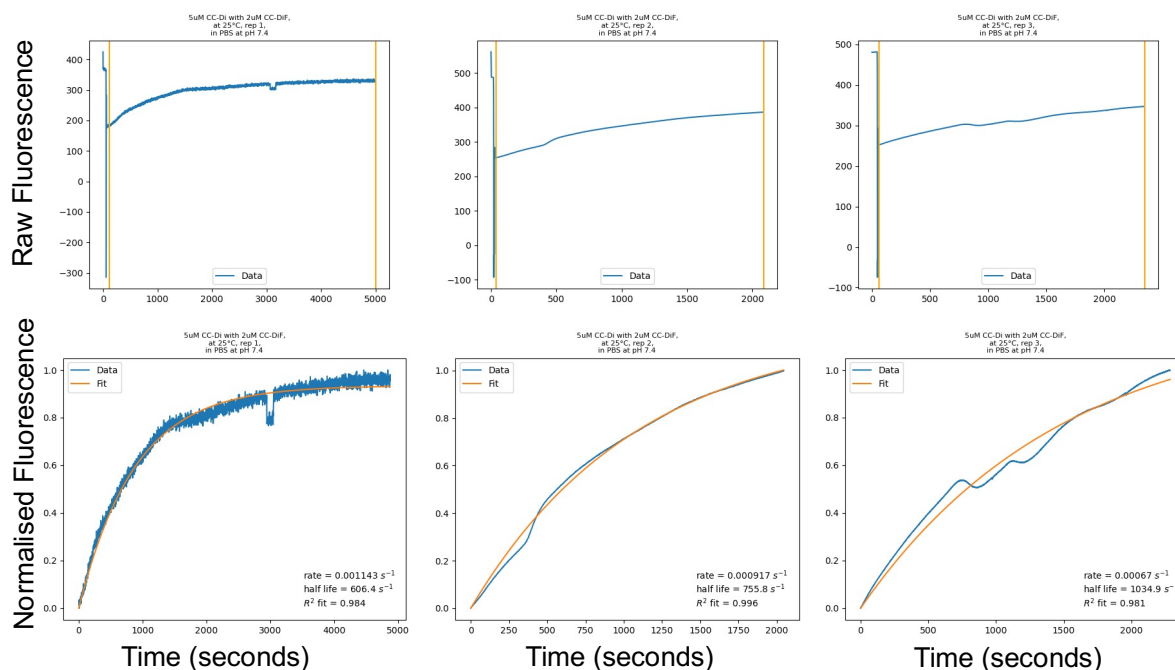

**Figure S2. Time course data and fits for the exchange of CC-Di (5  $\mu\text{M}$ ) and labelled CC-Di (2  $\mu\text{M}$ ), replicates 1-3.** (Top) Raw fluorescence (A.U.) time course data for the exchange with orange lines showing where the raw time course was trimmed for the fit to the single exponent. (Bottom) Normalised fluorescence data (A.U.) (blue) and single-exponential fits (orange).

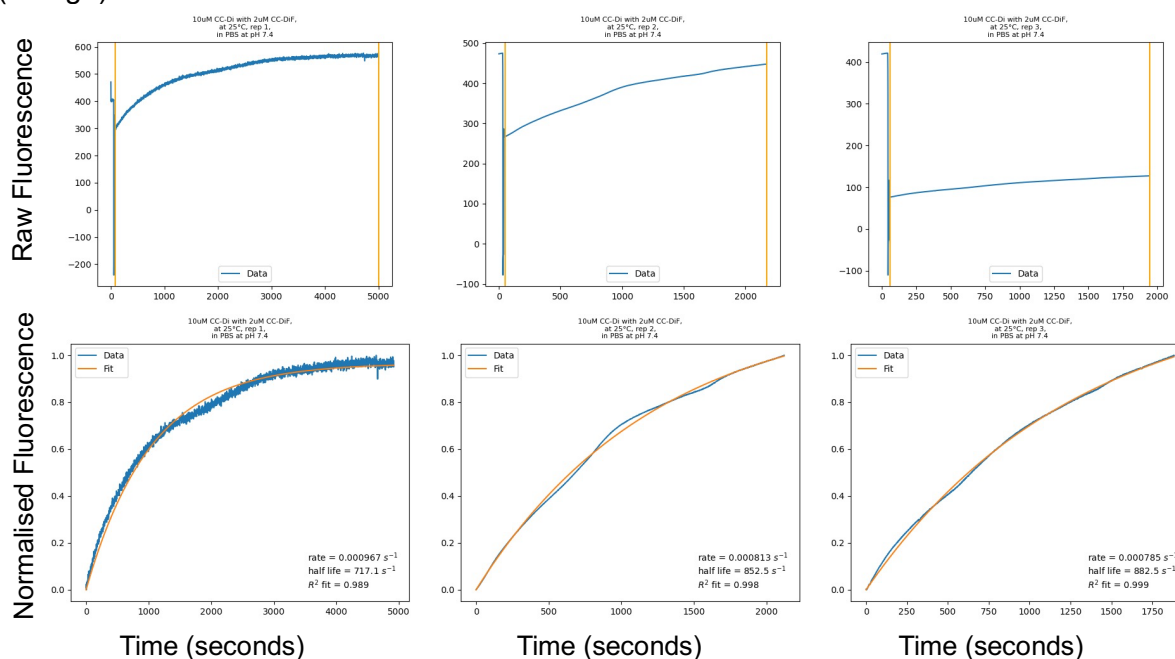

**Figure S3. Time course data and fits for the exchange of CC-Di (10  $\mu\text{M}$ ) and labelled CC-Di (2  $\mu\text{M}$ ), replicates 1-3.** (Top) Raw fluorescence (A.U.) time course data for the exchange with orange lines showing where the raw time course was trimmed for the fit to the single exponent. (Bottom) Normalised fluorescence data (A.U.) (blue) and single-exponential fits (orange).



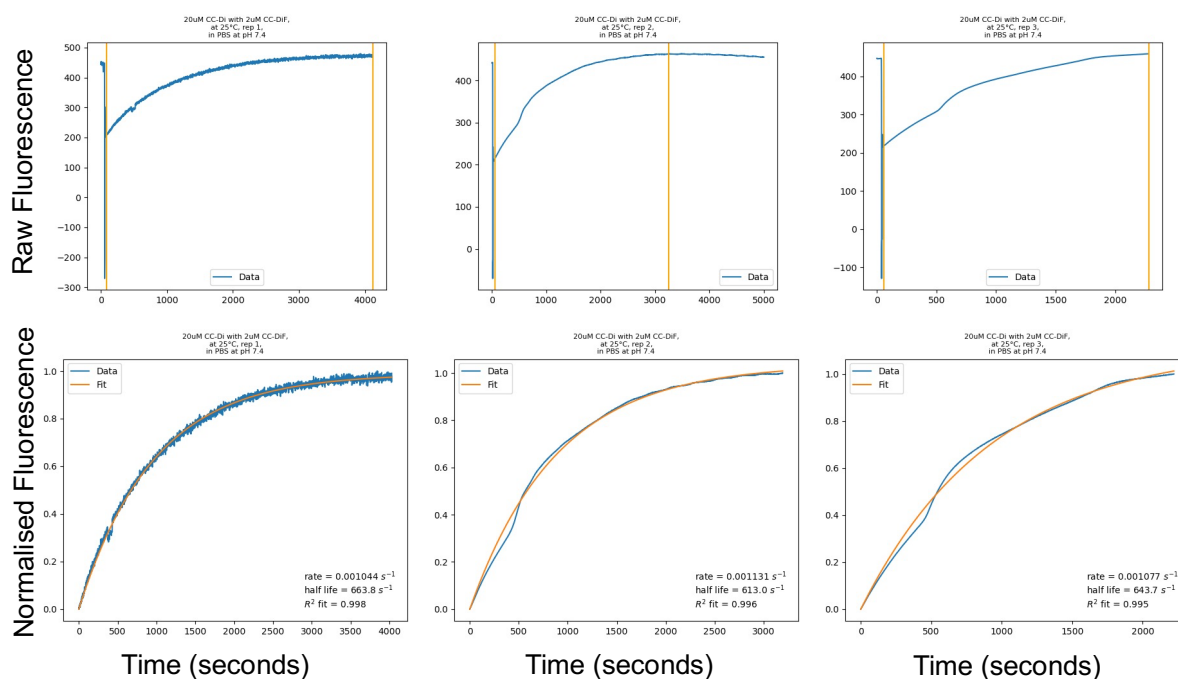

**Figure S4.** Time course data and fits for the exchange of CC-Di (20 μM) and labelled CC-Di (2 μM), replicates 1-3. (Top) Raw fluorescence (A.U.) time course data for the exchange with orange lines showing where the raw time course was trimmed for the fit to the single exponent. (Bottom) Normalised fluorescence data (A.U.) (blue) and single-exponential fits (orange).

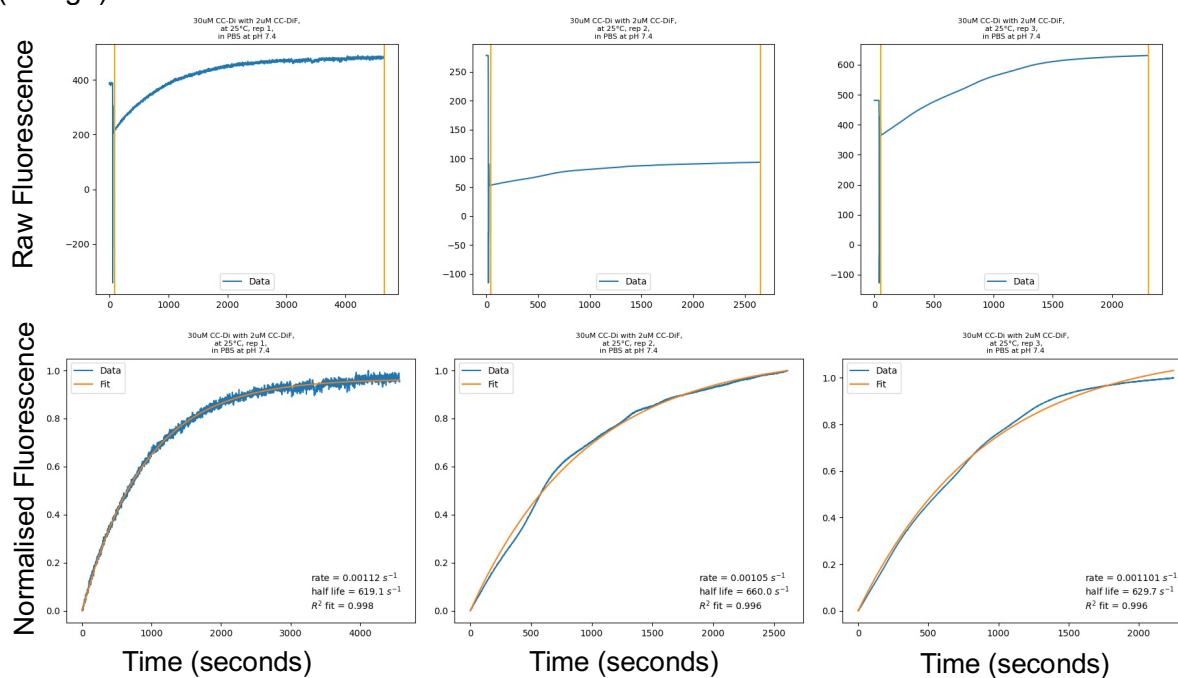

**Figure S5.** Time course data and fits for the exchange of CC-Di (30 μM) and labelled CC-Di (2 μM), replicates 1-3. (Top) Raw fluorescence (A.U.) time course data for the exchange with orange lines showing where the raw time course was trimmed for the fit to the single exponent. (Bottom) Normalised fluorescence data (A.U.) (blue) and single-exponential fits (orange).

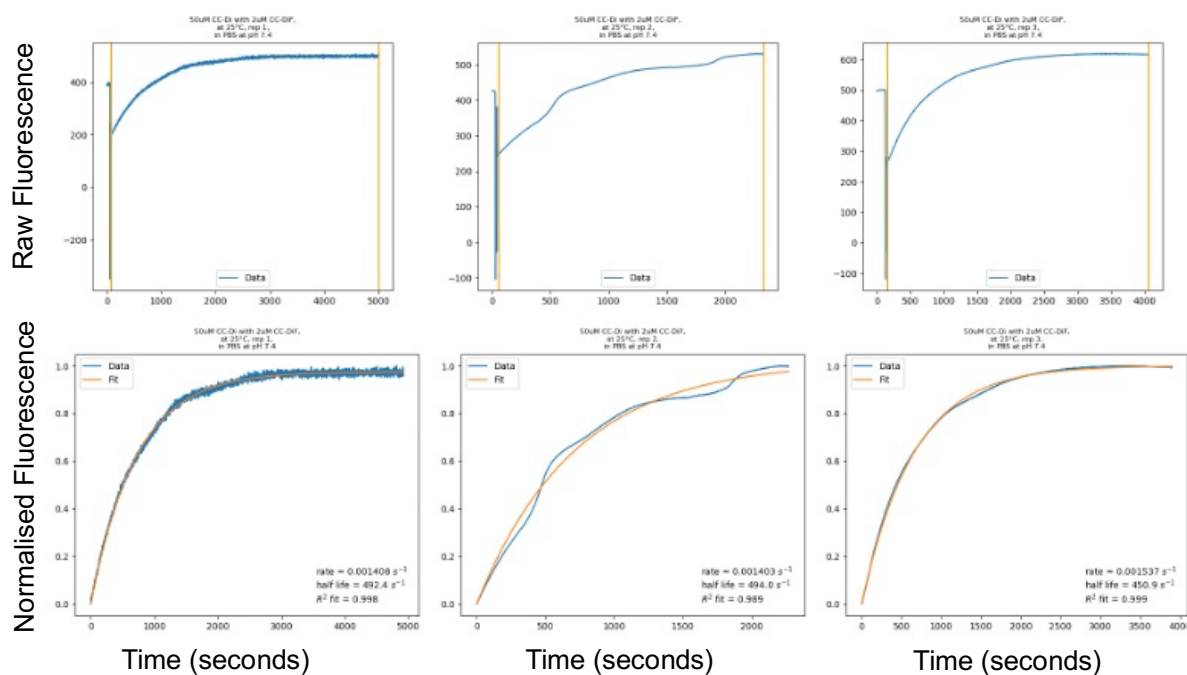

**Figure S6. Time course data and fits for the exchange of CC-Di (50  $\mu\text{M}$ ) and labelled CC-Di (2  $\mu\text{M}$ ), replicates 1-3.** (Top) Raw fluorescence (A.U.) time course data for the exchange with orange lines showing where the raw time course was trimmed for the fit to the single exponent. (Bottom) Normalised fluorescence data (A.U.) (blue) and single-exponential fits (orange).

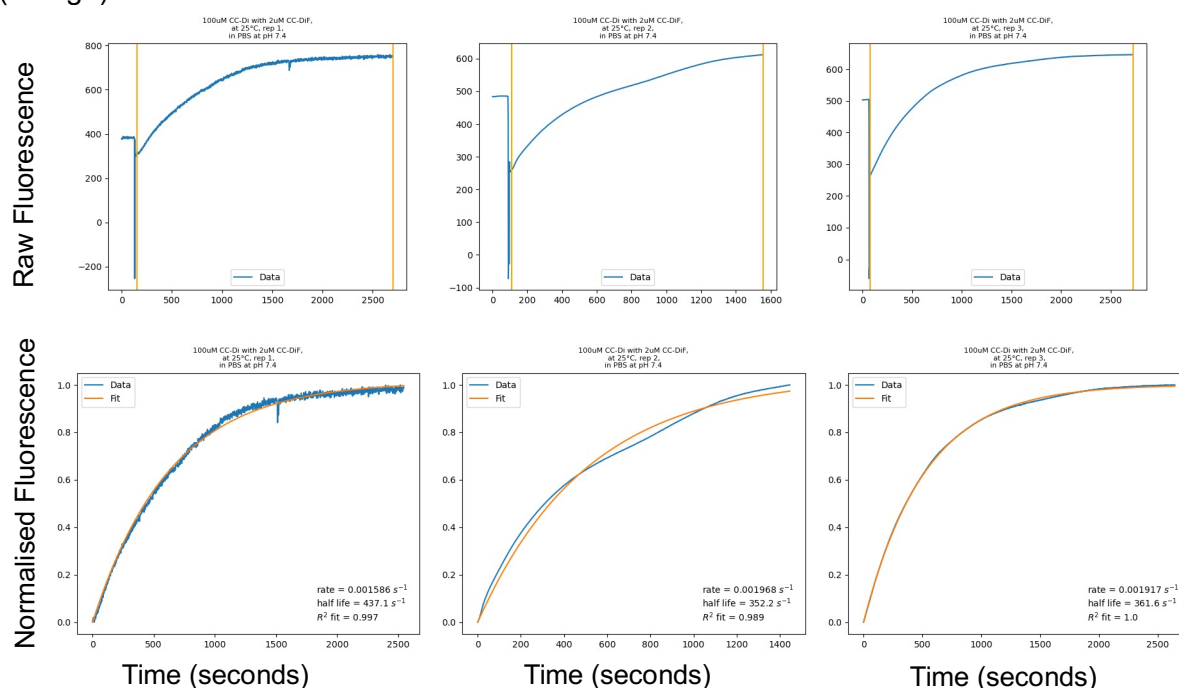

**Figure S7. Time course data and fits for the exchange of CC-Di (100  $\mu\text{M}$ ) and labelled CC-Di (2  $\mu\text{M}$ ), replicates 1-3.** (Top) Raw fluorescence (A.U.) time course data for the exchange with orange lines showing where the raw time course was trimmed for the fit to the single exponent. (Bottom) Normalised fluorescence data (A.U.) (blue) and single-exponential fits (orange).

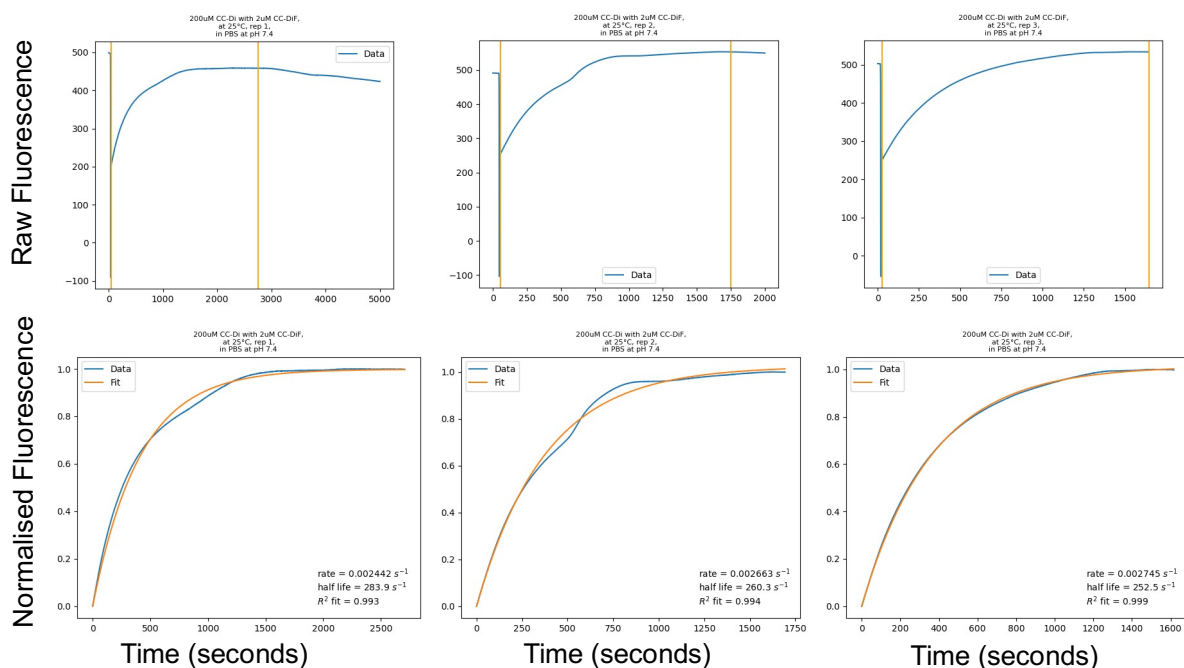

**Figure S8. Time course data and fits for the exchange of CC-Di (200  $\mu\text{M}$ ) and labelled CC-Di (2  $\mu\text{M}$ ), replicates 1-3.** (Top) Raw fluorescence (A.U.) time course data for the exchange with orange lines showing where the raw time course was trimmed for the fit to the single exponent. (Bottom) Normalised fluorescence data (A.U.) (blue) and single-exponential fits (orange).

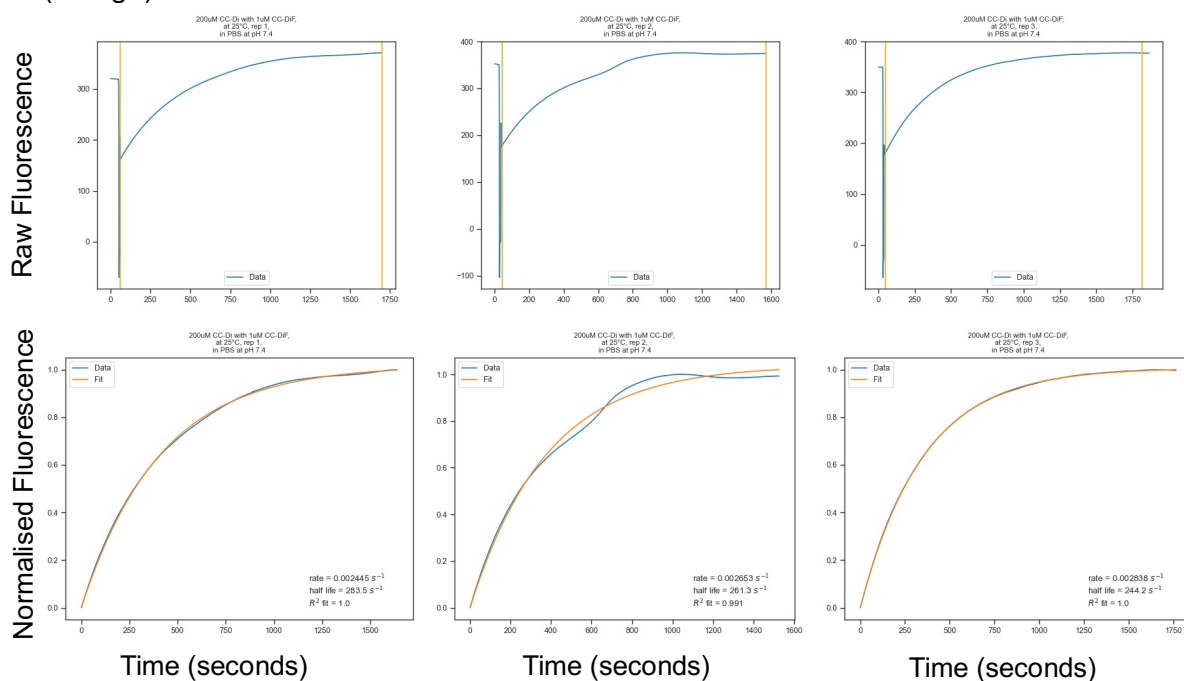

**Figure S9. Time course data and fits for the exchange of CC-Di (200  $\mu\text{M}$ ) and labelled CC-Di (1  $\mu\text{M}$ ), replicates 1-3.** (Top) Raw fluorescence (A.U.) time course data for the exchange with orange lines showing where the raw time course was trimmed for the fit to the single exponent. (Bottom) Normalised fluorescence data (A.U.) (blue) and single-exponential fits (orange).

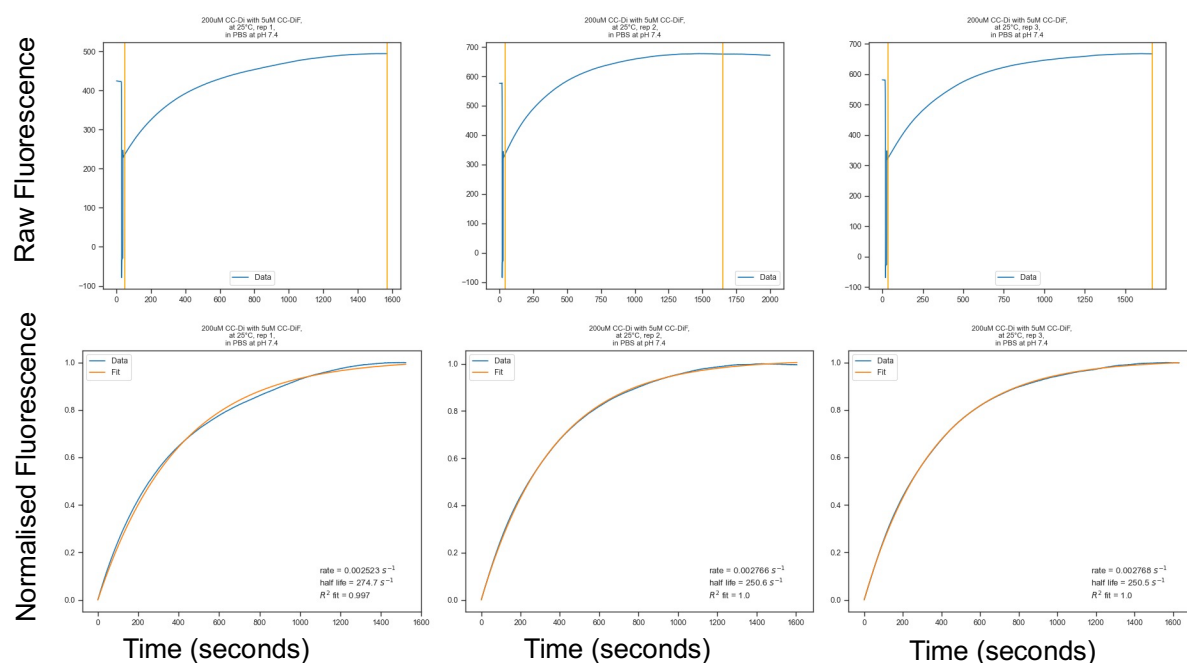

**Figure S10. Time course data and fits for the exchange of CC-Di (200  $\mu\text{M}$ ) and labelled CC-Di (5  $\mu\text{M}$ ), replicates 1-3.** (Top) Raw fluorescence (A.U.) time course data for the exchange with orange lines showing where the raw time course was trimmed for the fit to the single exponent. (Bottom) Normalised fluorescence data (A.U.) (blue) and single-exponential fits (orange).

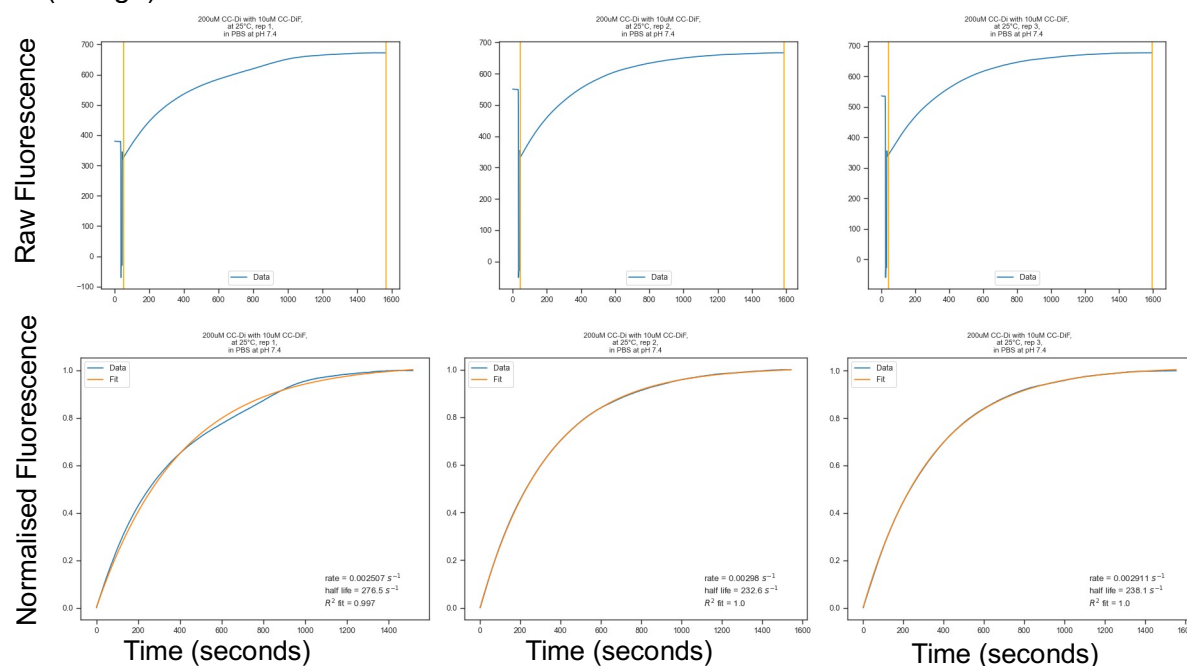

**Figure S11. Time course data and fits for the exchange of CC-Di (200  $\mu\text{M}$ ) and labelled CC-Di (10  $\mu\text{M}$ ), replicates 1-3.** (Top) Raw fluorescence (A.U.) time course data for the exchange with orange lines showing where the raw time course was trimmed for the fit to the single exponent. (Bottom) Normalised fluorescence data (A.U.) (blue) and single-exponential fits (orange).

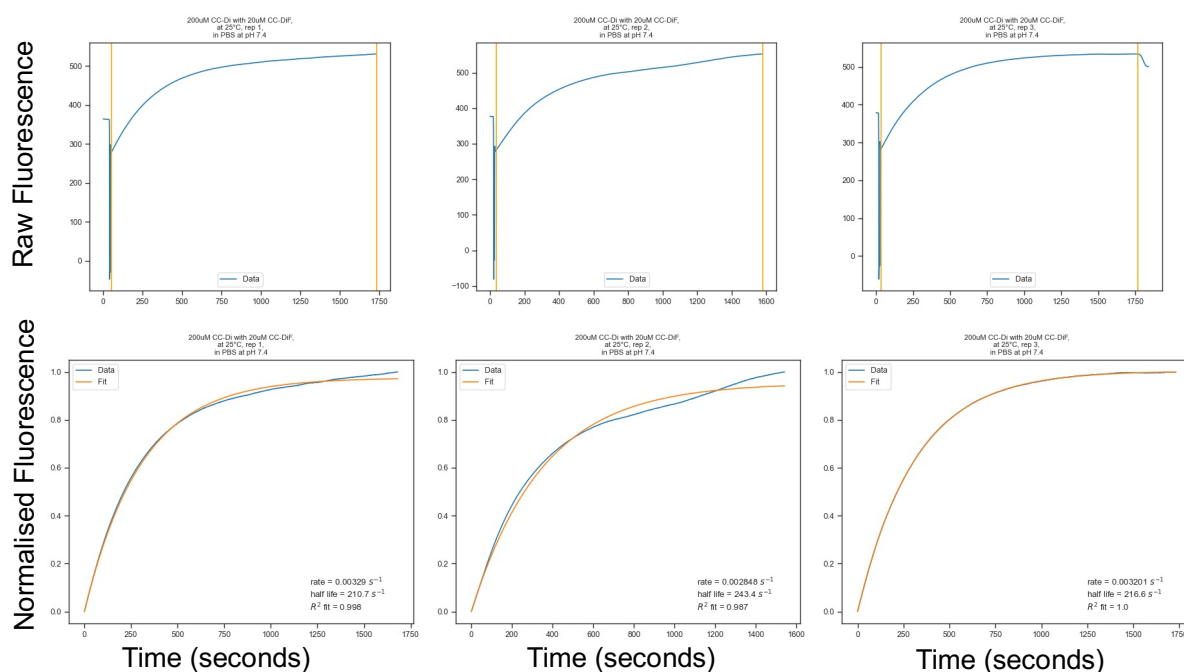

**Figure S12. Time course data and fits for the exchange of CC-Di (200  $\mu\text{M}$ ) and labelled CC-Di (20  $\mu\text{M}$ ), replicates 1-3.** (Top) Raw fluorescence (A.U.) time course data for the exchange with orange lines showing where the raw time course was trimmed for the fit to the single exponent. (Bottom) Normalised fluorescence data (A.U.) (blue) single-exponential fits (orange).

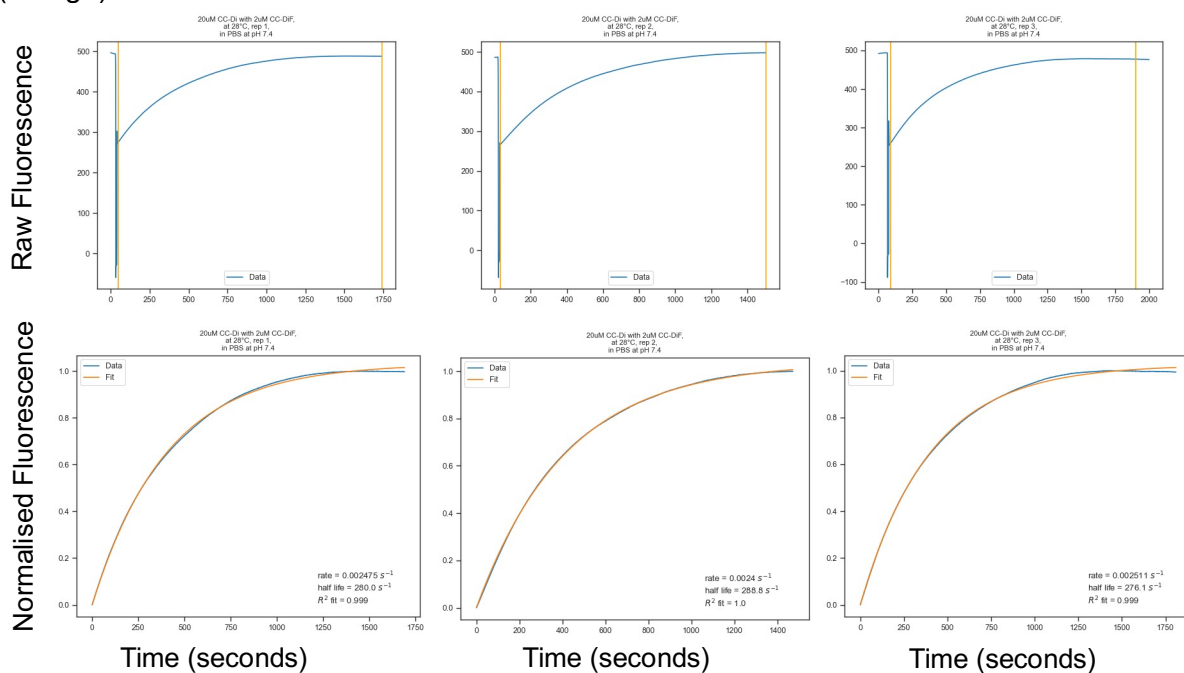

**Figure S13. Time course data and fits for the exchange of CC-Di (20  $\mu\text{M}$ ) and labelled CC-Di (2  $\mu\text{M}$ ), replicates 1-3 at 28  $^{\circ}\text{C}$ .** (Top) Raw fluorescence (A.U.) time course data for the exchange with orange lines showing where the raw time course was trimmed for the fit to the single exponent. (Bottom) Normalised fluorescence data (A.U.) (blue) and single-exponential fits (orange).

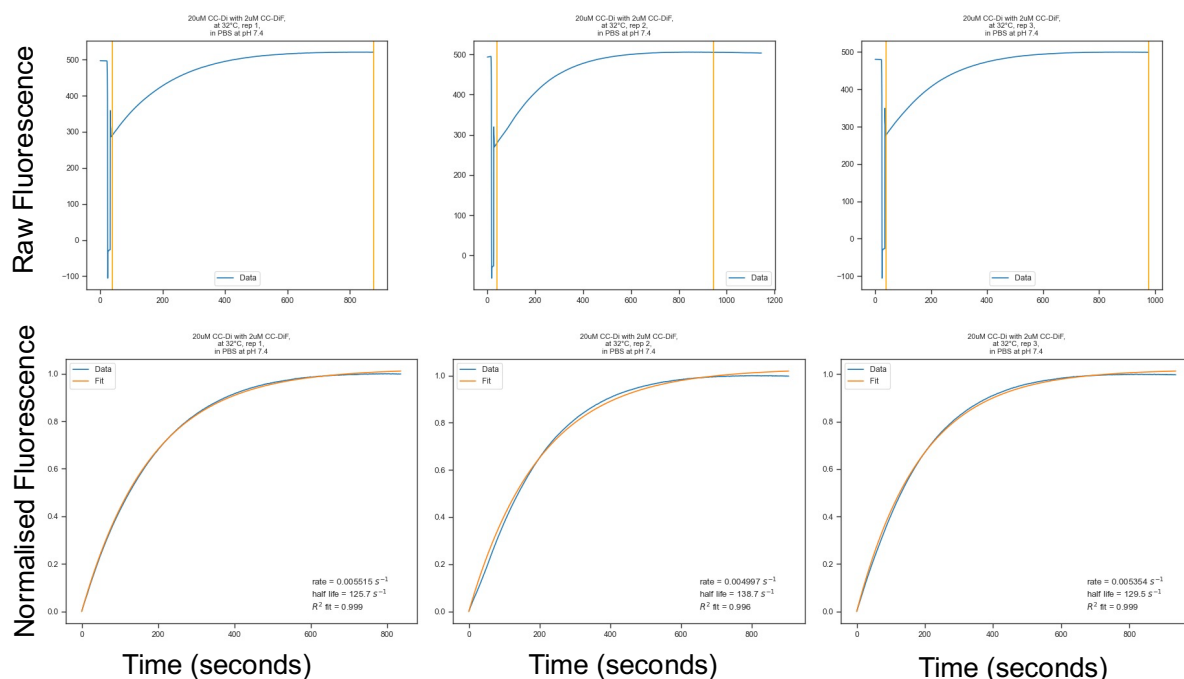

**Figure S14.** Time course data and fits for the exchange of CC-Di (20  $\mu\text{M}$ ) and labelled CC-Di (2  $\mu\text{M}$ ), replicates 1-3 at 32  $^{\circ}\text{C}$ . (Top) Raw fluorescence (A.U.) time course data for the exchange with orange lines showing where the raw time course was trimmed for the fit to the single exponent. (Bottom) Normalised fluorescence data (A.U.) (blue) and single-exponential fits (orange).

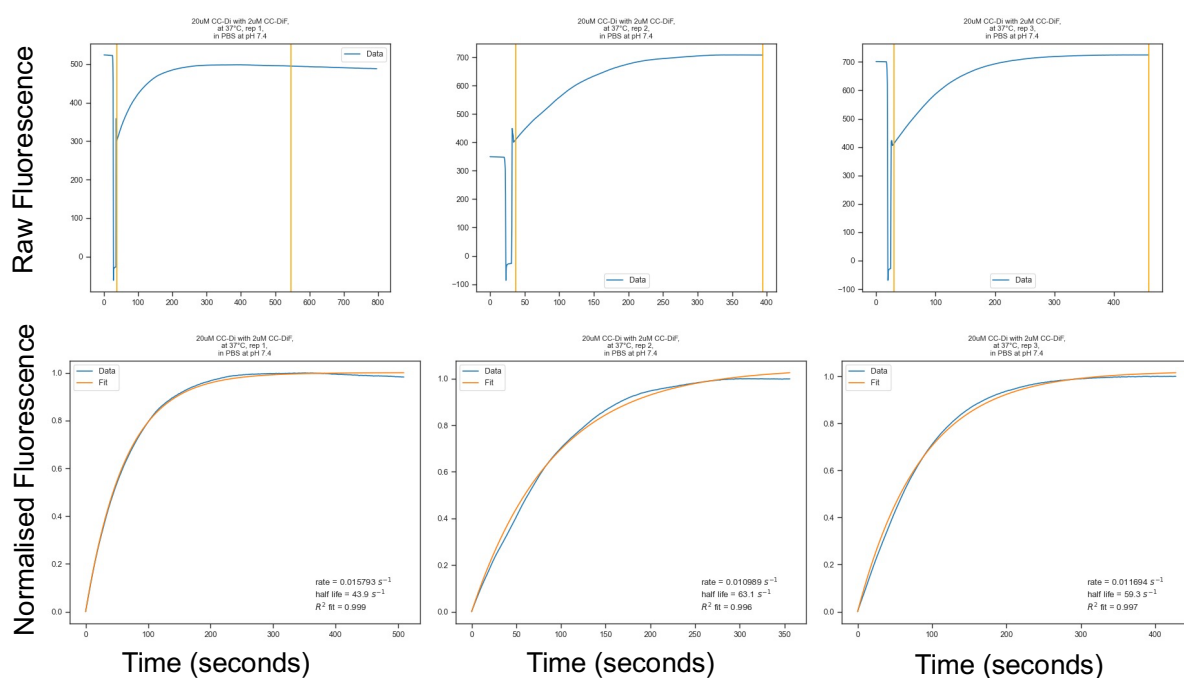

**Figure S15.** Time course data and fits for the exchange of CC-Di (20  $\mu\text{M}$ ) and labelled CC-Di (2  $\mu\text{M}$ ), replicates 1-3 at 37  $^{\circ}\text{C}$ . (Top) Raw fluorescence (A.U.) time course data for the exchange with orange lines showing where the raw time course was trimmed for the fit to the single exponent. (Bottom) Normalised fluorescence data (A.U.) (blue) and single-exponential fits (orange).

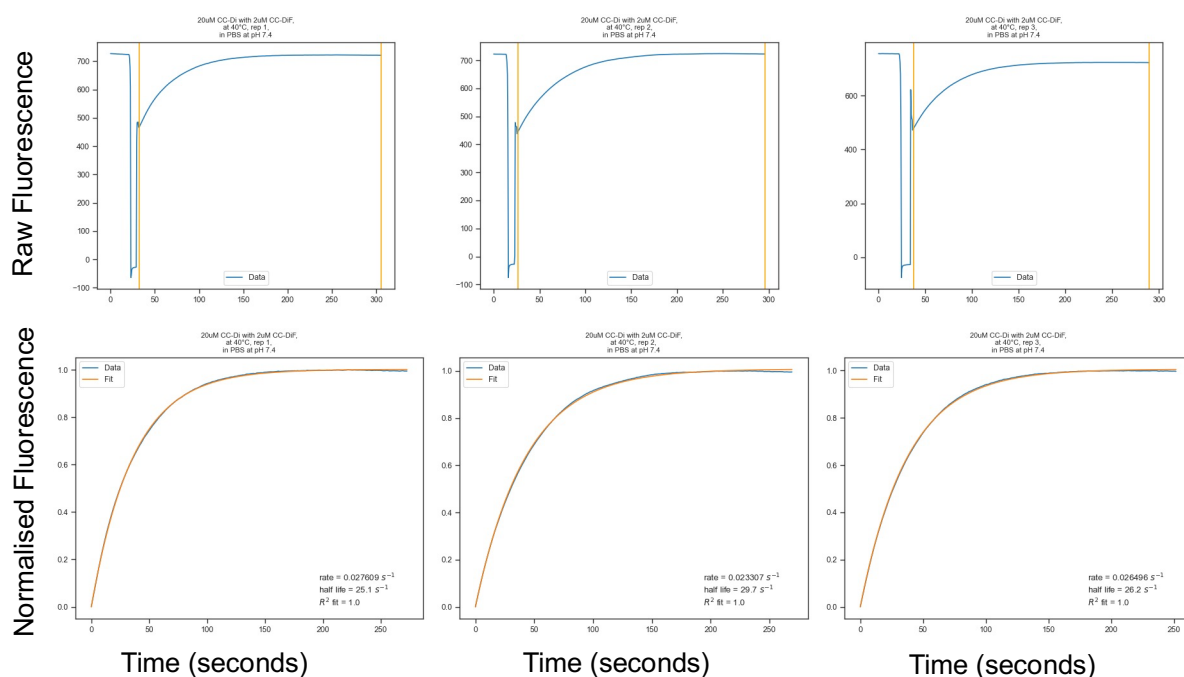

**Figure S16.** Time course data and fits for the exchange of CC-Di (20  $\mu\text{M}$ ) and labelled CC-Di (2  $\mu\text{M}$ ), replicates 1-3 at 40  $^{\circ}\text{C}$ . (Top) Raw fluorescence (A.U.) time course data for the exchange with orange lines showing where the raw time course was trimmed for the fit to the single exponent. (Bottom) Normalised fluorescence data (A.U.) (blue) and single-exponential fits (orange).

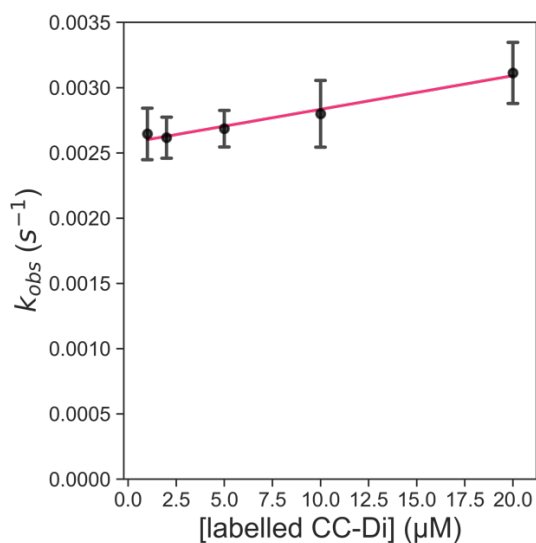

**Figure S17.** Plot of the rate ( $k_{obs}$ ) of exchange of 200  $\mu\text{M}$  unlabelled CC-Di with variable concentrations of labelled CC-Di (1-20  $\mu\text{M}$ ). Data points are shown as the average of 3 independent replicates, error bars are shown to 1 standard deviation, and the line of best fit is also shown.

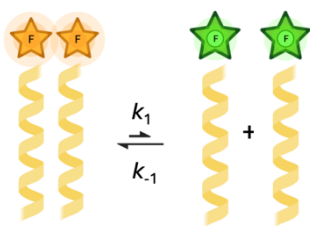

**Scheme S1.** Scheme of FAM-CC-Di dissociation.





| FAM-CC-Di ( $\mu\text{M}$ )                 |                       |                       |                       |                       |                       |                       |                       |                       |                       |
|---------------------------------------------|-----------------------|-----------------------|-----------------------|-----------------------|-----------------------|-----------------------|-----------------------|-----------------------|-----------------------|
| Total Concentration CC-Di ( $\mu\text{M}$ ) | 2                     | 5                     | 10                    | 20                    | 30                    | 50                    | 100                   | 200                   |                       |
| [L] ( $\mu\text{M}$ )                       | $1.15 \times 10^{-2}$ | $1.15 \times 10^{-2}$ | $1.15 \times 10^{-2}$ | $1.15 \times 10^{-2}$ | $1.15 \times 10^{-2}$ | $1.15 \times 10^{-2}$ | $1.15 \times 10^{-2}$ | $1.15 \times 10^{-2}$ | $3.65 \times 10^{-2}$ |
| [LL] ( $\mu\text{M}$ )                      | 1.99                  | 1.99                  | 1.99                  | 1.99                  | 1.99                  | 1.99                  | 1.988                 | 20.0                  |                       |
| [U] ( $\mu\text{M}$ )                       | $1.15 \times 10^{-2}$ | $1.82 \times 10^{-2}$ | $2.58 \times 10^{-2}$ | $3.65 \times 10^{-2}$ | $4.47 \times 10^{-2}$ | $5.77 \times 10^{-2}$ | $8.16 \times 10^{-2}$ | $1.15 \times 10^{-1}$ |                       |
| [UU] ( $\mu\text{M}$ )                      | 1.99                  | 4.98                  | 9.97                  | 20.0                  | 30.0                  | 59.9                  | 99.9                  | 200                   |                       |

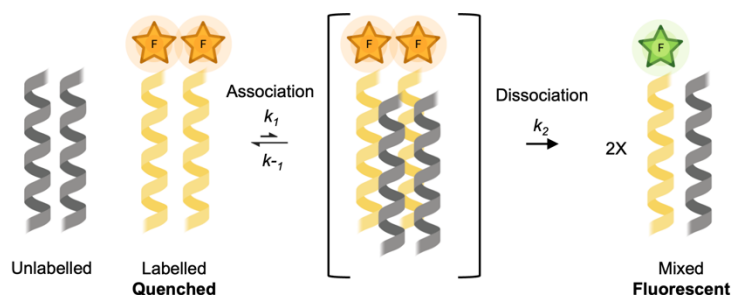

**Scheme S3.** Proposed mechanism 1 of exchange of FAM-CC-Di and CC-Di.

The rate of growth of fluorescence is the same as the rate of growth of dimers consisting of 1 copy of FAM-CC-Di and one copy of CC-Di (LU).

$$\text{Rate} = \frac{d[UL]}{dt} = 2k_2[UULL]$$

Applying the steady-state approximation to the tetramer:

$$\frac{d[UULL]}{dt} = k_1[UU][LL] - k_{-1}[UULL] - k_2[UULL] = 0$$

So

$$[UULL] = \frac{k_1}{k_{-1} + k_2} [UU][LL]$$

And

$$\text{Rate} = \frac{d[UL]}{dt} = \frac{2k_2k_1}{k_{-1} + k_2} [UU][LL]$$

If [UU] is much greater than [LL] then pseudo-first-order kinetics apply and we can write:

$$\text{Rate} = \frac{d[UL]}{dt} = k_{obs}[LL]$$

Where the pseudo-first-order rate constant  $k_{obs}$  is:

$$k_{obs} = \frac{2k_2k_1}{k_{-1} + k_2} [UU]$$

Hence a plot of  $k_{obs}$  vs [UU] will be linear with gradient  $\frac{2k_2k_1}{k_{-1} + k_2}$ .

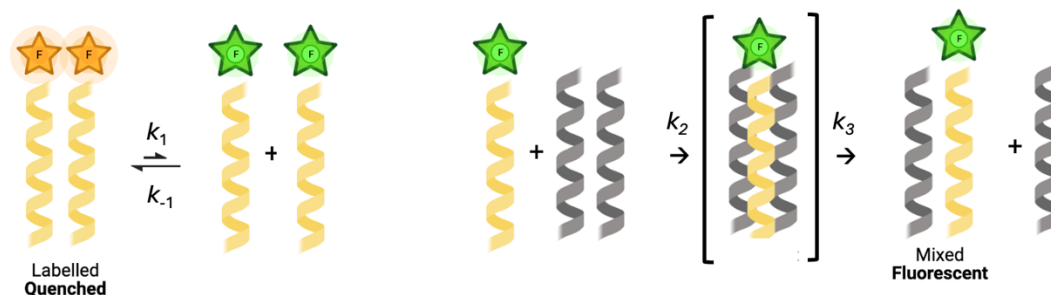

**Scheme S4.** Proposed mechanism 2 of exchange of FAM-CC-Di and CC-Di.

The rate of growth of fluorescence is the same as the rate of growth of dimers consisting of 1 copy of FAM-CC-Di and one copy of CC-Di ( $LU$ ) if fluorescence from dissociated monomeric FAM-CC-Di and from the trimeric steady-state intermediate is negligible. This is likely accurate as the monomeric and trimeric species are unstable and only present at low concentrations at any given time.

$$\text{Rate} = \frac{d[LU]}{dt} = k_3[LUU]$$

We can also write

$$\frac{d[LUU]}{dt} = k_2[L][UU] - k_3[LUU]$$

and apply the steady state approximation to the intermediate so

$$\frac{d[LUU]}{dt} = 0$$

Hence  $k_2[L][UU] = k_3[LUU]$  and

$$\text{Rate} = \frac{d[LU]}{dt} = k_2[L][UU]$$

Which is first order in  $[UU]$  and  $[L]$ .

If we assume the dissociation of dimeric FAM-CC-Di is at equilibrium, then the equilibrium constant is  $K = [L]^2/[LL]$  and hence  $[L] = K^{1/2} [LL]^{1/2}$ . Substituting to the rate expression gives:

$$\text{Rate} = \frac{d[LU]}{dt} = k_2 K^{1/2} [LL]^{1/2} [UU]$$

Under experimental conditions in which  $[UU] \gg [LL]$ , we can write:

$$\text{Rate} = \frac{d[LU]}{dt} = k_{obs} [LL]^{1/2}$$

Where  $k_{obs} = k_2 K^{1/2} [UU]$ . Hence a plot of  $k_{obs}$  vs  $[UU]$  should be linear (Figure 1C) with gradient  $k_2 K^{1/2}$ .

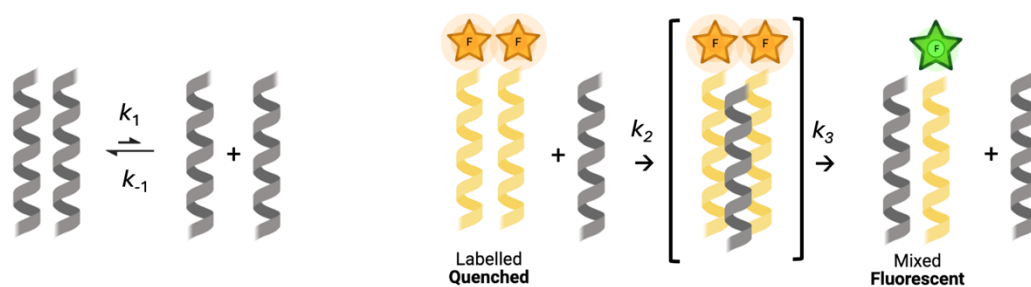

**Scheme S5.** Proposed mechanism 3 of exchange of FAM-CC-Di and CC-Di.

The rate of growth of fluorescence is the same as the rate of growth of dimers consisting of 1 copy of FAM-CC-Di and one copy of CC-Di ( $LU$ ).

$$\text{Rate} = \frac{d[LU]}{dt} = k_3[LLU]$$

We can also write

$$\frac{d[LLU]}{dt} = k_2[LL][U] - k_3[LLU]$$

and apply the steady state approximation to the intermediate so

$$\frac{d[LLU]}{dt} = 0$$

Hence  $k_2[LL][U] = k_3[LLU]$  and

$$\text{Rate} = \frac{d[LU]}{dt} = k_2[LL][U]$$

Which is first order in  $[UU]$  and  $[L]$ .

If we assume the dissociation of dimeric CC-Di is at equilibrium, then the equilibrium constant is  $K = [U]^2/[UU]$  and hence  $[U] = K^{1/2} [UU]^{1/2}$ . Substituting to the rate expression gives:

$$\text{Rate} = \frac{d[LU]}{dt} = k_2 K^{1/2} [UU]^{1/2} [LL]$$

Under experimental conditions in which  $[UU] \gg [LL]$ , we can write:

$$\text{Rate} = \frac{d[LU]}{dt} = k_{obs} [LL]$$

Where  $k_{obs} = k_2 K^{1/2} [UU]^{1/2}$ . Hence a plot of  $k_{obs}$  vs  $[UU]^{1/2}$  should be linear with gradient  $k_2 K^{1/2}$ .

Table S3. Data for the exponential fits for the exchange of CC-Di

| Temperature (°C)                            | [CC-Di] Unlabelled ( $\mu\text{M}$ ) | [CC-Di] Labelled ( $\mu\text{M}$ ) | Replicate # | Rate ( $k_{\text{obs}}$ , $\text{s}^{-1}$ ) | Half-life ( $t_{1/2}$ , s) | R <sup>2</sup> score of the fit |
|---------------------------------------------|--------------------------------------|------------------------------------|-------------|---------------------------------------------|----------------------------|---------------------------------|
| <i>Data for constant [CC-Di] Unlabelled</i> |                                      |                                    |             |                                             |                            |                                 |
| 25                                          | 200                                  | 1                                  | 1           | 0.00244                                     | 284                        | 0.999                           |
| 25                                          | 200                                  | 1                                  | 2           | 0.00265                                     | 261                        | 0.991                           |
| 25                                          | 200                                  | 1                                  | 3           | 0.00284                                     | 244                        | 0.999                           |
| 25                                          | 200                                  | 2                                  | 1           | 0.00244                                     | 284                        | 0.993                           |
| 25                                          | 200                                  | 2                                  | 2           | 0.00266                                     | 260                        | 0.993                           |
| 25                                          | 200                                  | 2                                  | 3           | 0.00275                                     | 253                        | 0.999                           |
| 25                                          | 200                                  | 5                                  | 1           | 0.00252                                     | 275                        | 0.997                           |
| 25                                          | 200                                  | 5                                  | 2           | 0.00277                                     | 251                        | 0.999                           |
| 25                                          | 200                                  | 5                                  | 3           | 0.00277                                     | 250                        | 0.999                           |
| 25                                          | 200                                  | 10                                 | 1           | 0.00251                                     | 276                        | 0.996                           |
| 25                                          | 200                                  | 10                                 | 2           | 0.00298                                     | 233                        | 0.999                           |
| 25                                          | 200                                  | 10                                 | 3           | 0.00291                                     | 238                        | 0.999                           |
| 25                                          | 200                                  | 20                                 | 1           | 0.00329                                     | 211                        | 0.997                           |
| 25                                          | 200                                  | 20                                 | 2           | 0.00285                                     | 243                        | 0.987                           |
| 25                                          | 200                                  | 20                                 | 3           | 0.00320                                     | 217                        | 0.999                           |
| <i>Data for constant [CC-Di] Labelled</i>   |                                      |                                    |             |                                             |                            |                                 |
| 25                                          | 2                                    | 2                                  | 1           | 0.00118                                     | 589                        | 0.952                           |
| 25                                          | 2                                    | 2                                  | 2           | 0.000574                                    | 1207                       | 0.995                           |
| 25                                          | 2                                    | 2                                  | 3           | 0.000896                                    | 774                        | 0.997                           |
| 25                                          | 5                                    | 2                                  | 1           | 0.00114                                     | 606                        | 0.984                           |
| 25                                          | 5                                    | 2                                  | 2           | 0.000917                                    | 756                        | 0.996                           |
| 25                                          | 5                                    | 2                                  | 3           | 0.000670                                    | 1035                       | 0.981                           |
| 25                                          | 10                                   | 2                                  | 1           | 0.000967                                    | 717                        | 0.989                           |
| 25                                          | 10                                   | 2                                  | 2           | 0.000813                                    | 852                        | 0.998                           |
| 25                                          | 10                                   | 2                                  | 3           | 0.000785                                    | 883                        | 0.999                           |

|                                    |     |   |   |         |      |       |
|------------------------------------|-----|---|---|---------|------|-------|
| 25                                 | 20  | 2 | 1 | 0.00104 | 664  | 0.998 |
| 25                                 | 20  | 2 | 2 | 0.00113 | 613  | 0.996 |
| 25                                 | 20  | 2 | 3 | 0.00108 | 644  | 0.995 |
| 25                                 | 30  | 2 | 1 | 0.00112 | 619  | 0.998 |
| 25                                 | 30  | 2 | 2 | 0.00105 | 660  | 0.996 |
| 25                                 | 30  | 2 | 3 | 0.00110 | 630  | 0.996 |
| 25                                 | 50  | 2 | 1 | 0.00141 | 492  | 0.998 |
| 25                                 | 50  | 2 | 2 | 0.00140 | 494  | 0.989 |
| 25                                 | 50  | 2 | 3 | 0.00154 | 451  | 0.999 |
| 25                                 | 100 | 2 | 1 | 0.00159 | 437  | 0.997 |
| 25                                 | 100 | 2 | 2 | 0.00197 | 352  | 0.989 |
| 25                                 | 100 | 2 | 3 | 0.00192 | 362  | 0.99  |
| 25                                 | 200 | 2 | 1 | 0.00244 | 284  | 0.993 |
| 25                                 | 200 | 2 | 2 | 0.00266 | 260  | 0.994 |
| 25                                 | 200 | 2 | 3 | 0.00275 | 253  | 0.999 |
| <i>Data for the Arrhenius plot</i> |     |   |   |         |      |       |
| 25                                 | 20  | 2 | 1 | 0.00104 | 664  | 0.998 |
| 25                                 | 20  | 2 | 2 | 0.00113 | 613  | 0.996 |
| 25                                 | 20  | 2 | 3 | 0.00108 | 644  | 0.995 |
| 28                                 | 20  | 2 | 1 | 0.00248 | 280  | 0.999 |
| 28                                 | 20  | 2 | 2 | 0.00240 | 289  | 0.999 |
| 28                                 | 20  | 2 | 3 | 0.00251 | 276  | 0.999 |
| 32                                 | 20  | 2 | 1 | 0.00551 | 126  | 0.999 |
| 32                                 | 20  | 2 | 2 | 0.00500 | 139  | 0.996 |
| 32                                 | 20  | 2 | 3 | 0.00535 | 129  | 0.999 |
| 37                                 | 20  | 2 | 1 | 0.0158  | 43.9 | 0.999 |
| 37                                 | 20  | 2 | 2 | 0.0110  | 63.1 | 0.996 |
| 37                                 | 20  | 2 | 3 | 0.0117  | 59.3 | 0.997 |

|    |    |   |   |        |      |       |
|----|----|---|---|--------|------|-------|
| 40 | 20 | 2 | 1 | 0.0276 | 25.1 | 0.999 |
| 40 | 20 | 2 | 2 | 0.0233 | 29.7 | 0.999 |
| 40 | 20 | 2 | 3 | 0.0265 | 26.2 | 0.999 |

Table S4. Data for the fit to the Arrhenius equation and subsequent activation energy calculation.

| Temperature (°C)                                             | Rate ( $k_{\text{obs}}$ , $\text{s}^{-1}$ )<br>(average of 3 replicates) | 1/T ( $\text{K}^{-1}$ ) | ln( $k_{\text{obs}}$ ) |
|--------------------------------------------------------------|--------------------------------------------------------------------------|-------------------------|------------------------|
| 25                                                           | 0.00108                                                                  | 0.00335                 | -6.83                  |
| 28                                                           | 0.00246                                                                  | 0.00332                 | -6.01                  |
| 32                                                           | 0.00529                                                                  | 0.00328                 | -5.24                  |
| 37                                                           | 0.0128                                                                   | 0.00322                 | -4.36                  |
| 40                                                           | 0.0258                                                                   | 0.00319                 | -3.66                  |
| Slope (Ea/R)                                                 | -19036                                                                   |                         |                        |
| Intercept (lnA)                                              | 57.105                                                                   |                         |                        |
| R (molar gas constant) ( $\text{J K}^{-1} \text{mol}^{-1}$ ) | 8.3144598                                                                |                         |                        |
| Activation Energy ( $\text{J mol}^{-1}$ )                    | 158274                                                                   |                         |                        |
| Activation Energy ( $\text{kJ mol}^{-1}$ )                   | 158.274                                                                  |                         |                        |
| Activation Energy ( $\text{kcal mol}^{-1}$ )                 | 37.8                                                                     |                         |                        |
| R <sup>2</sup> of linear regression                          | 0.996                                                                    |                         |                        |

Table S5. CC Basis Set Sequences

| <b><i>g</i>-Register CC</b> | <b><i>gabcdef gabcdef gabcdef gabcdef</i></b>   | <b>Monoisotopic Mass</b> |
|-----------------------------|-------------------------------------------------|--------------------------|
| CC-Di                       | Ac-G EIAALKQ EIAALKK ENAALKW EIAALKQ G-CONH2    | 3246.9                   |
| FAM-CC-Di                   | FAM-GGG EIAALKQ EIAALKK ENAALKW EIAALKQ G-CONH2 | 3737.0                   |
| CC-Tri                      | Ac-G EIAAIKQ EIAAIKK EIAAIKW EIAAIKQ G-CONH2    | 3245.9                   |
| FAM-CC-Tri                  | FAM-GGG EIAAIKQ EIAAIKK EIAAIKW EIAAIKQ G-CONH2 | 3735.0                   |
| CC-Tet                      | Ac-G ELAAIKQ ELAAIKK ELAAIKW ELAAIKQ G-CONH2    | 3245.9                   |
| FAM-CC-Tet                  | FAM-GGG ELAAIKQ ELAAIKK ELAAIKW ELAAIKQ G-CONH2 | 3735.0                   |
| <b><i>c</i>-Register CC</b> | <b><i>cdefgab cdefgab cdefgab cdefgab</i></b>   |                          |
| CC-Pent2                    | Ac-G EIAQTLK EIAKTLK EIAWTLK EIAQTLK G-CONH2    | 3365.9                   |
| FAM-CC-Pent2                | FAM-GGG EIAQTLK EIAKTLK EIAWTLK EIAQTLK G-CONH2 | 3855.0                   |
| CC-Hex2                     | Ac-G EIAQSLK EIAKSLK EIAWSLK EIAQSLK G-CONH2    | 3309.9                   |
| FAM-CC-Hex2                 | FAM-GGG EIAQSLK EIAKSLK EIAWSLK EIAQSLK G-CONH2 | 3800.0                   |
| CC-Hept                     | Ac-G EIAQALK EIAKALK EIAWALK EIAQALK G-CONH2    | 3245.9                   |
| FAM-CC-Hept                 | FAM-GGG EIAQALK EIAKALK EIAWALK EIAQALK G-CONH2 | 3735.0                   |

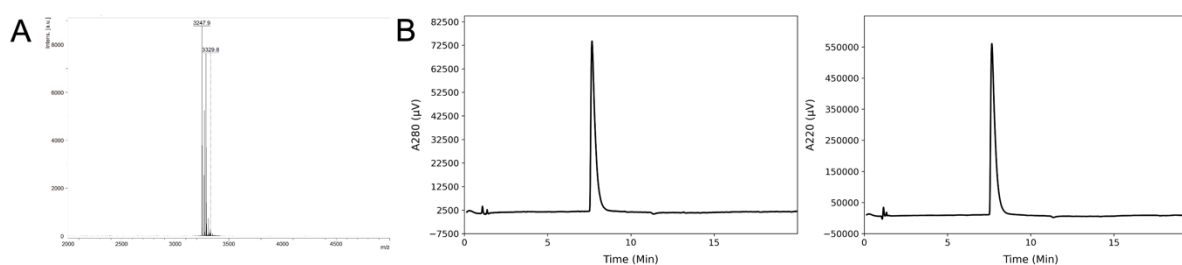

**Figure S18. CC-Di MALDI and AHPLC data.** (A) MALDI-TOF MS analysis of purified CC-Di. Monoisotopic  $[M+H]$  peaks were observed at 3247.9; calculated  $m/z$  is 3246.9. (B) Analytical HPLC trace of purified CC-Di. Chromatograms were monitored at 280 (left) and 220 (right) nm wavelengths.

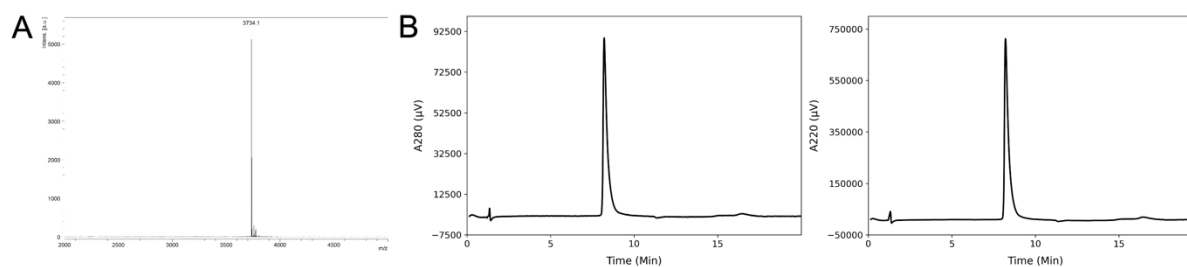

**Figure S19. FAM-CC-Di MALDI and AHPLC data.** (A) MALDI-TOF MS analysis of purified FAM-CC-Di. Monoisotopic  $[M+H]$  peaks were observed at 3734.1; calculated  $m/z$  is 3737.0. (B) Analytical HPLC trace of purified FAM-CC-Di. Chromatograms were monitored at 280 (left) and 220 (right) nm wavelengths.

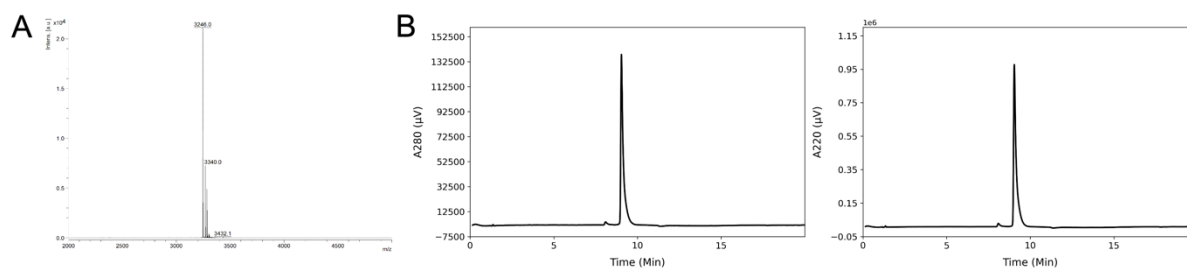

**Figure S20. CC-Tri MALDI and AHPLC data.** (A) MALDI-TOF MS analysis of purified CC-Tri. Monoisotopic  $[M+H]$  peaks were observed at 3246.0; calculated  $m/z$  is 3245.9. (B)

Analytical HPLC trace of purified CC-Tri. Chromatograms were monitored at 280 (left) and 220 (right) nm wavelengths

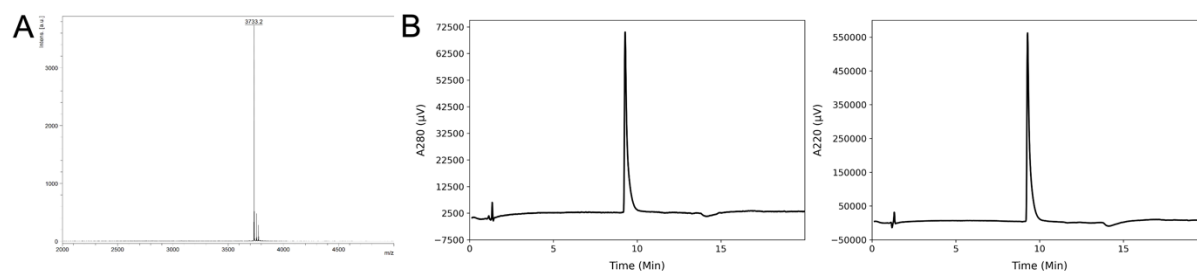

**Figure S21. FAM-CC-Tri MALDI and AHPLC data.** (A) MALDI-TOF MS analysis of purified FAM-CC-Tri. Monoisotopic [M+H] peaks were observed at 3733.2; calculated  $m/z$  is 3735.0. (B) Analytical HPLC trace of purified FAM-CC-Tri. Chromatograms were monitored at 280 (left) and 220 (right) nm wavelengths.

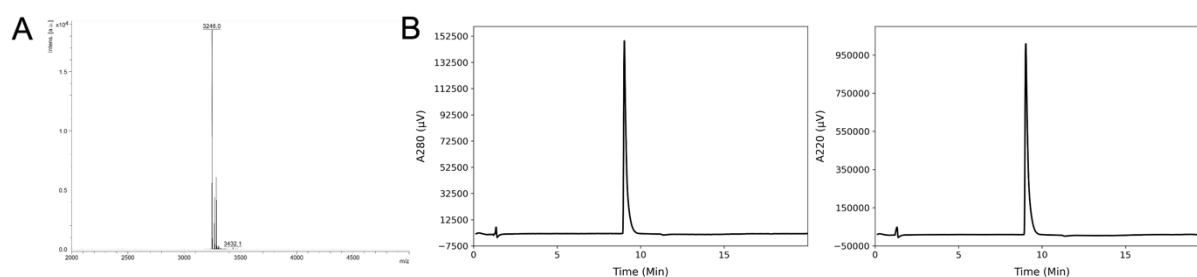

**Figure 22. CC-Tet MALDI and AHPLC data.** (A) MALDI-TOF MS analysis of purified CC-Tet. Monoisotopic [M+H] peaks were observed at 3246.0; calculated  $m/z$  is 3245.9. (B) Analytical HPLC trace of purified CC-Tet. Chromatograms were monitored at 280 (left) and 220 (right) nm wavelengths.

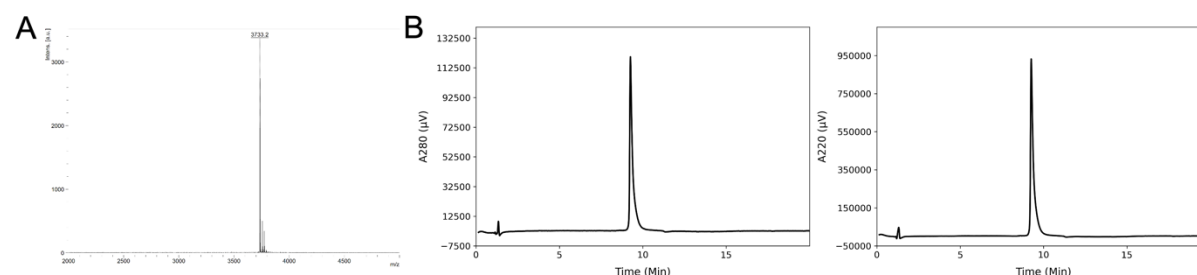

**Figure S23. FAM-CC-Tet MALDI and AHPLC data.** (A) MALDI-TOF MS analysis of purified FAM-CC-Tet. Monoisotopic [M+H] peaks were observed at 3733.2; calculated  $m/z$  is 3735.0. (B) Analytical HPLC trace of purified FAM-CC-Tet. Chromatograms were monitored at 280 (left) and 220 (right) nm wavelengths.

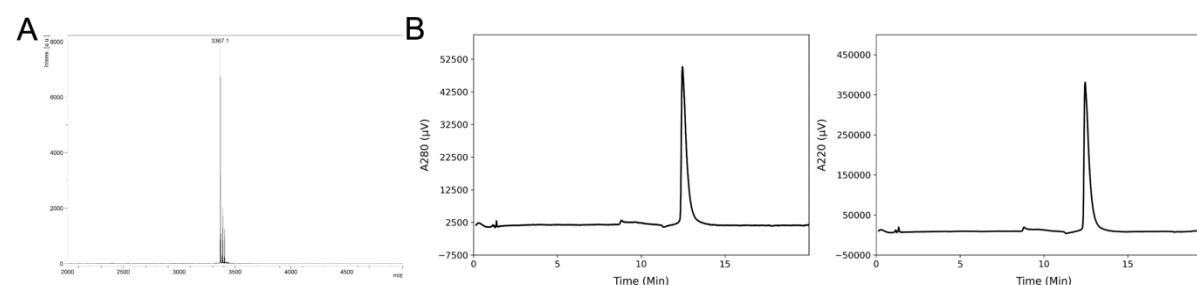

**Figure S24. CC-Pent2 MALDI and AHPLC data.** (A) MALDI-TOF MS analysis of purified CC-Pent2. Monoisotopic [M+H] peaks were observed at 3367.1; calculated  $m/z$  is 3365.9. (B)



Analytical HPLC trace of purified CC-Pent2. Chromatograms were monitored at 280 (left) and 220 (right) nm wavelengths.

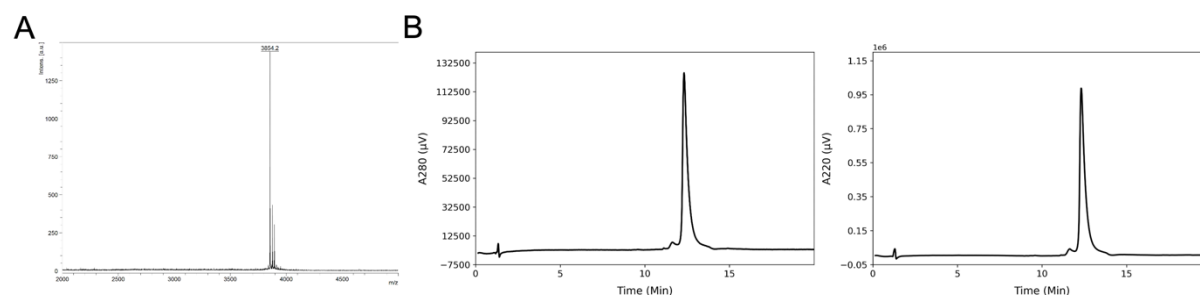

**Figure S25. FAM-CC-Pent2 MALDI and AHPLC data.** (A) MALDI-TOF MS analysis of purified FAM-CC-Pent2. Monoisotopic  $[M+H]^+$  peaks were observed at 3854.2; calculated  $m/z$  is 3855.0. (B) Analytical HPLC trace of purified FAM-CC-Pent2. Chromatograms were monitored at 280 (left) and 220 (right) nm wavelengths.

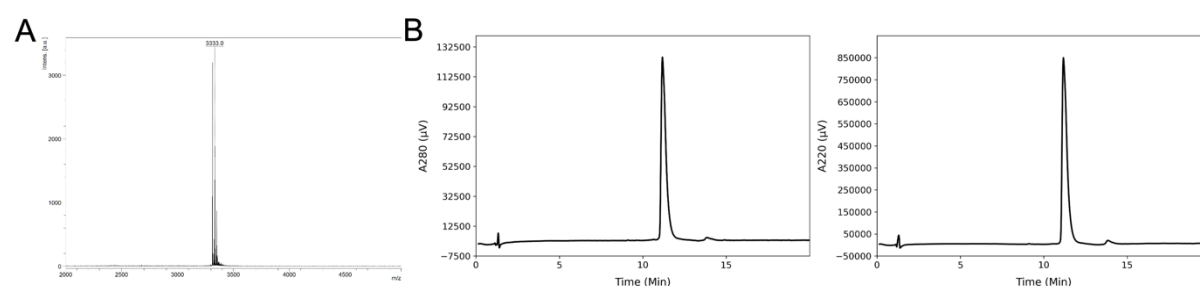

**Figure S26. CC-Hex2 MALDI and AHPLC data.** (A) MALDI-TOF MS analysis of purified CC-Hex2. Sodium adduct  $[M+Na]^+$  peaks were observed at 3333.0; calculated  $m/z$  is 3332.9. (B) Analytical HPLC trace of purified CC-Hex2. Chromatograms were monitored at 280 (left) and 220 (right) nm wavelengths.

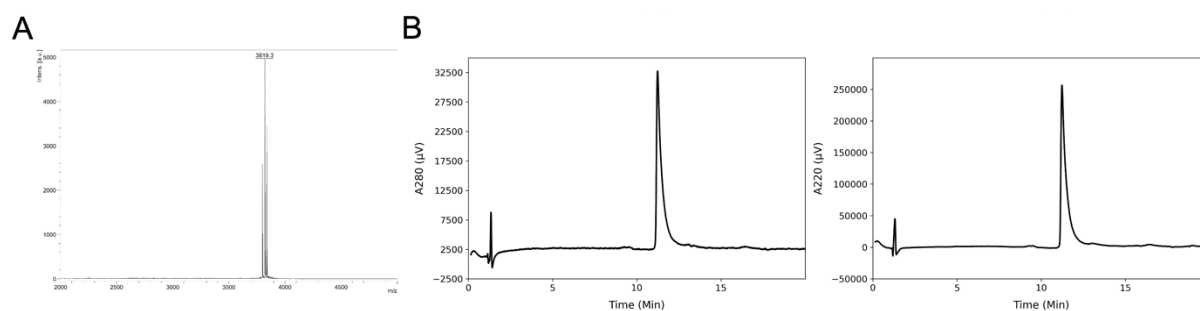

**Figure S27. FAM-CC-Hex2 MALDI and AHPLC data.** (A) MALDI-TOF MS analysis of purified CC-Hex2. Sodium adduct  $[M+Na]^+$  peaks were observed at 3819.3; calculated  $m/z$  is 3823.0. (B) Analytical HPLC trace of purified CC-Hex2. Chromatograms were monitored at 280 (left) and 220 (right) nm wavelengths.

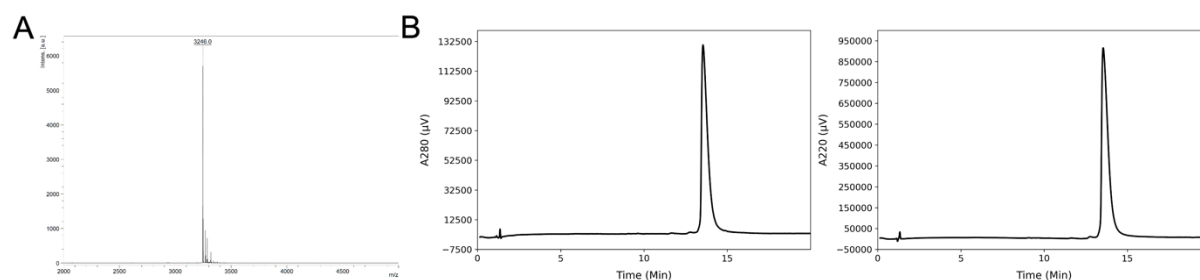

**Figure S28. CC-Hept MALDI and AHPLC data.** (A) MALDI-TOF MS analysis of purified CC-Hept. Monoisotopic  $[M+H]^+$  peaks were observed at 3246.0; calculated  $m/z$  is 3245.9. (B)

Analytical HPLC trace of purified CC-Hept. Chromatograms were monitored at 280 (left) and 220 (right) nm wavelengths.

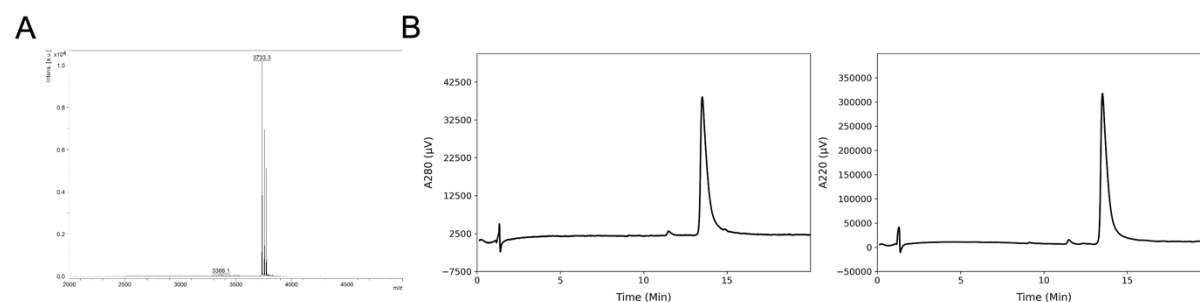

**Figure S29. FAM-CC-Hept MALDI and AHPLC data.** (A) MALDI-TOF MS analysis of purified FAM-CC-Hept. Monoisotopic  $[M+H]^+$  peaks were observed at 3733.3; calculated  $m/z$  is 3735.0. (B) Analytical HPLC trace of purified FAM-CC-Hept. Chromatograms were monitored at 280 (left) and 220 (right) nm wavelengths.

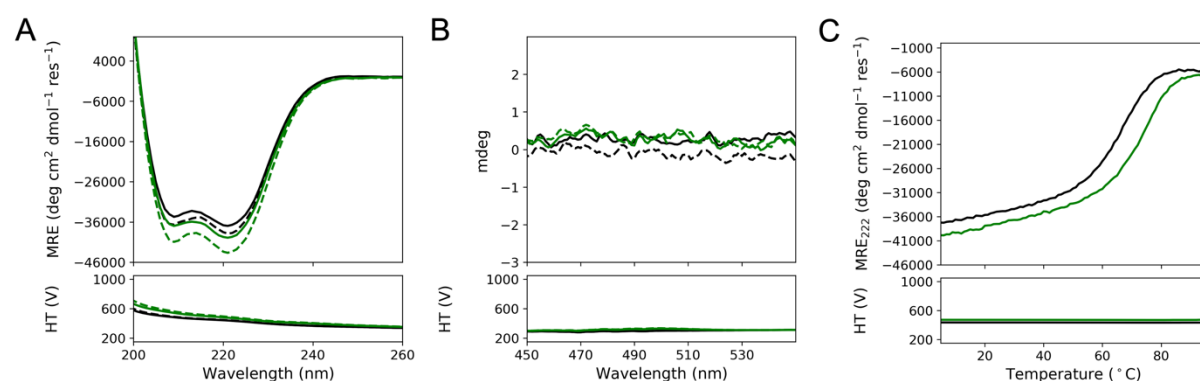

**Figure S30. CD Characterization of CC-Di and FAM-CC-Di.** CD spectra of 50  $\mu\text{M}$  CC-Di (black) and FAM-CC-Di (green) in PBS at 5  $^{\circ}\text{C}$  are shown in (A) and (B). Samples were analysed prior to melting (solid lines) and post-melting (dotted lines). (A) shows the spectra between 260-200 nm and (B) shows the spectra between 550-450 nm. (C) shows the thermal melt of the two peptides from 5-95  $^{\circ}\text{C}$ . There is not a noticeable difference in the CD characterization of the unlabelled and labelled variants of CC-Di.

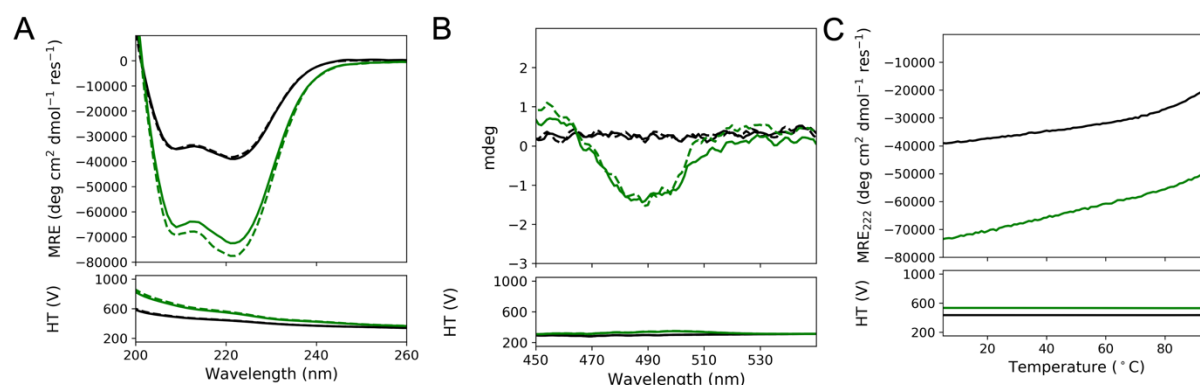

**Figure S31. CD Characterization of CC-Tri and FAM-CC-Tri.** CD spectra of 50  $\mu\text{M}$  CC-Tri (black) and FAM-CC-Tri (green) in PBS at 5  $^{\circ}\text{C}$  are shown in (A) and (B). Samples were analysed prior to melting (solid lines) and post-melting (dotted lines). (A) shows the spectra between 260-200 nm and (B) shows the spectra between 550-450 nm. (C) shows the thermal melt of the two peptides from 5-95  $^{\circ}\text{C}$ . The labelled peptide shows an increase in CD signal (A) as well as evidence of the Cotton effect (B). However, the thermal melts are consistent between the samples, indicative that the FAM-labelled peptide has the same thermodynamic properties as the unlabelled peptide.

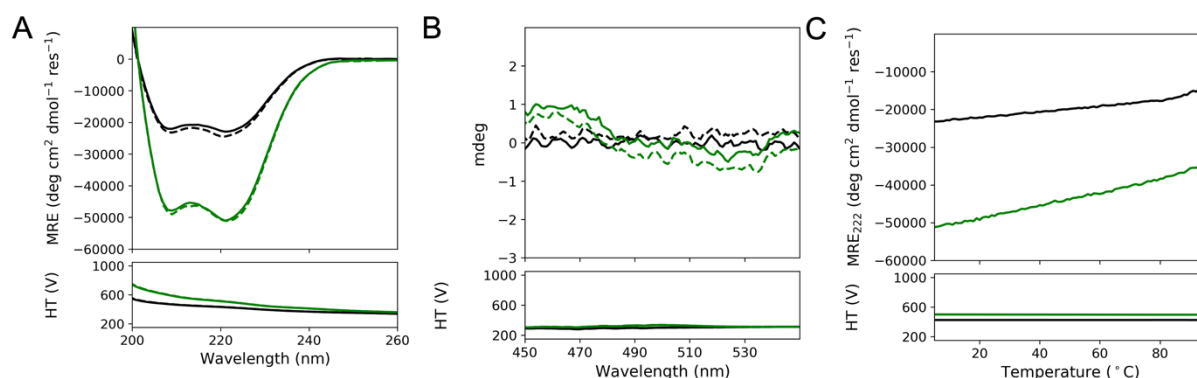

**Figure S32. CD Characterization of CC-Tet and FAM-CC-Tet.** CD spectra of 50  $\mu\text{M}$  CC-Tet (black) and FAM-CC-Tet (green) in PBS at 5 °C are shown in (A) and (B). Samples were analysed prior to melting (solid lines) and post-melting (dotted lines). (A) shows the spectra between 260-200 nm and (B) shows the spectra between 550-450 nm. (C) shows the thermal melt of the two peptides from 5-95 °C. The labelled peptide shows an increase in CD signal (A). However, the thermal melts are consistent between the samples, indicative that the FAM-labelled peptide has the same thermodynamic properties as the unlabelled peptide.

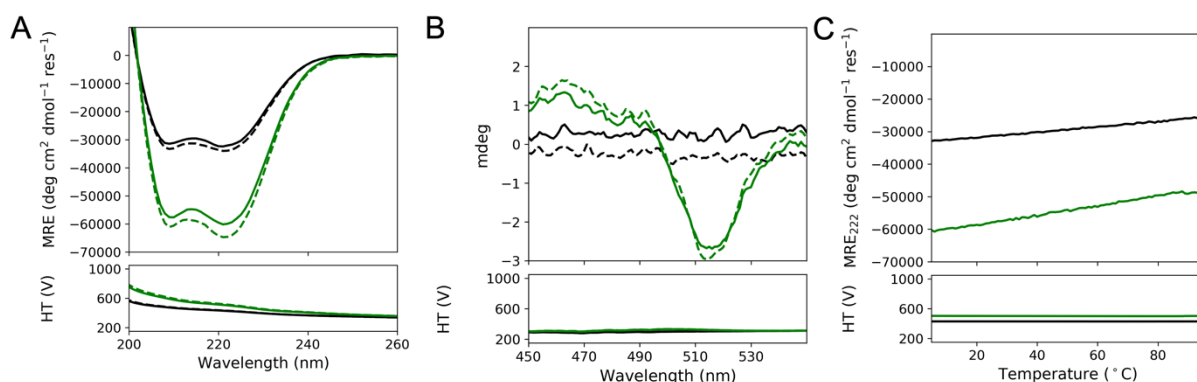

**Figure S33. CD Characterization of CC-Pent2 and FAM-CC-Pent2.** CD spectra of 50  $\mu\text{M}$  CC-Pent2 (black) and FAM-CC-Pent2 (green) in PBS at 5 °C are shown in (A) and (B). Samples were analysed prior to melting (solid lines) and post-melting (dotted lines). (A) shows the spectra between 260-200 nm and (B) shows the spectra between 550-450 nm. (C) shows the thermal melt of the two peptides from 5-95 °C. The labelled peptide shows an increase in CD signal (A) as well as evidence of Cotton effect (B). However, the thermal melts are consistent between the samples, indicative that the FAM-labelled peptide has the same thermodynamic properties as the unlabelled peptide.

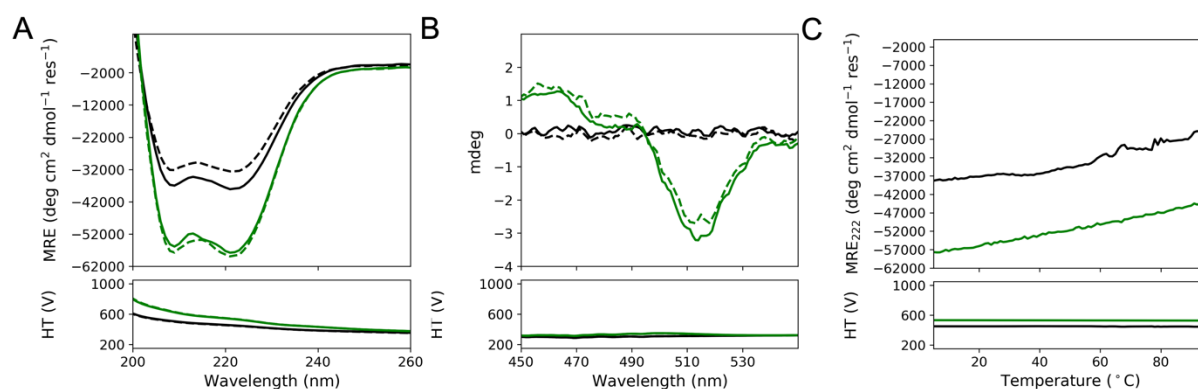

**Figure S34. CD Characterization of CC-Hex2 and FAM-CC-Hex2.** CD spectra of 50  $\mu\text{M}$  CC-Hex2 (black) and FAM-CC-Hex2 (green) in PBS at 5  $^{\circ}\text{C}$  are shown in (A) and (B). Samples were analysed prior to melting (solid lines) and post-melting (dotted lines). (A) shows the spectra between 260-200 nm and (B) shows the spectra between 550-450 nm. (C) shows the thermal melt of the two peptides from 5-95  $^{\circ}\text{C}$ . The labelled peptide shows an increase in CD signal (A) as well as evidence of Cotton effect (B). However, the thermal melts are consistent between the samples, indicative that the FAM-labelled peptide has the same thermodynamic properties as the unlabelled peptide.

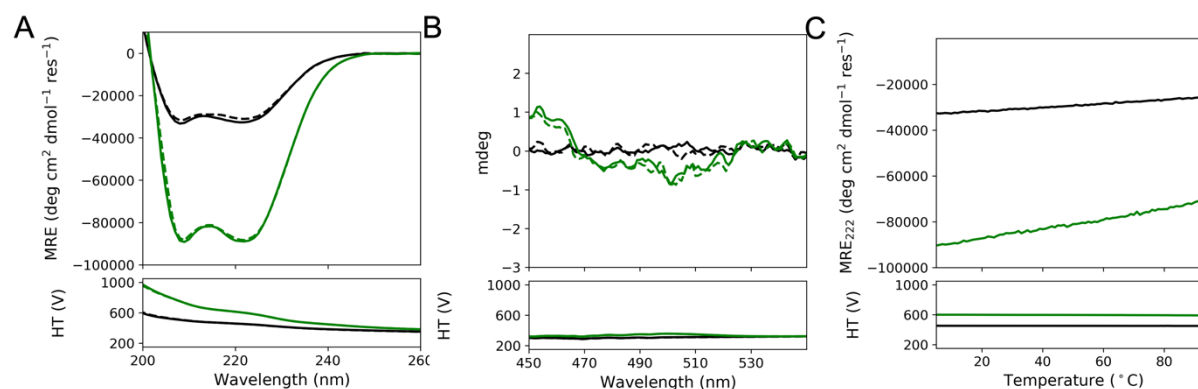

**Figure S35. CD Characterization of CC-Hept and FAM-CC-Hept.** CD spectra of 50  $\mu\text{M}$  CC-Hept (black) and FAM-CC-Hept (green) in PBS at 5  $^{\circ}\text{C}$  are shown in (A) and (B). Samples were analysed prior to melting (solid lines) and post-melting (dotted lines). (A) shows the spectra between 260-200 nm and (B) shows the spectra between 550-450 nm. (C) shows the thermal melt of the two peptides from 5-95  $^{\circ}\text{C}$ . The labelled peptide shows an increase in CD signal (A). However, the thermal melts are consistent between the samples, indicative that the FAM-labelled peptide has the same thermodynamic properties as the unlabelled peptide.

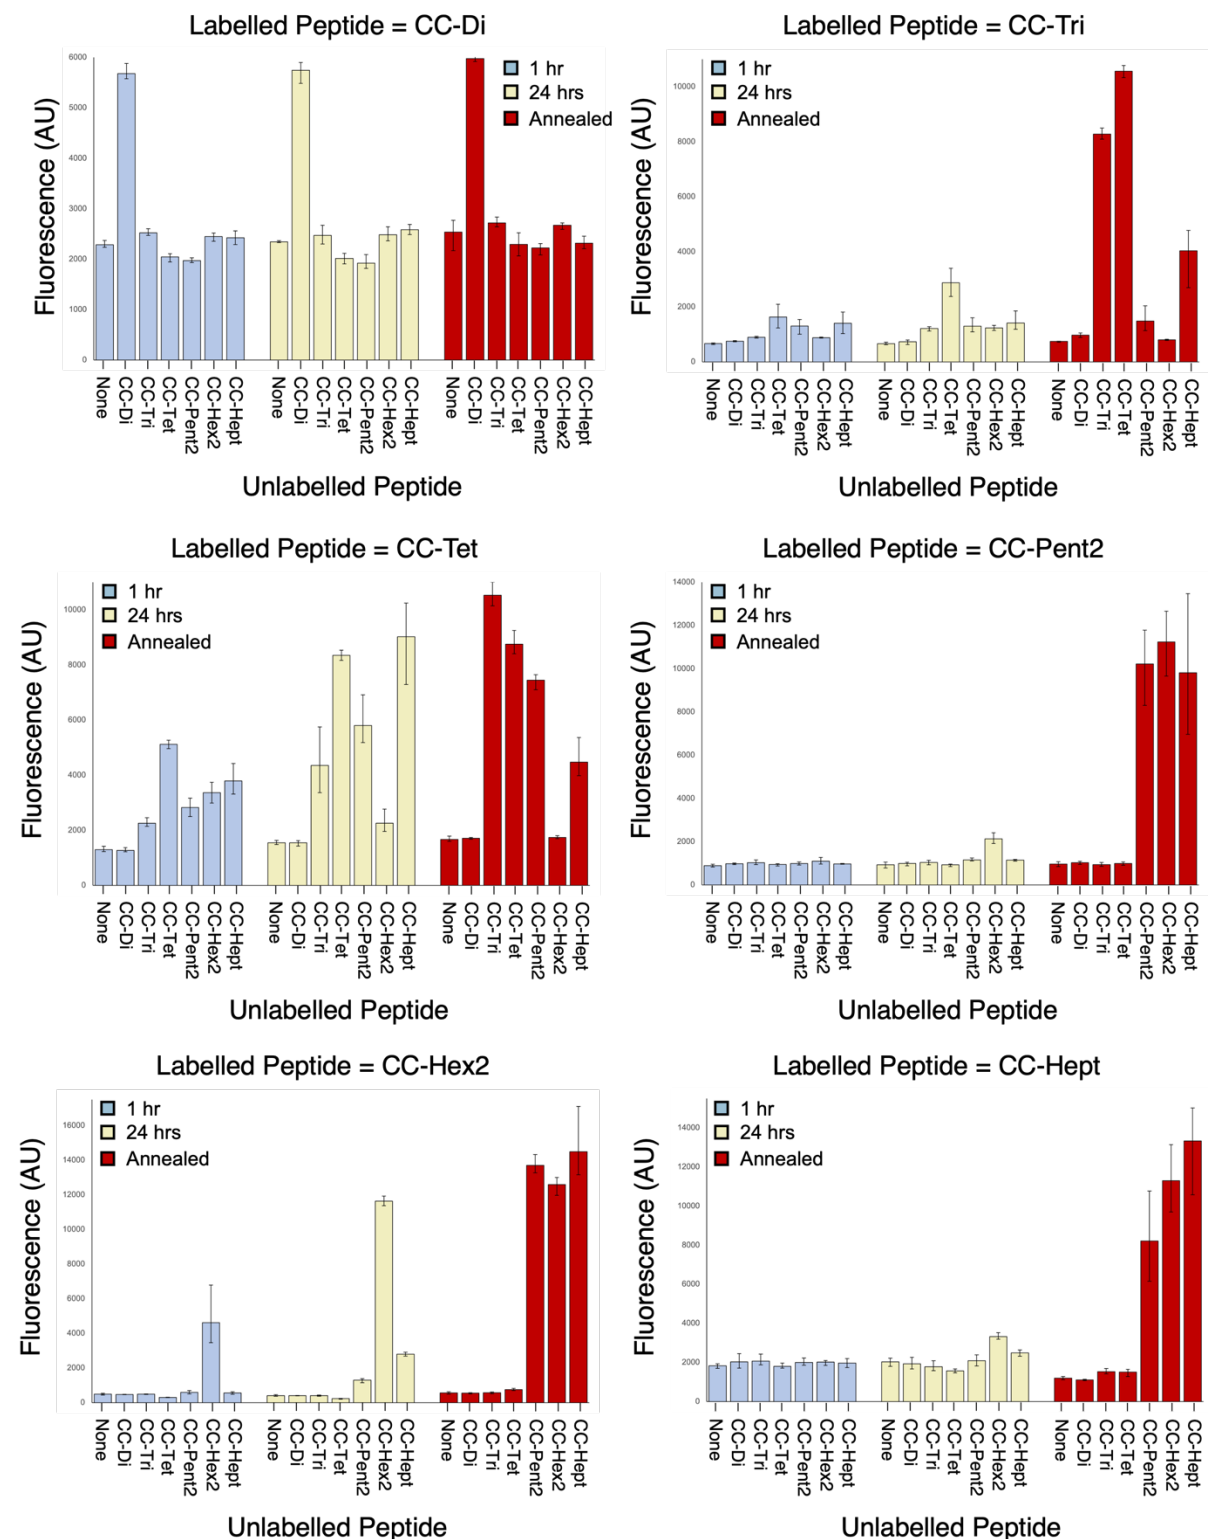

**Figure S36. Histogram representation of CC Basis Set fluorescence exchange data.** The raw fluorescence measurements of the Basis Set exchange studies are shown. The plotted fluorescence is the averaged value between three measurements. The top and bottom of the error bars are the maximum and minimum fluorescence values observed for each mixture respectively.

Table S6. Raw and Normalised CC Basis Set Fluorescence Data

| FAM-labelled Peptide | Unlabelled Peptide | 1 hr-raw |      |      | 1 hr-normalised |        |        | Avg    | Std Dev |
|----------------------|--------------------|----------|------|------|-----------------|--------|--------|--------|---------|
| FAM-CC-Di            | -                  | 2235     | 2372 | 2256 | -0.087          | -0.048 | -0.081 | -0.072 | 0.021   |
| FAM-CC-Di            | CC-Di              | 5577     | 5880 | 5582 | 0.884           | 0.972  | 0.885  | 0.914  | 0.050   |
| FAM-CC-Di            | CC-Tri             | 2470     | 2488 | 2603 | -0.087          | -0.048 | -0.081 | -0.072 | 0.021   |
| FAM-CC-Di            | CC-Tet             | 2106     | 2082 | 1944 | -0.060          | -0.069 | -0.122 | -0.084 | 0.033   |
| FAM-CC-Di            | CC-Pent2           | 2028     | 1959 | 1933 | -0.090          | -0.116 | -0.126 | -0.111 | 0.019   |
| FAM-CC-Di            | CC-Hex2            | 2354     | 2520 | 2471 | -0.053          | -0.005 | -0.019 | -0.025 | 0.025   |
| FAM-CC-Di            | CC-Hept            | 2420     | 2562 | 2289 | 0.060           | 0.114  | 0.010  | 0.061  | 0.052   |
| FAM-CC-Tri           | -                  | 631      | 685  | 671  | -0.015          | -0.007 | -0.009 | -0.010 | 0.004   |
| FAM-CC-Tri           | CC-Di              | 758      | 728  | 769  | 0.002           | -0.002 | 0.004  | 0.001  | 0.003   |
| FAM-CC-Tri           | CC-Tri             | 867      | 928  | 879  | 0.017           | 0.025  | 0.018  | 0.020  | 0.004   |
| FAM-CC-Tri           | CC-Tet             | 1231     | 1574 | 2094 | 0.027           | 0.068  | 0.131  | 0.075  | 0.052   |
| FAM-CC-Tri           | CC-Pent2           | 1008     | 1379 | 1536 | 0.000           | 0.045  | 0.064  | 0.036  | 0.033   |
| FAM-CC-Tri           | CC-Hex2            | 871      | 897  | 861  | 0.017           | 0.021  | 0.016  | 0.018  | 0.002   |
| FAM-CC-Tri           | CC-Hept            | 1031     | 1358 | 1812 | 0.003           | 0.042  | 0.097  | 0.047  | 0.047   |
| FAM-CC-Tet           | -                  | 1242     | 1229 | 1420 | -0.060          | -0.062 | -0.035 | -0.053 | 0.015   |
| FAM-CC-Tet           | CC-Di              | 1221     | 1220 | 1366 | -0.063          | -0.063 | -0.043 | -0.057 | 0.012   |
| FAM-CC-Tet           | CC-Tri             | 2456     | 2141 | 2173 | 0.111           | 0.067  | 0.071  | 0.083  | 0.024   |
| FAM-CC-Tet           | CC-Tet             | 5114     | 5269 | 4964 | 0.486           | 0.508  | 0.465  | 0.487  | 0.022   |
| FAM-CC-Tet           | CC-Pent2           | 3162     | 2818 | 2500 | 0.211           | 0.162  | 0.117  | 0.163  | 0.047   |
| FAM-CC-Tet           | CC-Hex2            | 3742     | 3367 | 2991 | 0.293           | 0.240  | 0.187  | 0.240  | 0.053   |
| FAM-CC-Tet           | CC-Hept            | 4420     | 3623 | 3316 | 0.388           | 0.276  | 0.233  | 0.299  | 0.080   |
| FAM-CC-Pent2         | -                  | 880      | 833  | 958  | -0.008          | -0.012 | 0.000  | -0.007 | 0.006   |
| FAM-CC-Pent2         | CC-Di              | 938      | 1014 | 992  | -0.002          | 0.006  | 0.004  | 0.003  | 0.004   |
| FAM-CC-Pent2         | CC-Tri             | 940      | 1150 | 997  | -0.002          | 0.019  | 0.004  | 0.007  | 0.011   |
| FAM-CC-Pent2         | CC-Tet             | 976      | 877  | 985  | 0.002           | -0.008 | 0.003  | -0.001 | 0.006   |
| FAM-CC-Pent2         | CC-Pent2           | 916      | 982  | 1067 | -0.004          | 0.003  | 0.011  | 0.003  | 0.008   |

|              |          |      |      |      |        |        |        |        |       |
|--------------|----------|------|------|------|--------|--------|--------|--------|-------|
| FAM-CC-Pent2 | CC-Hex2  | 966  | 1059 | 1269 | 0.001  | 0.010  | 0.031  | 0.014  | 0.016 |
| FAM-CC-Pent2 | CC-Hept  | 991  | 961  | 956  | 0.003  | 0.000  | 0.000  | 0.001  | 0.002 |
| FAM-CC-Hex2  | -        | 540  | 485  | 442  | -0.002 | -0.006 | -0.010 | -0.006 | 0.004 |
| FAM-CC-Hex2  | CC-Di    | 459  | 481  | 470  | -0.008 | -0.006 | -0.007 | -0.007 | 0.001 |
| FAM-CC-Hex2  | CC-Tri   | 503  | 492  | 477  | -0.005 | -0.006 | -0.007 | -0.006 | 0.001 |
| FAM-CC-Hex2  | CC-Tet   | 297  | 317  | 294  | -0.037 | -0.036 | -0.038 | -0.037 | 0.001 |
| FAM-CC-Hex2  | CC-Pent2 | 510  | 692  | 572  | -0.019 | -0.004 | -0.014 | -0.013 | 0.008 |
| FAM-CC-Hex2  | CC-Hex2  | 3468 | 6785 | 3593 | 0.242  | 0.518  | 0.252  | 0.337  | 0.156 |
| FAM-CC-Hex2  | CC-Hept  | 478  | 631  | 577  | -0.022 | -0.009 | -0.014 | -0.015 | 0.007 |
| FAM-CC-Hept  | -        | 1705 | 1859 | 1931 | 0.041  | 0.054  | 0.060  | 0.052  | 0.010 |
| FAM-CC-Hept  | CC-Di    | 2452 | 1929 | 1710 | 0.103  | 0.060  | 0.042  | 0.068  | 0.031 |
| FAM-CC-Hept  | CC-Tri   | 2426 | 1895 | 1878 | 0.101  | 0.057  | 0.056  | 0.071  | 0.026 |
| FAM-CC-Hept  | CC-Tet   | 1969 | 1721 | 1706 | 0.063  | 0.043  | 0.042  | 0.049  | 0.012 |
| FAM-CC-Hept  | CC-Pent2 | 1891 | 2231 | 1864 | 0.057  | 0.085  | 0.055  | 0.065  | 0.017 |
| FAM-CC-Hept  | CC-Hex2  | 2103 | 2099 | 1855 | 0.074  | 0.074  | 0.054  | 0.067  | 0.012 |
| FAM-CC-Hept  | CC-Hept  | 2201 | 1963 | 1739 | 0.082  | 0.063  | 0.044  | 0.063  | 0.019 |

| <b>FAM-labelled Peptide</b> | <b>Unlabelled Peptide</b> | <b>24 hr-raw</b> |      |      | <b>24 hr-normalised</b> |        |        | <b>Avg</b> | <b>Std Dev</b> |
|-----------------------------|---------------------------|------------------|------|------|-------------------------|--------|--------|------------|----------------|
| FAM-CC-Di                   | -                         | 2366             | 2328 | 2333 | -0.049                  | -0.060 | -0.059 | -0.056     | 0.006          |
| FAM-CC-Di                   | CC-Di                     | 5900             | 5485 | 5847 | 0.978                   | 0.857  | 0.962  | 0.932      | 0.066          |
| FAM-CC-Di                   | CC-Tri                    | 2445             | 2300 | 2675 | -0.026                  | -0.069 | 0.040  | -0.018     | 0.055          |
| FAM-CC-Di                   | CC-Tet                    | 2116             | 1907 | 2022 | -0.056                  | -0.136 | -0.092 | -0.095     | 0.040          |
| FAM-CC-Di                   | CC-Pent2                  | 2093             | 1818 | 1859 | -0.065                  | -0.170 | -0.155 | -0.130     | 0.057          |
| FAM-CC-Di                   | CC-Hex2                   | 2441             | 2363 | 2644 | -0.028                  | -0.050 | 0.031  | -0.015     | 0.042          |
| FAM-CC-Di                   | CC-Hept                   | 2687             | 2488 | 2574 | 0.162                   | 0.086  | 0.119  | 0.122      | 0.038          |
| FAM-CC-Tri                  | -                         | 646              | 620  | 712  | -0.013                  | -0.016 | -0.004 | -0.011     | 0.006          |
| FAM-CC-Tri                  | CC-Di                     | 767              | 629  | 794  | 0.003                   | -0.015 | 0.007  | -0.001     | 0.012          |
| FAM-CC-Tri                  | CC-Tri                    | 1279             | 1118 | 1233 | 0.071                   | 0.050  | 0.065  | 0.062      | 0.011          |

|              |          |       |       |       |        |        |        |        |       |
|--------------|----------|-------|-------|-------|--------|--------|--------|--------|-------|
| FAM-CC-Tri   | CC-Tet   | 2849  | 3399  | 2378  | 0.222  | 0.288  | 0.165  | 0.225  | 0.062 |
| FAM-CC-Tri   | CC-Pent2 | 1194  | 1606  | 1095  | 0.022  | 0.072  | 0.010  | 0.035  | 0.033 |
| FAM-CC-Tri   | CC-Hex2  | 1232  | 1144  | 1329  | 0.065  | 0.054  | 0.078  | 0.066  | 0.012 |
| FAM-CC-Tri   | CC-Hept  | 1201  | 1852  | 1187  | 0.023  | 0.102  | 0.021  | 0.049  | 0.046 |
| FAM-CC-Tet   | -        | 1535  | 1483  | 1630  | -0.019 | -0.026 | -0.006 | -0.017 | 0.011 |
| FAM-CC-Tet   | CC-Di    | 1627  | 1425  | 1579  | -0.006 | -0.035 | -0.013 | -0.018 | 0.015 |
| FAM-CC-Tet   | CC-Tri   | 5748  | 3365  | 3939  | 0.576  | 0.239  | 0.320  | 0.379  | 0.176 |
| FAM-CC-Tet   | CC-Tet   | 8363  | 8161  | 8530  | 0.945  | 0.917  | 0.969  | 0.944  | 0.026 |
| FAM-CC-Tet   | CC-Pent2 | 6915  | 5299  | 5179  | 0.741  | 0.513  | 0.496  | 0.583  | 0.137 |
| FAM-CC-Tet   | CC-Hex2  | 2768  | 1957  | 2052  | 0.155  | 0.041  | 0.054  | 0.083  | 0.063 |
| FAM-CC-Tet   | CC-Hept  | 10242 | 7291  | 9528  | 1.210  | 0.794  | 1.110  | 1.038  | 0.217 |
| FAM-CC-Pent2 | -        | 939   | 782   | 1058  | -0.002 | -0.018 | 0.000  | -0.006 | 0.010 |
| FAM-CC-Pent2 | CC-Di    | 886   | 1042  | 1044  | -0.007 | 0.009  | 0.004  | 0.002  | 0.008 |
| FAM-CC-Pent2 | CC-Tri   | 931   | 1137  | 1040  | -0.003 | 0.018  | 0.004  | 0.007  | 0.011 |
| FAM-CC-Pent2 | CC-Tet   | 958   | 847   | 968   | 0.000  | -0.011 | 0.003  | -0.003 | 0.007 |
| FAM-CC-Pent2 | CC-Pent2 | 1116  | 1113  | 1248  | 0.016  | 0.016  | 0.029  | 0.020  | 0.008 |
| FAM-CC-Pent2 | CC-Hex2  | 2082  | 1912  | 2409  | 0.113  | 0.096  | 0.146  | 0.119  | 0.025 |
| FAM-CC-Pent2 | CC-Hept  | 1185  | 1099  | 1157  | 0.023  | 0.014  | 0.020  | 0.019  | 0.004 |
| FAM-CC-Hex2  | -        | 460   | 391   | 373   | -0.008 | -0.014 | -0.015 | -0.013 | 0.004 |
| FAM-CC-Hex2  | CC-Di    | 416   | 396   | 415   | -0.012 | -0.014 | -0.012 | -0.012 | 0.001 |
| FAM-CC-Hex2  | CC-Tri   | 441   | 372   | 397   | -0.010 | -0.016 | -0.013 | -0.013 | 0.003 |
| FAM-CC-Hex2  | CC-Tet   | 197   | 239   | 251   | -0.046 | -0.042 | -0.038 | -0.042 | 0.004 |
| FAM-CC-Hex2  | CC-Pent2 | 1381  | 1371  | 1148  | 0.054  | 0.053  | 0.034  | 0.047  | 0.011 |
| FAM-CC-Hex2  | CC-Hex2  | 11610 | 11929 | 11367 | 0.919  | 0.945  | 0.899  | 0.921  | 0.023 |
| FAM-CC-Hex2  | CC-Hept  | 2681  | 2910  | 2798  | 0.164  | 0.183  | 0.174  | 0.174  | 0.010 |
| FAM-CC-Hept  | -        | 2225  | 1805  | 2066  | 0.084  | 0.050  | 0.071  | 0.068  | 0.017 |
| FAM-CC-Hept  | CC-Di    | 2264  | 1855  | 1671  | 0.088  | 0.054  | 0.039  | 0.060  | 0.025 |
| FAM-CC-Hept  | CC-Tri   | 2095  | 1656  | 1585  | 0.074  | 0.037  | 0.032  | 0.048  | 0.023 |
| FAM-CC-Hept  | CC-Tet   | 1675  | 1571  | 1474  | 0.039  | 0.030  | 0.022  | 0.031  | 0.008 |



|             |          |      |      |      |       |       |       |       |       |
|-------------|----------|------|------|------|-------|-------|-------|-------|-------|
| FAM-CC-Hept | CC-Pent2 | 1820 | 2386 | 2075 | 0.051 | 0.098 | 0.072 | 0.074 | 0.023 |
| FAM-CC-Hept | CC-Hex2  | 3257 | 3517 | 3190 | 0.169 | 0.191 | 0.164 | 0.175 | 0.014 |
| FAM-CC-Hept | CC-Hept  | 2521 | 2637 | 2324 | 0.109 | 0.118 | 0.093 | 0.107 | 0.013 |

| <b>FAM-labelled Peptide</b> | <b>Unlabelled Peptide</b> | <b>annealed-raw</b> |       |       | <b>annealed-normalised</b> |        |        | <b>Avg</b> | <b>Std Dev</b> |
|-----------------------------|---------------------------|---------------------|-------|-------|----------------------------|--------|--------|------------|----------------|
| FAM-CC-Di                   | -                         | 2170                | 2669  | 2769  | -0.106                     | 0.039  | 0.068  | 0.000      | 0.093          |
| FAM-CC-Di                   | CC-Di                     | 5943                | 6068  | 5920  | 0.990                      | 1.026  | 0.983  | 1.000      | 0.023          |
| FAM-CC-Di                   | CC-Tri                    | 2837                | 2642  | 2676  | 0.087                      | 0.031  | 0.041  | 0.053      | 0.030          |
| FAM-CC-Di                   | CC-Tet                    | 2297                | 2524  | 2064  | 0.013                      | 0.100  | -0.076 | 0.012      | 0.088          |
| FAM-CC-Di                   | CC-Pent2                  | 2272                | 2311  | 2084  | 0.003                      | 0.018  | -0.069 | -0.016     | 0.046          |
| FAM-CC-Di                   | CC-Hex2                   | 2720                | 2703  | 2593  | 0.053                      | 0.049  | 0.017  | 0.040      | 0.020          |
| FAM-CC-Di                   | CC-Hept                   | 2287                | 2455  | 2208  | 0.009                      | 0.073  | -0.021 | 0.020      | 0.048          |
| FAM-CC-Tri                  | -                         | 751                 | 717   | 754   | 0.001                      | -0.003 | 0.002  | 0.000      | 0.003          |
| FAM-CC-Tri                  | CC-Di                     | 1046                | 888   | 975   | 0.041                      | 0.020  | 0.031  | 0.030      | 0.010          |
| FAM-CC-Tri                  | CC-Tri                    | 8243                | 8496  | 8093  | 0.995                      | 1.029  | 0.976  | 1.000      | 0.027          |
| FAM-CC-Tri                  | CC-Tet                    | 10332               | 10578 | 10772 | 1.125                      | 1.155  | 1.178  | 1.153      | 0.027          |
| FAM-CC-Tri                  | CC-Pent2                  | 1133                | 1286  | 2033  | 0.015                      | 0.033  | 0.124  | 0.057      | 0.058          |
| FAM-CC-Tri                  | CC-Hex2                   | 781                 | 794   | 822   | 0.005                      | 0.007  | 0.011  | 0.008      | 0.003          |
| FAM-CC-Tri                  | CC-Hept                   | 2700                | 4778  | 4634  | 0.204                      | 0.455  | 0.438  | 0.366      | 0.140          |
| FAM-CC-Tet                  | -                         | 1599                | 1618  | 1791  | -0.010                     | -0.007 | 0.017  | 0.000      | 0.015          |
| FAM-CC-Tet                  | CC-Di                     | 1723                | 1671  | 1740  | 0.008                      | 0.000  | 0.010  | 0.006      | 0.005          |
| FAM-CC-Tet                  | CC-Tri                    | 11003               | 10434 | 10148 | 1.318                      | 1.238  | 1.197  | 1.251      | 0.061          |
| FAM-CC-Tet                  | CC-Tet                    | 8405                | 9248  | 8601  | 0.951                      | 1.070  | 0.979  | 1.000      | 0.062          |
| FAM-CC-Tet                  | CC-Pent2                  | 7101                | 7645  | 7586  | 0.767                      | 0.844  | 0.835  | 0.815      | 0.042          |
| FAM-CC-Tet                  | CC-Hex2                   | 1708                | 1697  | 1800  | 0.005                      | 0.004  | 0.018  | 0.009      | 0.008          |
| FAM-CC-Tet                  | CC-Hept                   | 5367                | 4066  | 3985  | 0.522                      | 0.338  | 0.327  | 0.396      | 0.110          |
| FAM-CC-Pent2                | -                         | 972                 | 821   | 1076  | 0.002                      | -0.014 | 0.012  | 0.000      | 0.013          |
| FAM-CC-Pent2                | CC-Di                     | 947                 | 1045  | 1093  | -0.001                     | 0.009  | 0.014  | 0.007      | 0.007          |

|              |          |       |       |       |        |        |        |        |       |
|--------------|----------|-------|-------|-------|--------|--------|--------|--------|-------|
| FAM-CC-Pent2 | CC-Tri   | 915   | 1039  | 852   | -0.004 | 0.008  | -0.010 | -0.002 | 0.010 |
| FAM-CC-Pent2 | CC-Tet   | 1000  | 913   | 1063  | 0.004  | -0.004 | 0.011  | 0.004  | 0.008 |
| FAM-CC-Pent2 | CC-Pent2 | 11785 | 10334 | 10570 | 1.089  | 0.943  | 0.967  | 1.000  | 0.078 |
| FAM-CC-Pent2 | CC-Hex2  | 12662 | 9654  | 11397 | 1.178  | 0.875  | 1.050  | 1.034  | 0.152 |
| FAM-CC-Pent2 | CC-Hept  | 13474 | 10814 | 8992  | 1.259  | 0.992  | 0.808  | 1.020  | 0.227 |
| FAM-CC-Hex2  | -        | 632   | 499   | 546   | 0.006  | -0.005 | -0.001 | 0.000  | 0.006 |
| FAM-CC-Hex2  | CC-Di    | 567   | 508   | 572   | 0.001  | -0.004 | 0.001  | -0.001 | 0.003 |
| FAM-CC-Hex2  | CC-Tri   | 615   | 519   | 592   | 0.005  | -0.003 | 0.003  | 0.001  | 0.004 |
| FAM-CC-Hex2  | CC-Tet   | 698   | 822   | 759   | -0.004 | 0.007  | 0.002  | 0.002  | 0.005 |
| FAM-CC-Hex2  | CC-Pent2 | 14317 | 13273 | 13498 | 1.148  | 1.059  | 1.078  | 1.095  | 0.046 |
| FAM-CC-Hex2  | CC-Hex2  | 13004 | 11976 | 12783 | 1.035  | 0.949  | 1.016  | 1.000  | 0.045 |
| FAM-CC-Hex2  | CC-Hept  | 17102 | 13215 | 13161 | 1.383  | 1.055  | 1.050  | 1.163  | 0.191 |
| FAM-CC-Hept  | -        | 2225  | 1805  | 2066  | 0.006  | -0.007 | 0.001  | 0.000  | 0.007 |
| FAM-CC-Hept  | CC-Di    | 2264  | 1855  | 1671  | -0.005 | -0.007 | -0.011 | -0.008 | 0.003 |
| FAM-CC-Hept  | CC-Tri   | 2095  | 1656  | 1585  | 0.018  | 0.024  | 0.040  | 0.027  | 0.011 |
| FAM-CC-Hept  | CC-Tet   | 1675  | 1571  | 1474  | 0.006  | 0.034  | 0.037  | 0.026  | 0.017 |
| FAM-CC-Hept  | CC-Pent2 | 1820  | 2386  | 2075  | 0.789  | 0.408  | 0.537  | 0.578  | 0.194 |
| FAM-CC-Hept  | CC-Hex2  | 3257  | 3517  | 3190  | 0.984  | 0.701  | 0.812  | 0.832  | 0.143 |
| FAM-CC-Hept  | CC-Hept  | 2521  | 2637  | 2324  | 1.088  | 0.773  | 1.139  | 1.000  | 0.198 |

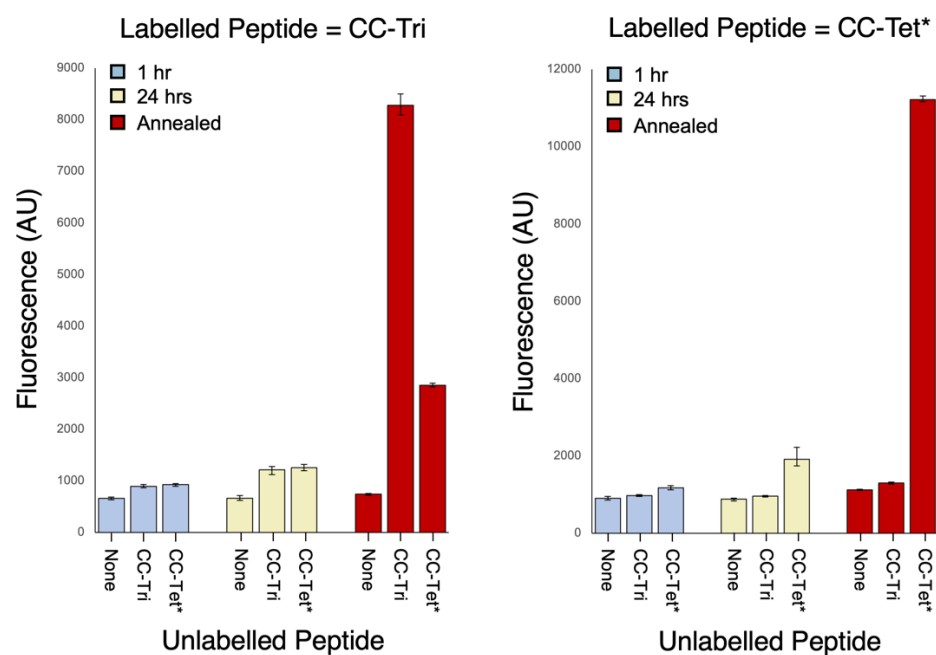

**Figure S37.** Histogram representation of CC-Tri and CC-Tet\* fluorescence exchange data. The raw fluorescence measurements of the CC-Tri and CC-Tet\* exchange studies are shown. The plotted fluorescence is the averaged value between three measurements. The top and bottom of the error bars are the maximum and minimum fluorescence values observed for each mixture respectively.

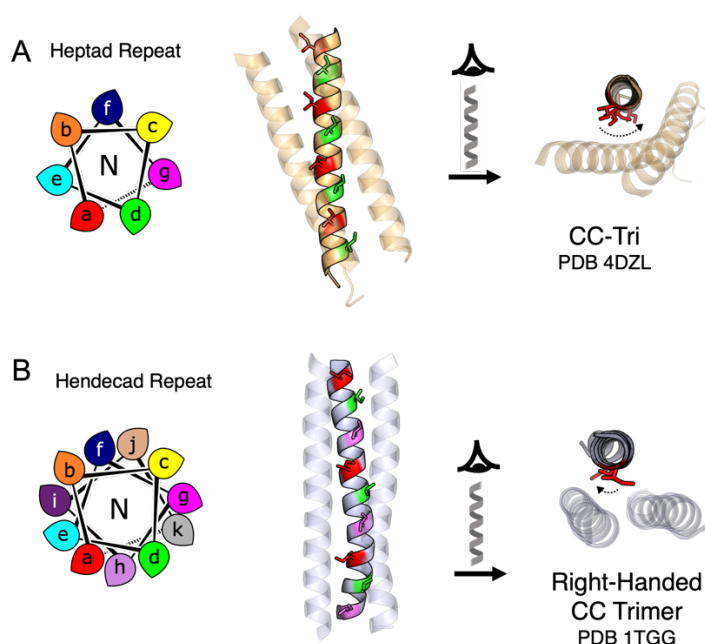

**Figure S38.** A comparison of the canonical CC heptad repeat and noncanonical hendecad repeat. A) Helical wheel representation of a heptad repeat where positions **a** and **d** (red and green, respectively) contribute to the coiled-coil interface. This is illustrated by CC-Tri,<sup>1</sup> which forms a left-handed coiled coil. (B) A similar helical wheel for a hendecad repeat where positions **a**, **d** and **h** (coloured red, green, and lilac, respectively) define the coiled-coil interface. This is illustrated by the PDB entry 1tgg, which forms a straightened coiled-coil trimer.<sup>21</sup>

Table S7. Orthogonal Set Sequences

| <b>g-Register CC</b> | <i>gabcdef gabcdef gabcdef gabcdef</i>              | <b>Monoisotopic Mass</b> |
|----------------------|-----------------------------------------------------|--------------------------|
| CC-Di                | Ac-G EIAALKQ EIAALKK ENAALKW EIAALKQ G-CONH2        | 3246.9                   |
| FAM-CC-Di            | FAM-GGG EIAALKQ EIAALKK ENAALKW EIAALKQ G-CONH2     | 3737.0                   |
| CC-Tri               | Ac-G EIAAIKQ EIAAIKK EIAAIKW EIAAIKQ G-CONH2        | 3245.9                   |
| FAM-CC Tri           | FAM-GGG EIAAIKQ EIAAIKK EIAAIKW EIAAIKQ G-CONH2     | 3735.0                   |
| <b>c-Register CC</b> | <b><i>cdefgab cdefgab cdefgab cdefgab</i></b>       |                          |
| CC-Tet*              | Ac-G EIQQQLK EIQQQLK EIQQQLK EIQQQLK G-CONH2        | 3703.1                   |
| FAM-CC-Tet*          | FAM-GGG EIQQQLK EIQQQLK EIQQQLK EIQQQLK G-CONH2     | 4192.3                   |
| CC-Hex2              | Ac-G EIAQSLK EIAKSLK EIAWSLK EIAQSLK G-CONH2        | 3309.9                   |
| FAM-CC-Hex2          | FAM-GGG EIAQSLK EIAKSLK EIAWSLK EIAQSLK G-CONH2     | 3800.0                   |
|                      | <b><i>cdefgab cdefgab cdefghijkab cdefgab</i></b>   |                          |
| CC-Pent2-hen3        | Ac-G EIAQALK EIAKALK EIAWALAAALK EIAQALK G-CONH2    | 3692.1                   |
| FAM-CC-Pent2-hen3    | FAM-GGG EIAQALK EIAKALK EIAWALAAALK EIAQALK G-CONH2 | 4182.3                   |
|                      | <b><i>cdefgab cdefghijkab cdefgab cdefgab</i></b>   |                          |
| CC-Hept-IV-hen2      | Ac-G EVAQAIK EVAKAVAAAIK EVAWAIK EVAQAIK G-CONH2    | 3502.0                   |
| FAM-CC-Hept-IV-hen2  | FAM-GGG EVAQAIK EVAKAVAAAIK EVAWAIK EVAQAIK G-CONH2 | 3992.1                   |

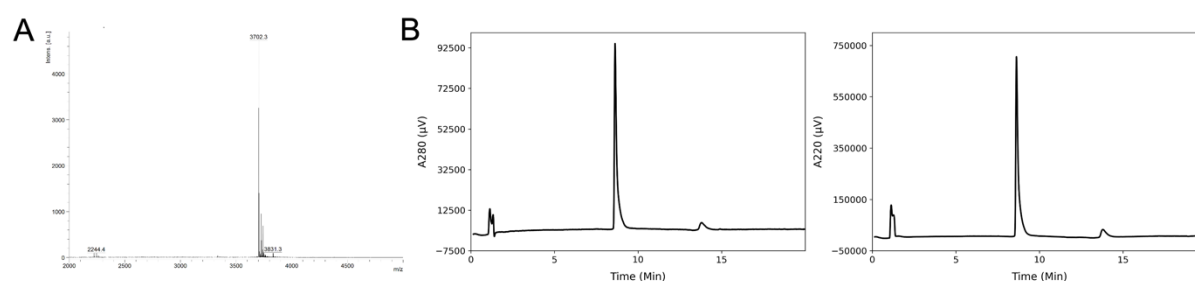

**Figure S39. MALDI and AHPLC of CC-Tet\*.** (A) MALDI-TOF MS analysis of purified CC-Tet\*. Monoisotopic [M+H] peaks were observed at 3702.3; calculated m/z is 3703.1. (B) Analytical HPLC trace of purified CC-Tet\*. Chromatograms were monitored at 280 (left) and 220 (right) nm wavelengths.

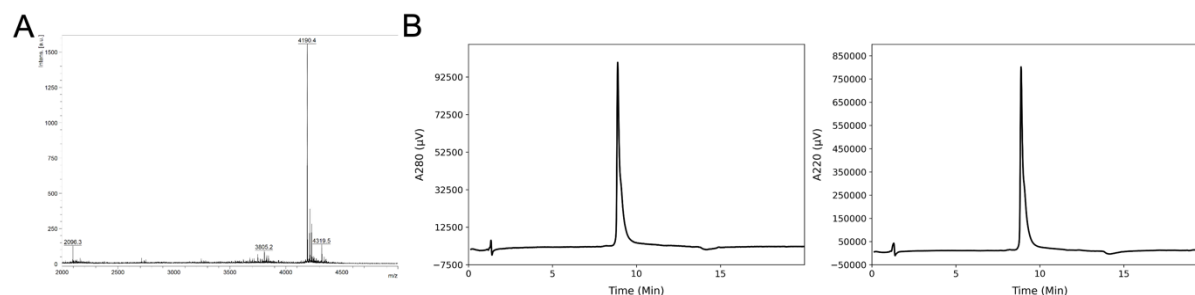

**Figure S40. MALDI and AHPLC of FAM-CC-Tet\*.** (A) MALDI-TOF MS analysis of purified FAM-CC-Tet\*. Monoisotopic [M+H] peaks were observed at 4190.4; calculated m/z is 4192.3. (B) Analytical HPLC trace of purified FAM-CC-Tet\*. Chromatograms were monitored at 280 (left) and 220 (right) nm wavelengths.

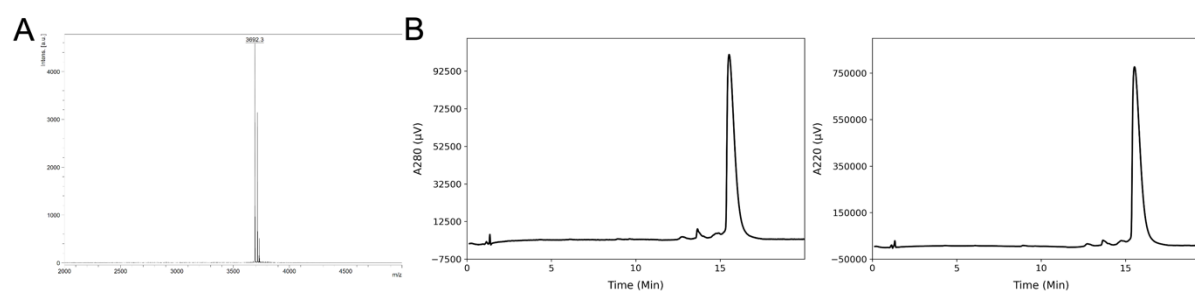

**Figure S41. MALDI and AHPLC of CC-Pent2-hen3.** (A) MALDI-TOF MS analysis of purified CC-Pent2-hen3. Monoisotopic [M+H] peaks were observed at 3692.3; calculated m/z is

3692.1. (B) Analytical HPLC trace of purified CC-Pent2-hen3. Chromatograms were monitored at 280 (left) and 220 (right) nm wavelengths.

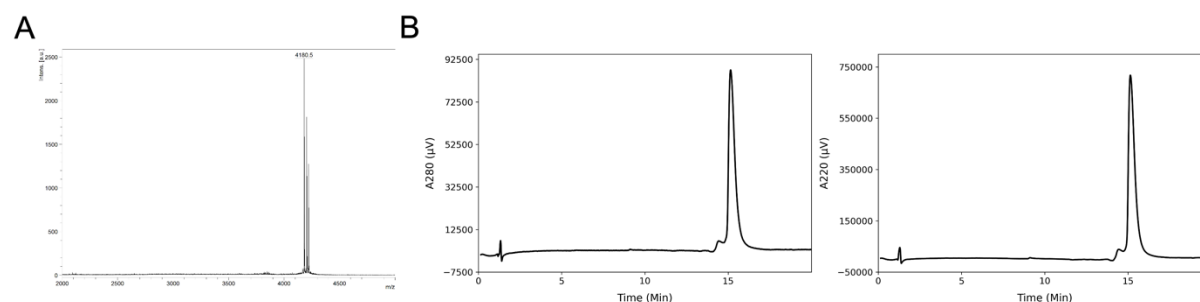

**Figure S42. MALDI and AHPLC of FAM-CC-Pent2-hen3.** (A) MALDI-TOF MS analysis of purified FAM-CC-Pent2-hen3. Monoisotopic  $[M+H]$  peaks were observed at 4180.5; calculated  $m/z$  is 4182.3. (B) Analytical HPLC trace of purified FAM-CC-Pent2-hen3. Chromatograms were monitored at 280 (left) and 220 (right) nm wavelengths.

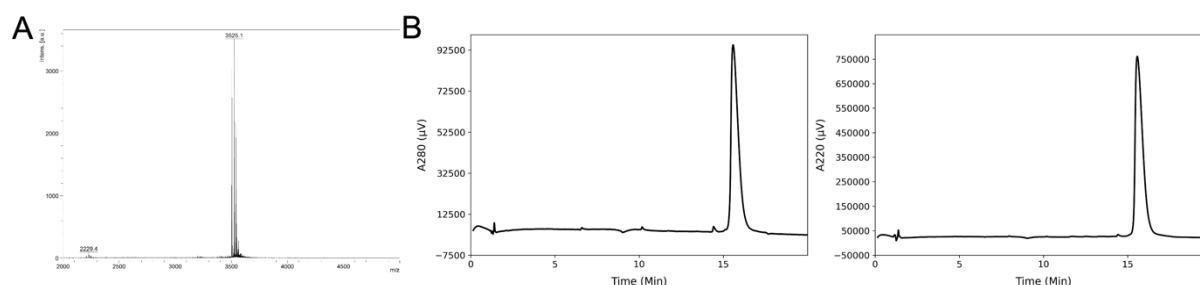

**Figure S43. MALDI and AHPLC of CC-Hept-IV-hen2.** (A) MALDI-TOF MS analysis of purified CC-Hept-IV-hen2. Sodium adduct  $[M+Na]$  peaks were observed at 3525.1; calculated  $m/z$  is 3525.0. (B) Analytical HPLC trace of purified CC-Hept-IV-hen2. Chromatograms were monitored at 280 (left) and 220 (right) nm wavelengths.

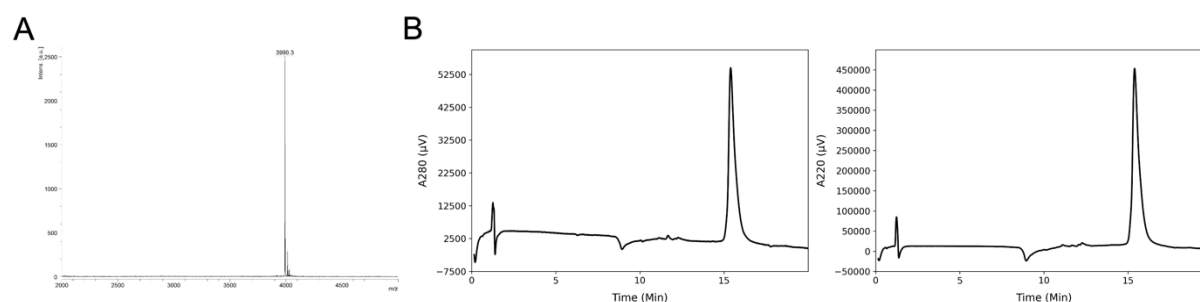

**Figure S44. MALDI and AHPLC of FAM-CC-Hept-IV-hen2.** (A) MALDI-TOF MS analysis of purified CC-Hept-IV-hen2. Sodium adduct  $[M+Na]$  peaks were observed at 3990.3; calculated  $m/z$  is 3992.1. (B) Analytical HPLC trace of purified CC-Hept-IV-hen2. Chromatograms were monitored at 280 (left) and 220 (right) nm wavelengths.

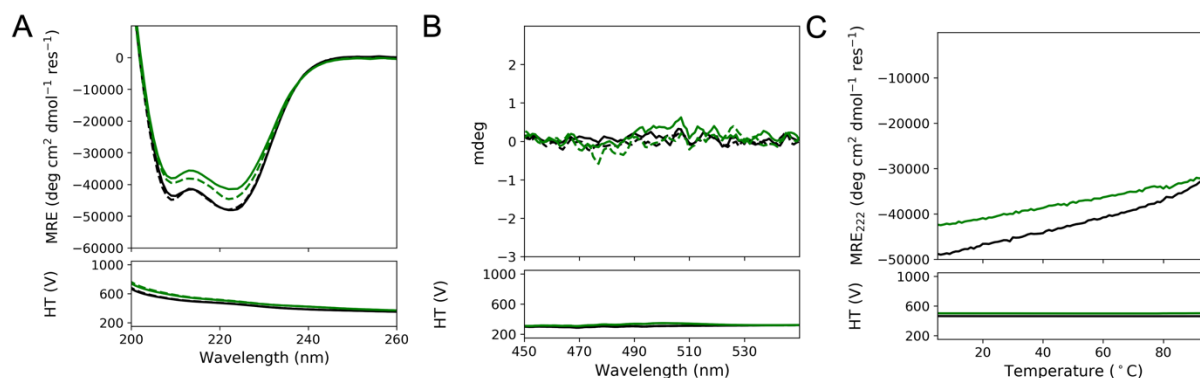

**Figure S45. CD Characterization of CC-Tet\* and FAM-CC-Tet\*.** CD spectra of 50  $\mu$ M CC-Tet\* (black) and FAM-CC-Tet\* (green) in PBS at 5 °C are shown in (A) and (B). Samples were analysed prior to melting (solid lines) and post-melting (dotted lines). (A) shows the spectra between 260-200 nm and (B) shows the spectra between 550-450 nm. (C) shows the thermal melt of the two peptides from 5-95 °C. There is not a noticeable difference in the CD characterization of the unlabelled and labelled variants of CC-Tet\*.

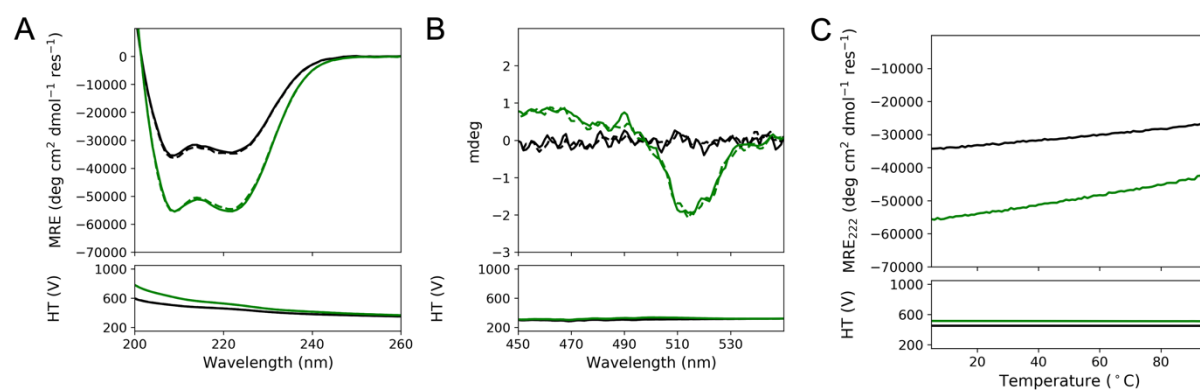

**Figure S46. CD Characterization of CC-Pent2-hen3 and FAM-CC-Pent2-hen3.** CD spectra of 50  $\mu$ M CC-Pent2-hen3 (black) and FAM-CC-Pent2-hen3 (green) in PBS at 5 °C are shown in (A) and (B). Samples were analysed prior to melting (solid lines) and post-melting (dotted lines). (A) shows the spectra between 260-200 nm and (B) shows the spectra between 550-450 nm. (C) shows the thermal melt of the two peptides from 5-95 °C. The labelled peptide shows an increase in CD signal (A) as well as evidence of the Cotton effect (B). However, the thermal melts are consistent between the samples, indicative that the FAM-labelled peptide has the same thermodynamic properties as the unlabelled peptide.

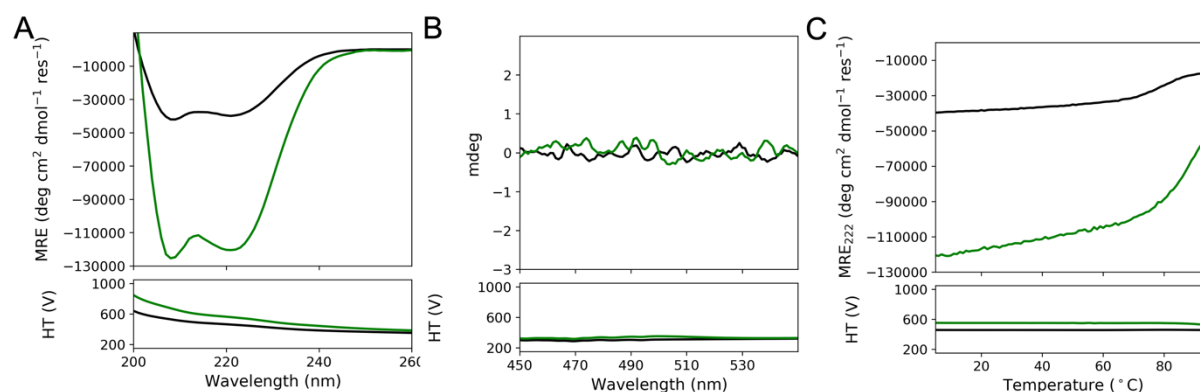

**Figure S47. CD Characterization of CC-Hept-IV-hen2 and FAM-Hept-IV-hen2.** CD spectra of 50  $\mu$ M CC-Hept-IV-hen2 (black) and 25  $\mu$ M FAM-CC-Hept-IV-hen2 (green) in PBS at 5 °C are shown in (A) and (B). Samples were analysed prior to melting (solid lines) and post-melting

(dotted lines). (A) shows the spectra between 260-200 nm and (B) shows the spectra between 550-450 nm. (C) shows the thermal melt of the two peptides from 5-95 °C. The labelled peptide shows an increase in CD signal (A). However, the thermal melts are consistent between the samples, indicative that the FAM-labelled peptide has the same thermodynamic properties as the unlabelled peptide.

**Table S8.** Table 1 of CC-Hex2-hen2 with Ala at *h*, CC-Hept-hen2 with Ala at *h*, and CC-Hept-IV-hen2 structures.

|                                 | CC-Hex2-hen2, Ala at <i>h</i> (PDB 9gf2) | CC-Hept-hen2, Ala at <i>h</i> (PDB 9gf3) | CC-Hept-IV-hen2 (PDB 9gf4)    |
|---------------------------------|------------------------------------------|------------------------------------------|-------------------------------|
| Wavelength (Å)                  | 0.9795                                   | 0.9795                                   | 0.9795                        |
| Resolution Range                | 48.56 - 2.10 (2.31 - 2.1)                | 47.51-1.65 (1.67-1.65)                   | 19.67-1.49 (1.52-1.49)        |
| Space Group                     | P 2 21 21                                | P 21 21 21                               | P 2 21 21                     |
| Unit Cell                       | 48.563 58.157 59.258 90 90 90            | 60.267 61.754 154.441 90 90 90           | 38.546 47.919 153.02 90 90 90 |
| Unique Reflections              | 10246 (2510)                             | 70117 (2831)                             | 47044 (2595)                  |
| Completeness (%)                | 99.59 (99.84)                            | 99.83 (100.00)                           | 99.57 (95.65)                 |
| Wilson B-factor                 | 33.40                                    | 21.79                                    | 20.26                         |
| Reflections used in refinement  | 10246 (2510)                             | 70117 (2831)                             | 47044 (2595)                  |
| Reflections used for R-free     | 532(114)                                 | 3455 (135)                               | 2431 (148)                    |
| R-work                          | 0.2252 (0.1904)                          | 0.1939 (0.3003)                          | 0.1715 (0.2311)               |
| R-free                          | 0.2220 (0.1944)                          | 0.2148 (0.3255)                          | 0.1972 (0.2912)               |
| Number of non-hydrogen atoms    | 1426                                     | 4046                                     | 1999                          |
| macromolecules                  | 1372                                     | 3474                                     | 1716                          |
| ligands                         | 16                                       | 173                                      | 90                            |
| solvent                         | 38                                       | 399                                      | 193                           |
| Protein Residues                | 190                                      | 476                                      | 238                           |
| RMS(bonds)                      | 0.022                                    | 0.059                                    | 0.064                         |
| RMS(angles)                     | 2.52                                     | 1.49                                     | 1.27                          |
| Ramachandran favoured(%)        | 96.63                                    | 100.00                                   | 100.00                        |
| Ramachandran allowed(%)         | 1.69                                     | 0.00                                     | 0.00                          |
| Ramachandran outliers(%)        | 1.69                                     | 0.00                                     | 0.00                          |
| Rotamer outliers(%)             | 7.81                                     | 0.00                                     | 0.00                          |
| Clashscore                      | 7.22                                     | 2.88                                     | 1.33                          |
| Average B-factor macromolecules | 52.62                                    | 29.07                                    | 25.71                         |
| ligands                         | 53.04                                    | 26.47                                    | 22.82                         |
| solvent                         | 43.57                                    | 55.53                                    | 51.11                         |
|                                 | 41.15                                    | 40.22                                    | 39.54                         |



**Table S9.** Oligomeric states of CC-Pent2-hen3 and CC-Hept-IV-hen2 measured by AUC (SV and SE) and in crystal structures.

| Peptide         | Oligomeric state based on SV data | Oligomeric state based on SV data | Oligomeric state based on crystallography data |
|-----------------|-----------------------------------|-----------------------------------|------------------------------------------------|
| CC-Pent2-hen3   | 5.3                               | 4.9                               | ND                                             |
| CC-Hept-IV-hen2 | 6.1                               | 6.0                               | 7                                              |

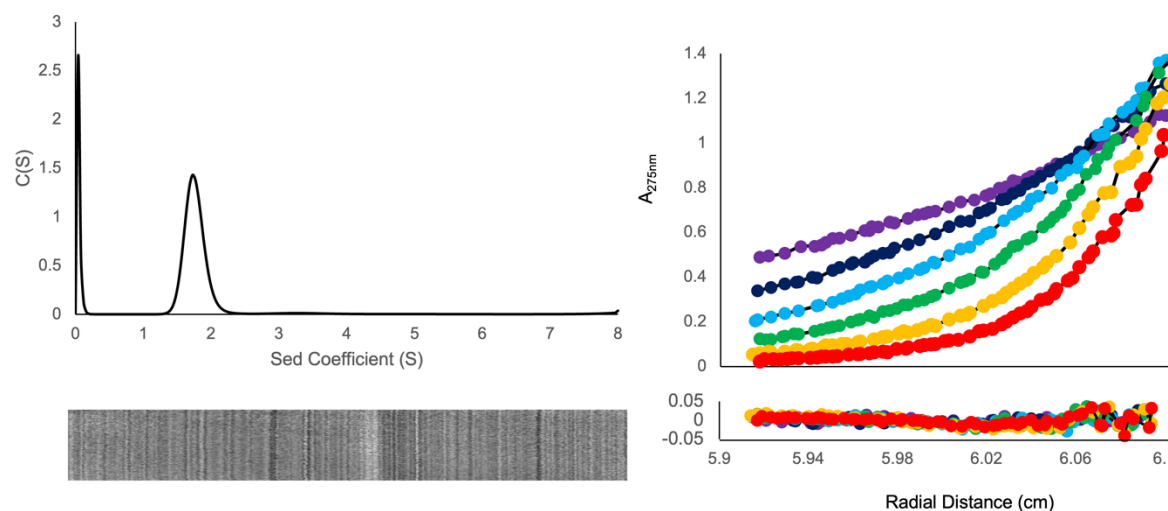**Figure S48.** AUC data for CC-Pent2-hen3. Left shows the sedimentation velocity (SV) data acquired for CC-Pent2-hen3. The molecular weight calculated from the data is 19558 Da = 5.3 x the monomeric mass of CC-Pent2-hen3 (3693.4 Da) ( $f/f_0 = 1.225$ ,  $s = 1.757$ ,  $sw(20,w) = 1.798$  S). Right shows the sedimentation equilibrium data acquired for CC-Pent2-hen3. The molecular weight derived from the data is 18098 Da = 4.9 x the monomeric mass of CC-Pent2-hen3 ( $\chi^2 = 4.98$ ).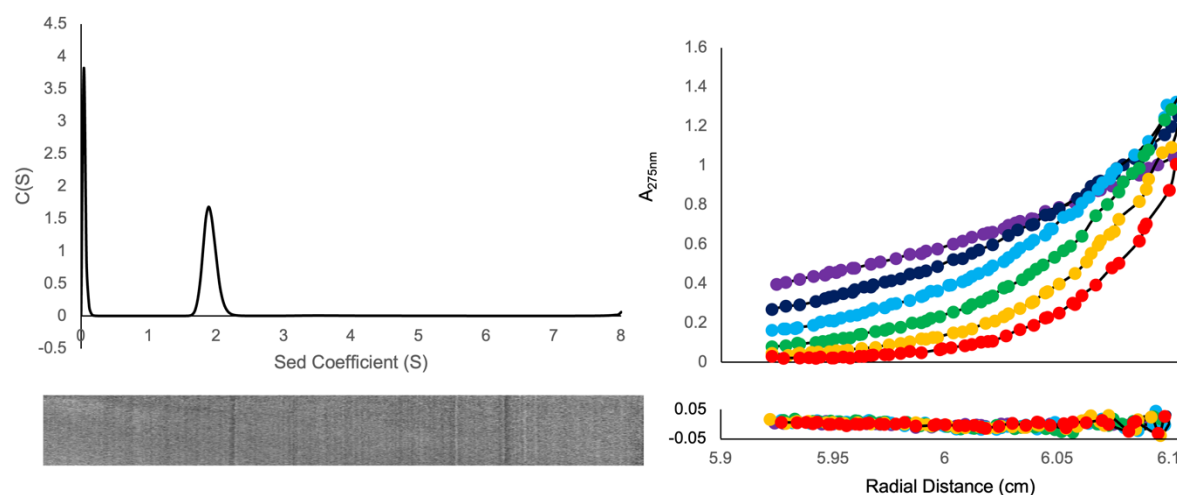**Figure S49.** AUC data for CC-Hept-IV-hen2. Left shows the sedimentation velocity (SV) data acquired for CC-Hept-IV-hen2. The molecular weight calculated from the data is 21185 Da = 6.1 x the monomeric mass of CC-Hept-IV-hen2 (3503.1 Da) ( $f/f_0 = 1.204$ ,  $s = 1.909$ ,  $sw(20,w) = 1.953$  S). Right shows the sedimentation equilibrium data acquired for CC-Hept-IV-hen2. The molecular weight derived from the data is 20904 Da = 6.0 x the monomeric mass of CC-Hept-IV-hen2 ( $\chi^2 = 3.94$ ).

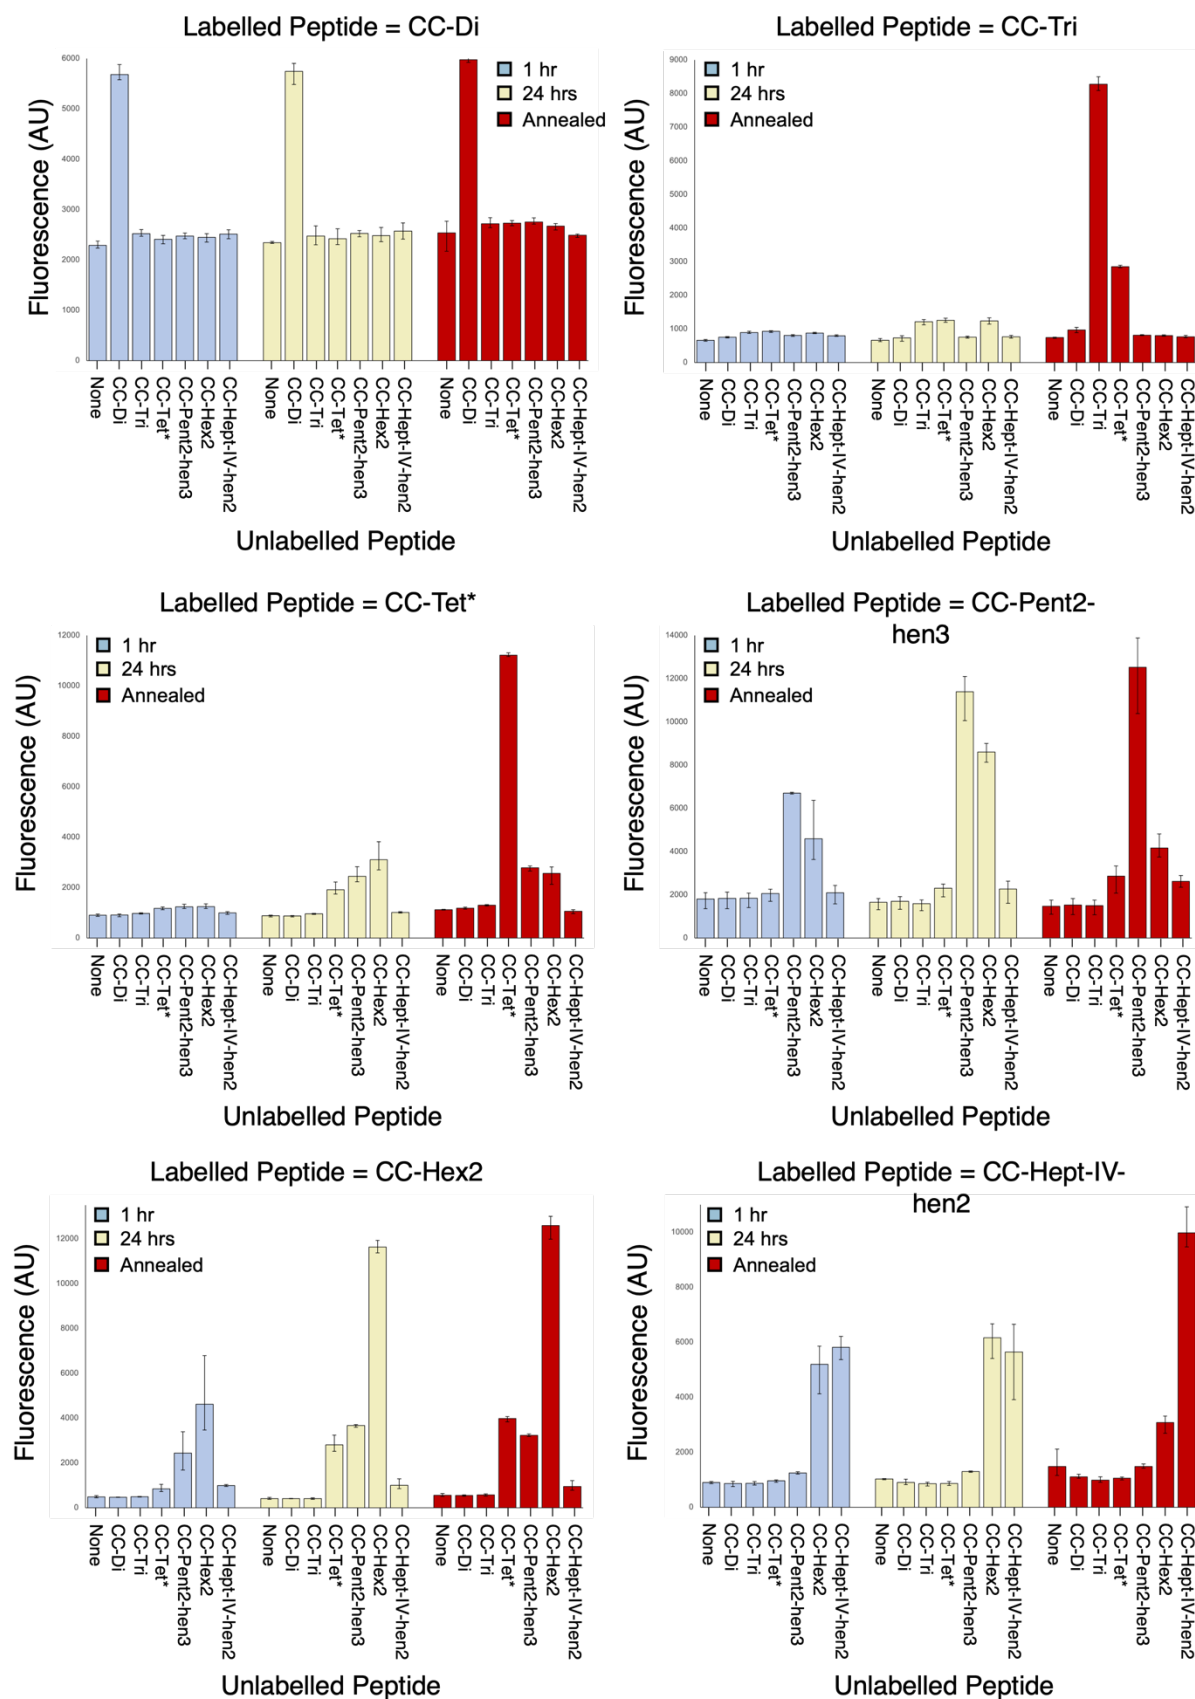

**Figure S50. Histogram representation of Orthogonal CC Set fluorescence exchange data.** The raw fluorescence measurements of the Orthogonal CC Set exchange studies are shown. The plotted fluorescence is the averaged value between three measurements. The

top and bottom of the error bars are the maximum and minimum fluorescence values observed for each mixture respectively.

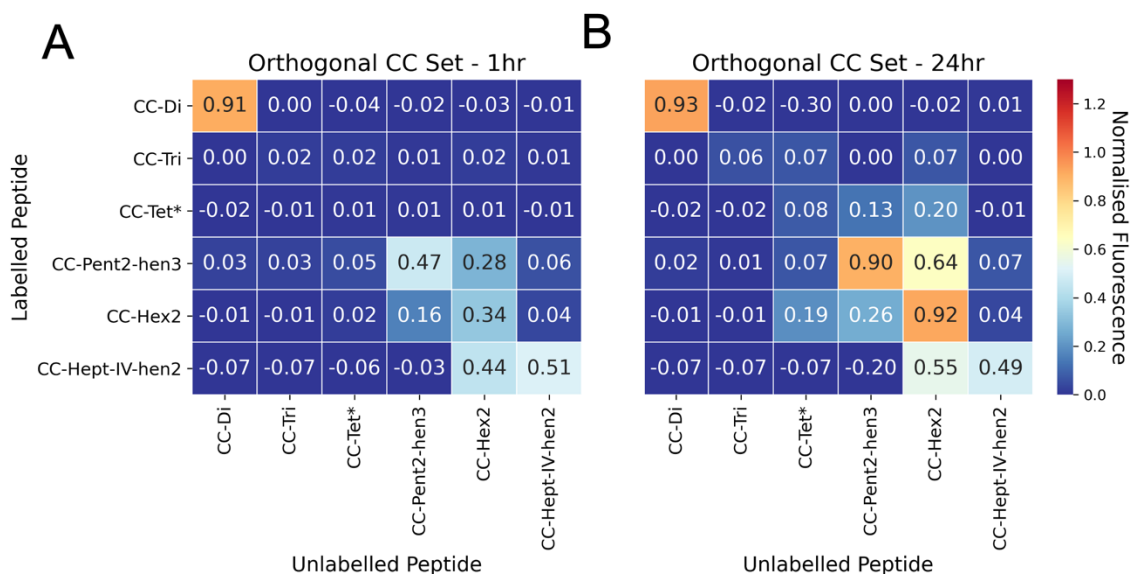

**Figure S51. Heat map representation of Orthogonal CC Set fluorescence exchange data acquired at 1 hr and 24 hrs.** The normalised values of the Orthogonal CC Set exchange studies are shown. Samples were incubated at 25°C in PBS buffer and measurements were taken 1 hr (A) and 24 hrs (B) post-mixing.

Table S10. Orthogonal CC Set Fluorescence Data

| FAM-labelled Peptide | Unlabelled Peptide | 1 hr-raw |      |      | 1 hr-normalised |        |        | Avg    | Std Dev |
|----------------------|--------------------|----------|------|------|-----------------|--------|--------|--------|---------|
| FAM-CC-Di            | -                  | 2235     | 2372 | 2256 | -0.087          | -0.048 | -0.081 | -0.072 | 0.021   |
| FAM-CC-Di            | CC-Di              | 5577     | 5880 | 5582 | 0.884           | 0.972  | 0.885  | 0.914  | 0.050   |
| FAM-CC-Di            | CC-Tri             | 2470     | 2488 | 2603 | -0.019          | -0.014 | 0.019  | -0.005 | 0.021   |
| FAM-CC-Di            | CC-Tet*            | 2319     | 2486 | 2418 | -0.063          | -0.015 | -0.034 | -0.037 | 0.024   |
| FAM-CC-Di            | CC-Pent2-hen3      | 2467     | 2533 | 2419 | -0.020          | -0.001 | -0.034 | -0.018 | 0.017   |
| FAM-CC-Di            | CC-Hex2            | 2354     | 2520 | 2471 | -0.053          | -0.005 | -0.019 | -0.025 | 0.025   |
| FAM-CC-Di            | CC-Hept-IV-hen2    | 2421     | 2598 | 2523 | -0.033          | 0.018  | -0.004 | -0.006 | 0.026   |
| FAM-CC-Tri           | -                  | 631      | 685  | 671  | -0.015          | -0.007 | -0.009 | -0.010 | 0.004   |
| FAM-CC-Tri           | CC-Di              | 758      | 728  | 769  | 0.002           | -0.002 | 0.004  | 0.001  | 0.003   |
| FAM-CC-Tri           | CC-Tri             | 867      | 928  | 879  | 0.017           | 0.025  | 0.018  | 0.020  | 0.004   |
| FAM-CC-Tri           | CC-Tet*            | 942      | 948  | 891  | 0.027           | 0.028  | 0.020  | 0.025  | 0.004   |
| FAM-CC-Tri           | CC-Pent2-hen3      | 778      | 829  | 804  | 0.005           | 0.012  | 0.008  | 0.008  | 0.003   |
| FAM-CC-Tri           | CC-Hex2            | 871      | 897  | 861  | 0.017           | 0.021  | 0.016  | 0.018  | 0.002   |
| FAM-CC-Tri           | CC-Hept-IV-hen2    | 823      | 776  | 783  | 0.011           | 0.005  | 0.006  | 0.007  | 0.003   |
| FAM-CC-Tet*          | -                  | 860      | 947  | 908  | -0.026          | -0.017 | -0.021 | -0.021 | 0.004   |
| FAM-CC-Tet*          | CC-Di              | 843      | 943  | 953  | -0.027          | -0.017 | -0.016 | -0.020 | 0.006   |
| FAM-CC-Tet*          | CC-Tri             | 954      | 1000 | 960  | -0.016          | -0.012 | -0.016 | -0.015 | 0.002   |
| FAM-CC-Tet*          | CC-Tet*            | 1125     | 1227 | 1173 | 0.001           | 0.011  | 0.005  | 0.006  | 0.005   |
| FAM-CC-Tet*          | CC-Pent2-hen3      | 1209     | 1340 | 1167 | 0.009           | 0.022  | 0.005  | 0.012  | 0.009   |
| FAM-CC-Tet*          | CC-Hex2            | 1217     | 1351 | 1171 | 0.010           | 0.023  | 0.005  | 0.013  | 0.009   |
| FAM-CC-Tet*          | CC-Hept-IV-hen2    | 1025     | 1043 | 932  | -0.009          | -0.008 | -0.019 | -0.012 | 0.006   |
| FAM-CC-Pent2-hen3    | -                  | 2096     | 1962 | 1353 | 0.056           | 0.044  | -0.011 | 0.030  | 0.036   |
| FAM-CC-Pent2-hen3    | CC-Di              | 2028     | 2120 | 1356 | 0.050           | 0.058  | -0.011 | 0.033  | 0.038   |
| FAM-CC-Pent2-hen3    | CC-Tri             | 2074     | 2053 | 1404 | 0.054           | 0.052  | -0.006 | 0.033  | 0.034   |
| FAM-CC-Pent2-hen3    | CC-Tet*            | 2226     | 2257 | 1696 | 0.068           | 0.071  | 0.020  | 0.053  | 0.029   |
| FAM-CC-Pent2-hen3    | CC-Pent2-hen3      | 6715     | 6660 | 6742 | 0.474           | 0.469  | 0.477  | 0.474  | 0.004   |

|                     |                 |      |      |      |        |        |        |        |       |
|---------------------|-----------------|------|------|------|--------|--------|--------|--------|-------|
| FAM-CC-Pent2-hen3   | CC-Hex2         | 3753 | 6373 | 3633 | 0.206  | 0.443  | 0.195  | 0.282  | 0.140 |
| FAM-CC-Pent2-hen3   | CC-Hept-IV-hen2 | 2430 | 2282 | 1581 | 0.086  | 0.073  | 0.010  | 0.056  | 0.041 |
| FAM-CC-Hex2         | -               | 937  | 916  | 854  | -0.064 | -0.066 | -0.074 | -0.068 | 0.005 |
| FAM-CC-Hex2         | CC-Di           | 904  | 946  | 749  | -0.068 | -0.063 | -0.086 | -0.072 | 0.012 |
| FAM-CC-Hex2         | CC-Tri          | 875  | 935  | 805  | -0.071 | -0.064 | -0.079 | -0.072 | 0.008 |
| FAM-CC-Hex2         | CC-Tet*         | 989  | 985  | 909  | -0.058 | -0.058 | -0.067 | -0.061 | 0.005 |
| FAM-CC-Hex2         | CC-Pent2-hen3   | 1292 | 1208 | 1249 | -0.022 | -0.032 | -0.027 | -0.027 | 0.005 |
| FAM-CC-Hex2         | CC-Hex2         | 4124 | 5615 | 5855 | 0.311  | 0.487  | 0.515  | 0.438  | 0.110 |
| FAM-CC-Hex2         | CC-Hept-IV-hen2 | 5873 | 6211 | 5365 | 0.517  | 0.557  | 0.458  | 0.511  | 0.050 |
| FAM-CC-Hept-IV-hen2 | -               | 1705 | 1859 | 1931 | 0.041  | 0.054  | 0.060  | 0.052  | 0.010 |
| FAM-CC-Hept-IV-hen2 | CC-Di           | 2452 | 1929 | 1710 | 0.103  | 0.060  | 0.042  | 0.068  | 0.031 |
| FAM-CC-Hept-IV-hen2 | CC-Tri          | 2426 | 1895 | 1878 | 0.101  | 0.057  | 0.056  | 0.071  | 0.026 |
| FAM-CC-Hept-IV-hen2 | CC-Tet*         | 1969 | 1721 | 1706 | 0.063  | 0.043  | 0.042  | 0.049  | 0.012 |
| FAM-CC-Hept-IV-hen2 | CC-Pent2-hen3   | 1891 | 2231 | 1864 | 0.057  | 0.085  | 0.055  | 0.065  | 0.017 |
| FAM-CC-Hept-IV-hen2 | CC-Hex2         | 2103 | 2099 | 1855 | 0.074  | 0.074  | 0.054  | 0.067  | 0.012 |
| FAM-CC-Hept-IV-hen2 | CC-Hept-IV-hen2 | 2201 | 1963 | 1739 | 0.082  | 0.063  | 0.044  | 0.063  | 0.019 |

| <b>FAM-labelled Peptide</b> | <b>Unlabelled Peptide</b> | <b>24 hr-raw</b> |      |      | <b>24 hr-normalised</b> |        |        | <b>Avg</b> | <b>Std Dev</b> |
|-----------------------------|---------------------------|------------------|------|------|-------------------------|--------|--------|------------|----------------|
| FAM-CC-Di                   | -                         | 2366             | 2328 | 2333 | -0.049                  | -0.060 | -0.059 | -0.056     | 0.006          |
| FAM-CC-Di                   | CC-Di                     | 5900             | 5485 | 5847 | 0.978                   | 0.857  | 0.962  | 0.932      | 0.066          |
| FAM-CC-Di                   | CC-Tri                    | 2445             | 2300 | 2675 | -0.026                  | -0.069 | 0.040  | -0.018     | 0.055          |
| FAM-CC-Di                   | CC-Tet*                   | 2304             | 2337 | 2617 | -0.067                  | -0.058 | 0.024  | -0.034     | 0.050          |
| FAM-CC-Di                   | CC-Pent2-hen3             | 2583             | 2460 | 2533 | 0.014                   | -0.022 | -0.001 | -0.003     | 0.018          |
| FAM-CC-Di                   | CC-Hex2                   | 2441             | 2363 | 2644 | -0.028                  | -0.050 | 0.031  | -0.015     | 0.042          |
| FAM-CC-Di                   | CC-Hept-IV-hen2           | 2571             | 2412 | 2732 | 0.010                   | -0.036 | 0.057  | 0.010      | 0.046          |
| FAM-CC-Tri                  | -                         | 646              | 620  | 712  | -0.013                  | -0.016 | -0.004 | -0.011     | 0.006          |
| FAM-CC-Tri                  | CC-Di                     | 767              | 629  | 794  | 0.003                   | -0.015 | 0.007  | -0.001     | 0.012          |
| FAM-CC-Tri                  | CC-Tri                    | 1279             | 1118 | 1233 | 0.071                   | 0.050  | 0.065  | 0.062      | 0.011          |

|                     |                 |       |       |       |        |        |        |        |       |
|---------------------|-----------------|-------|-------|-------|--------|--------|--------|--------|-------|
| FAM-CC-Tri          | CC-Tet*         | 1251  | 1194  | 1316  | 0.068  | 0.060  | 0.076  | 0.068  | 0.008 |
| FAM-CC-Tri          | CC-Pent2-hen3   | 755   | 727   | 785   | 0.002  | -0.002 | 0.006  | 0.002  | 0.004 |
| FAM-CC-Tri          | CC-Hex2         | 1232  | 1144  | 1329  | 0.065  | 0.054  | 0.078  | 0.066  | 0.012 |
| FAM-CC-Tri          | CC-Hept-IV-hen2 | 808   | 725   | 765   | 0.009  | -0.002 | 0.003  | 0.003  | 0.006 |
| FAM-CC-Tet*         | -               | 903   | 836   | 894   | -0.021 | -0.028 | -0.022 | -0.024 | 0.004 |
| FAM-CC-Tet*         | CC-Di           | 836   | 888   | 890   | -0.028 | -0.023 | -0.023 | -0.025 | 0.003 |
| FAM-CC-Tet*         | CC-Tri          | 939   | 977   | 950   | -0.018 | -0.014 | -0.017 | -0.016 | 0.002 |
| FAM-CC-Tet*         | CC-Tet*         | 1743  | 2224  | 1775  | 0.062  | 0.109  | 0.065  | 0.079  | 0.027 |
| FAM-CC-Tet*         | CC-Pent2-hen3   | 2275  | 2827  | 2231  | 0.114  | 0.169  | 0.110  | 0.131  | 0.033 |
| FAM-CC-Tet*         | CC-Hex2         | 2807  | 3815  | 2698  | 0.167  | 0.267  | 0.156  | 0.197  | 0.061 |
| FAM-CC-Tet*         | CC-Hept-IV-hen2 | 987   | 1006  | 1042  | -0.013 | -0.011 | -0.008 | -0.011 | 0.003 |
| FAM-CC-Pent2-hen3   | -               | 1827  | 1818  | 1312  | 0.032  | 0.031  | -0.015 | 0.016  | 0.027 |
| FAM-CC-Pent2-hen3   | CC-Di           | 1857  | 1915  | 1325  | 0.035  | 0.040  | -0.014 | 0.020  | 0.029 |
| FAM-CC-Pent2-hen3   | CC-Tri          | 1749  | 1761  | 1262  | 0.025  | 0.026  | -0.019 | 0.011  | 0.026 |
| FAM-CC-Pent2-hen3   | CC-Tet*         | 2496  | 2494  | 1906  | 0.092  | 0.092  | 0.039  | 0.075  | 0.031 |
| FAM-CC-Pent2-hen3   | CC-Pent2-hen3   | 12100 | 12029 | 10059 | 0.962  | 0.956  | 0.777  | 0.898  | 0.105 |
| FAM-CC-Pent2-hen3   | CC-Hex2         | 9002  | 8133  | 8658  | 0.681  | 0.603  | 0.650  | 0.645  | 0.040 |
| FAM-CC-Pent2-hen3   | CC-Hept-IV-hen2 | 2624  | 2577  | 1610  | 0.104  | 0.100  | 0.012  | 0.072  | 0.052 |
| FAM-CC-Hex2         | -               | 460   | 391   | 373   | -0.008 | -0.014 | -0.015 | -0.013 | 0.004 |
| FAM-CC-Hex2         | CC-Di           | 416   | 396   | 415   | -0.012 | -0.014 | -0.012 | -0.012 | 0.001 |
| FAM-CC-Hex2         | CC-Tri          | 441   | 372   | 397   | -0.010 | -0.016 | -0.013 | -0.013 | 0.003 |
| FAM-CC-Hex2         | CC-Tet*         | 2668  | 3237  | 2515  | 0.175  | 0.223  | 0.163  | 0.187  | 0.032 |
| FAM-CC-Hex2         | CC-Pent2-hen3   | 3710  | 3699  | 3584  | 0.262  | 0.261  | 0.251  | 0.258  | 0.006 |
| FAM-CC-Hex2         | CC-Hex2         | 11610 | 11929 | 11367 | 0.919  | 0.945  | 0.899  | 0.921  | 0.023 |
| FAM-CC-Hex2         | CC-Hept-IV-hen2 | 857   | 1287  | 850   | 0.025  | 0.061  | 0.024  | 0.036  | 0.021 |
| FAM-CC-Hept-IV-hen2 | -               | 999   | 1042  | 1033  | -0.057 | -0.051 | -0.053 | -0.054 | 0.003 |
| FAM-CC-Hept-IV-hen2 | CC-Di           | 862   | 1020  | 825   | -0.073 | -0.054 | -0.077 | -0.068 | 0.012 |
| FAM-CC-Hept-IV-hen2 | CC-Tri          | 886   | 909   | 772   | -0.070 | -0.067 | -0.083 | -0.073 | 0.009 |
| FAM-CC-Hept-IV-hen2 | CC-Tet*         | 869   | 939   | 796   | -0.072 | -0.064 | -0.080 | -0.072 | 0.008 |

|                     |                 |      |      |      |        |        |        |        |       |
|---------------------|-----------------|------|------|------|--------|--------|--------|--------|-------|
| FAM-CC-Hept-IV-hen2 | CC-Pent2-hen3   | 1293 | 1271 | 1320 | -0.022 | -0.025 | -0.019 | -0.022 | 0.003 |
| FAM-CC-Hept-IV-hen2 | CC-Hex2         | 6400 | 5410 | 6664 | 0.579  | 0.463  | 0.611  | 0.551  | 0.078 |
| FAM-CC-Hept-IV-hen2 | CC-Hept-IV-hen2 | 6363 | 6653 | 3908 | 0.575  | 0.609  | 0.286  | 0.490  | 0.178 |

| <b>FAM-labelled Peptide</b> | <b>Unlabelled Peptide</b> | <b>annealed-raw</b> |       |       | <b>annealed-normalised</b> |        |        | <b>Avg</b> | <b>Std Dev</b> |
|-----------------------------|---------------------------|---------------------|-------|-------|----------------------------|--------|--------|------------|----------------|
| FAM-CC-Di                   | -                         | 2170                | 2669  | 2769  | -0.106                     | 0.039  | 0.068  | 0.000      | 0.093          |
| FAM-CC-Di                   | CC-Di                     | 5943                | 6068  | 5920  | 0.990                      | 1.026  | 0.983  | 1.000      | 0.023          |
| FAM-CC-Di                   | CC-Tri                    | 2837                | 2642  | 2676  | 0.087                      | 0.031  | 0.041  | 0.053      | 0.030          |
| FAM-CC-Di                   | CC-Tet*                   | 2679                | 2730  | 2779  | 0.042                      | 0.056  | 0.071  | 0.056      | 0.015          |
| FAM-CC-Di                   | CC-Pent2-hen3             | 2835                | 2713  | 2711  | 0.087                      | 0.051  | 0.051  | 0.063      | 0.021          |
| FAM-CC-Di                   | CC-Hex2                   | 2720                | 2703  | 2593  | 0.053                      | 0.049  | 0.017  | 0.040      | 0.020          |
| FAM-CC-Di                   | CC-Hept-IV-hen2           | 2511                | 2510  | 2448  | -0.007                     | -0.008 | -0.026 | -0.013     | 0.010          |
| FAM-CC-Tri                  | -                         | 751                 | 717   | 754   | 0.001                      | -0.003 | 0.002  | 0.000      | 0.003          |
| FAM-CC-Tri                  | CC-Di                     | 1046                | 888   | 975   | 0.041                      | 0.020  | 0.031  | 0.030      | 0.010          |
| FAM-CC-Tri                  | CC-Tri                    | 8243                | 8496  | 8093  | 0.995                      | 1.029  | 0.976  | 1.000      | 0.027          |
| FAM-CC-Tri                  | CC-Tet*                   | 2890                | 2818  | 2853  | 0.285                      | 0.276  | 0.280  | 0.280      | 0.005          |
| FAM-CC-Tri                  | CC-Pent2-hen3             | 828                 | 805   | 800   | 0.012                      | 0.009  | 0.008  | 0.009      | 0.002          |
| FAM-CC-Tri                  | CC-Hex2                   | 781                 | 794   | 822   | 0.005                      | 0.007  | 0.011  | 0.008      | 0.003          |
| FAM-CC-Tri                  | CC-Hept-IV-hen2           | 804                 | 738   | 746   | 0.008                      | 0.000  | 0.001  | 0.003      | 0.005          |
| FAM-CC-Tet*                 | -                         | 1104                | 1118  | 1136  | -0.002                     | 0.000  | 0.002  | 0.000      | 0.002          |
| FAM-CC-Tet*                 | CC-Di                     | 1145                | 1224  | 1180  | 0.003                      | 0.010  | 0.006  | 0.006      | 0.004          |
| FAM-CC-Tet*                 | CC-Tri                    | 1269                | 1319  | 1299  | 0.015                      | 0.020  | 0.018  | 0.017      | 0.002          |
| FAM-CC-Tet*                 | CC-Tet*                   | 11307               | 11171 | 11160 | 1.009                      | 0.996  | 0.995  | 1.000      | 0.008          |
| FAM-CC-Tet*                 | CC-Pent2-hen3             | 2657                | 2853  | 2843  | 0.152                      | 0.172  | 0.171  | 0.165      | 0.011          |
| FAM-CC-Tet*                 | CC-Hex2                   | 2129                | 2748  | 2815  | 0.100                      | 0.161  | 0.168  | 0.143      | 0.037          |
| FAM-CC-Tet*                 | CC-Hept-IV-hen2           | 1086                | 1121  | 969   | -0.003                     | 0.000  | -0.015 | -0.006     | 0.008          |
| FAM-CC-Pent2-hen3           | -                         | 1579                | 1748  | 1097  | 0.009                      | 0.025  | -0.034 | 0.000      | 0.031          |
| FAM-CC-Pent2-hen3           | CC-Di                     | 1658                | 1821  | 1084  | 0.017                      | 0.031  | -0.035 | 0.004      | 0.035          |

|                     |                 |       |       |       |        |        |        |        |       |
|---------------------|-----------------|-------|-------|-------|--------|--------|--------|--------|-------|
| FAM-CC-Pent2-hen3   | CC-Tri          | 1664  | 1748  | 1071  | 0.017  | 0.025  | -0.037 | 0.002  | 0.033 |
| FAM-CC-Pent2-hen3   | CC-Tet*         | 3167  | 3332  | 2078  | 0.153  | 0.168  | 0.055  | 0.125  | 0.062 |
| FAM-CC-Pent2-hen3   | CC-Pent2-hen3   | 13302 | 13881 | 10377 | 1.071  | 1.123  | 0.806  | 1.000  | 0.170 |
| FAM-CC-Pent2-hen3   | CC-Hex2         | 4814  | 3926  | 3748  | 0.302  | 0.222  | 0.206  | 0.243  | 0.052 |
| FAM-CC-Pent2-hen3   | CC-Hept-IV-hen2 | 2886  | 2623  | 2349  | 0.128  | 0.104  | 0.079  | 0.104  | 0.024 |
| FAM-CC-Hex2         | -               | 632   | 499   | 546   | 0.006  | -0.005 | -0.001 | 0.000  | 0.006 |
| FAM-CC-Hex2         | CC-Di           | 567   | 508   | 572   | 0.001  | -0.004 | 0.001  | -0.001 | 0.003 |
| FAM-CC-Hex2         | CC-Tri          | 615   | 519   | 592   | 0.005  | -0.003 | 0.003  | 0.001  | 0.004 |
| FAM-CC-Hex2         | CC-Tet*         | 4064  | 3828  | 4041  | 0.291  | 0.272  | 0.289  | 0.284  | 0.011 |
| FAM-CC-Hex2         | CC-Pent2-hen3   | 3295  | 3210  | 3175  | 0.227  | 0.220  | 0.217  | 0.222  | 0.005 |
| FAM-CC-Hex2         | CC-Hex2         | 13004 | 11976 | 12783 | 1.035  | 0.949  | 1.016  | 1.000  | 0.045 |
| FAM-CC-Hex2         | CC-Hept-IV-hen2 | 784   | 1213  | 859   | 0.019  | 0.054  | 0.025  | 0.033  | 0.019 |
| FAM-CC-Hept-IV-hen2 | -               | 1154  | 1172  | 2112  | -0.038 | -0.036 | 0.074  | 0.000  | 0.065 |
| FAM-CC-Hept-IV-hen2 | CC-Di           | 1056  | 1201  | 1053  | -0.050 | -0.033 | -0.050 | -0.044 | 0.010 |
| FAM-CC-Hept-IV-hen2 | CC-Tri          | 1103  | 907   | 937   | -0.044 | -0.067 | -0.064 | -0.059 | 0.012 |
| FAM-CC-Hept-IV-hen2 | CC-Tet*         | 1101  | 1086  | 991   | -0.045 | -0.046 | -0.058 | -0.049 | 0.007 |
| FAM-CC-Hept-IV-hen2 | CC-Pent2-hen3   | 1575  | 1419  | 1447  | 0.011  | -0.007 | -0.004 | 0.000  | 0.010 |
| FAM-CC-Hept-IV-hen2 | CC-Hex2         | 3246  | 2687  | 3311  | 0.208  | 0.142  | 0.216  | 0.189  | 0.040 |
| FAM-CC-Hept-IV-hen2 | CC-Hept-IV-hen2 | 9536  | 9460  | 10919 | 0.949  | 0.940  | 1.112  | 1.000  | 0.097 |



## References

1. Fletcher, J. M.; Boyle, A. L.; Bruning, M.; Bartlett, G. J.; Vincent, T. L.; Zaccai, N. R.; Armstrong, C. T.; Bromley, E. H. C.; Booth, P. J.; Brady, R. L.; Thomson, A. R.; Woolfson, D. N. A Basis Set of Coiled-Coil Peptide Oligomers for Rational Protein Design and Synthetic Biology. *ACS Synth Biol* 2012, 1 (6), 240-250. DOI: 10.1021/sb300028q.
2. Edgell, C. L.; Savery, N. J.; Woolfson, D. N. Robust de novo Designed Homotetrameric Coiled Coils. *Biochemistry-US* 2020, 59 (10), 1087-1092. DOI: 10.1021/acs.biochem.0c00082.
3. Dawson, W. M.; Martin, F. J. O.; Rhys, G. G.; Shelley, K. L.; Brady, R. L.; Woolfson, D. N. Coiled coils 9-to-5: rational design of  $\alpha$ -helical barrels with tunable oligomeric states. *Chem. Sci.* 2021, 12 (20), 6923-6928. DOI: 10.1039/d1sc00460c.
4. Martin, F. J. O. Exploring the Dynamic and Conformational Landscape of  $\alpha$ -Helical Peptide Assemblies. Ph. D. Dissertation, University of Bristol, Bristol, UK, 2022.
5. Schuck, P. Size-distribution analysis of macromolecules by sedimentation velocity ultracentrifugation and lamm equation modeling. *Biophys J* 2000, 78 (3), 1606-1619. DOI: 10.1016/S0006-3495(00)76713-0.
6. Schuck, P. On the analysis of protein self-association by sedimentation velocity analytical ultracentrifugation. *Anal Biochem* 2003, 320 (1), 104-124. DOI: 10.1016/s0003-2697(03)00289-6.
7. Winter, G. xia2: an expert system for macromolecular crystallography data reduction. *Journal of Applied Crystallography* 2010, 43, 186-190. DOI: 10.1107/S0021889809045701.
8. Winter, G.; Waterman, D. G.; Parkhurst, J. M.; Brewster, A. S.; Gildea, R. J.; Gerstel, M.; Fuentes-Montero, L.; Vollmar, M.; Michels-Clark, T.; Young, I. D.; et al. DIALS: implementation and evaluation of a new integration package. *Acta Crystallogr D Struct Biol* 2018, 74 (Pt 2), 85-97. DOI: 10.1107/S2059798317017235.
9. Powell, H. R. The Rossmann Fourier autoindexing algorithm in MOSFLM. *Acta Crystallogr D Biol Crystallogr* 1999, 55 (Pt 10), 1690-1695. DOI: 10.1107/s0907444999009506.
10. Evans, P. R.; Murshudov, G. N. How good are my data and what is the resolution? *Acta Crystallogr D* 2013, 69, 1204-1214. DOI: 10.1107/S0907444913000061.
11. Winn, M. D.; Ballard, C. C.; Cowtan, K. D.; Dodson, E. J.; Emsley, P.; Evans, P. R.; Keegan, R. M.; Krissinel, E. B.; Leslie, A. G. W.; McCoy, A.; et al. Overview of the ccp4 suite and current developments. *Acta Crystallographica Section D-Structural Biology* 2011, 67, 235-242. DOI: 10.1107/S0907444910045749.
12. Kabsch, W. Xds. *Acta Crystallogr D* 2010, 66, 125-132. DOI: 10.1107/S0907444909047337.
13. Vonrhein, C.; Flensburg, C.; Keller, P.; Sharff, A.; Smart, O.; Paciorek, W.; Womack, T.; Bricogne, G. Data processing and analysis with the autoPROC toolbox. *Acta Crystallogr D Biol Crystallogr* 2011, 67 (Pt 4), 293-302. DOI: 10.1107/S0907444911007773.
14. Rodriguez, D. D.; Grosse, C.; Himmel, S.; Gonzalez, C.; de Ilarduya, I. M.; Becker, S.; Sheldrick, G. M.; Uson, I. Crystallographic ab initio protein structure solution below atomic resolution. *Nat Methods* 2009, 6 (9), 651-653. DOI: 10.1038/nmeth.1365.
15. Caballero, I.; Sammito, M.; Millan, C.; Lebedev, A.; Soler, N.; Uson, I. ARCIMBOLDO on coiled coils. *Acta Crystallogr D Struct Biol* 2018, 74 (Pt 3), 194-204. DOI: 10.1107/S2059798317017582.
16. McCoy, A. J.; Grosse-Kunstleve, R. W.; Adams, P. D.; Winn, M. D.; Storoni, L. C.; Read, R. J. Phaser crystallographic software. *J Appl Crystallogr* 2007, 40 (Pt 4), 658-674. DOI: 10.1107/S0021889807021206.
17. Mirdita, M.; Schutze, K.; Moriwaki, Y.; Heo, L.; Ovchinnikov, S.; Steinegger, M. ColabFold: making protein folding accessible to all. *Nat Methods* 2022, 19 (6), 679-682. DOI: 10.1038/s41592-022-01488-1.
18. Cowtan, K. The Buccaneer software for automated model building. 1. Tracing protein chains. *Acta Crystallogr D Biol Crystallogr* 2006, 62 (Pt 9), 1002-1011. DOI: 10.1107/S0907444906022116.

19. Casanal, A.; Lohkamp, B.; Emsley, P. Current developments in Coot for macromolecular model building of Electron Cryo-microscopy and Crystallographic Data. *Protein Sci* 2020, 29 (4), 1069-1078. DOI: 10.1002/pro.3791.
20. Murshudov, G. N.; Skubak, P.; Lebedev, A. A.; Pannu, N. S.; Steiner, R. A.; Nicholls, R. A.; Winn, M. D.; Long, F.; Vagin, A. A. REFMAC5 for the refinement of macromolecular crystal structures. *Acta Crystallogr D Biol Crystallogr* 2011, 67 (Pt 4), 355-367. DOI: 10.1107/S0907444911001314.
21. Plecs, J. J.; Harbury, P. B.; Kim, P. S.; Alber, T. Structural test of the parameterized-backbone method for protein design. *J. Mol. Biol.* 2004, 342 (1), 289-297. DOI: 10.1016/j.jmb.2004.06.051.
